# Supplementary material for: Ligand-controlled palladium catalysis enables switch between mono- and di-arylation of primary aromatic amines with 2-halobenzothiazoles
Source: Royal Society of Chemistry journal article supplement (doi:10.1039/d0qo00361a), 2020-01-01

*Supporting Information*

Ligand-controlled palladium catalysis enables switch between mono- and di-arylation of primary aromatic amines with 2-halobenzothiazoles

Yan-Qiu Zhu<sup>a</sup>, Rui Zhang<sup>a</sup>, Wei Sang<sup>b</sup>, Hua-Jing Wang<sup>b</sup>, Yuan Wu<sup>c</sup>, Bao-Yi Yu<sup>d</sup>, Jun-Chao Zhang<sup>a</sup>, Hua Cheng<sup>\*a</sup> and Cheng Chen<sup>\*b</sup>

<sup>a</sup> Department of Chemical Engineering and Food Science, Hubei University of Arts and Science, Xiangyang 441053, P. R. China;

<sup>b</sup> State Key Laboratory of Advanced Technology for Materials Synthesis and Processing, Wuhan University of Technology, 122 Luoshi Road, Wuhan 430070, P. R. China;

<sup>c</sup> Key Laboratory of Pesticide & Chemical Biology, College of Chemistry, Central China Normal University, Wuhan 430079, P. R. China;

<sup>d</sup> Key Laboratory of Urban Agriculture (North China), Ministry of Agriculture, Beijing University of Agriculture, Beinong Road 7, Beijing 102206, P. R. China

**Contents:**

|                                                                                                     |          |
|-----------------------------------------------------------------------------------------------------|----------|
| 1. Supplementary information .....                                                                  | S2-S8    |
| 2. Characterization data for compounds <b>3</b> , <b>4</b> , <b>6</b> , <b>7</b> and <b>9</b> ..... | S9-S19   |
| 3. Original NMR and HRMS spectra for <b>3</b> , <b>4</b> , <b>6</b> , <b>7</b> and <b>9</b> .....   | S20-S109 |

## 1. Supplementary information

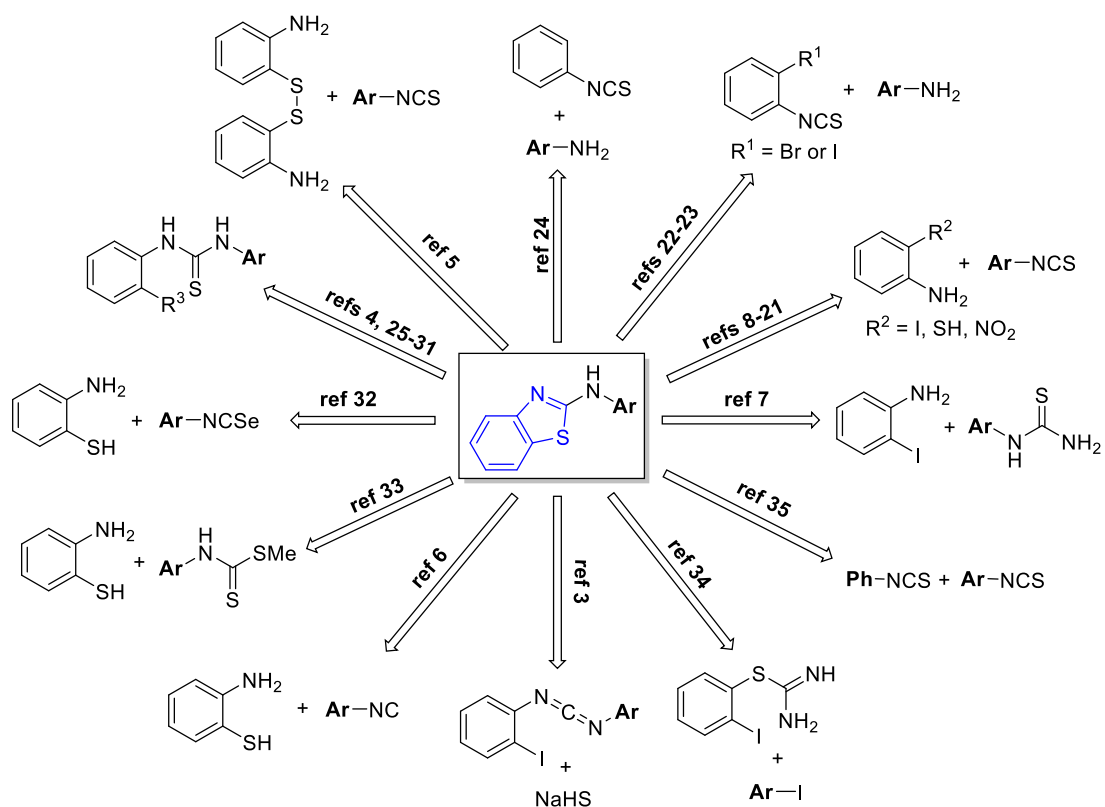

**Figure S1.** Synthesis of 2-aminoarylbenzothiazoles via construction of the benzothiazole ring.

**Table S1.** Optimization of **L15**-based catalytic systems<sup>a</sup>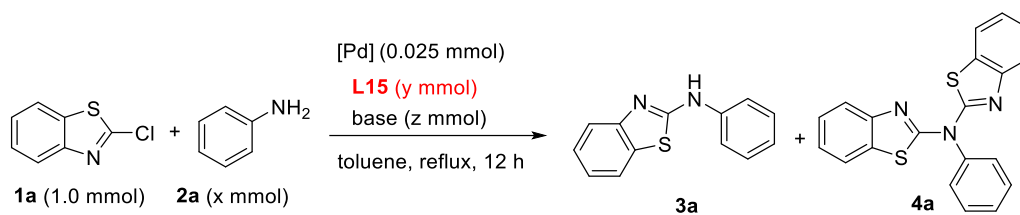

| Entry           | [Pd]                               | Base (z)                               | x           | y            | Yields (%) <sup>b</sup> |           |           |
|-----------------|------------------------------------|----------------------------------------|-------------|--------------|-------------------------|-----------|-----------|
|                 |                                    |                                        |             |              | <b>3a</b>               | <b>4a</b> | <b>1a</b> |
| <b>1</b>        | <b>Pd(OAc)<sub>2</sub></b>         | <b>NaH (1.00)</b>                      | <b>1.00</b> | <b>0.025</b> | -                       | <b>94</b> | -         |
| 2               | Pd(OAc) <sub>2</sub>               | NaOtBu (1.00)                          | 1.00        | 0.025        | -                       | 80        | 18        |
| 3               | Pd(OAc) <sub>2</sub>               | Cs <sub>2</sub> CO <sub>3</sub> (1.00) | 1.00        | 0.025        | 3                       | 18        | 66        |
| 4               | Pd(OAc) <sub>2</sub>               | NaH (1.50)                             | 1.00        | 0.025        | 3                       | 79        | -         |
| 5               | Pd(OAc) <sub>2</sub>               | NaH (2.00)                             | 1.00        | 0.025        | 31                      | 61        | -         |
| 6               | Pd(OAc) <sub>2</sub>               | NaH (1.00)                             | 1.00        | 0.050        | -                       | 72        | 18        |
| 7               | Pd(OAc) <sub>2</sub>               | NaH (1.00)                             | 1.00        | 0.075        | -                       | 70        | 22        |
| 8               | PdCl <sub>2</sub>                  | NaH (1.00)                             | 1.00        | 0.025        | -                       | 55        | 33        |
| 9               | Pd <sub>2</sub> (dba) <sub>3</sub> | NaH (1.00)                             | 1.00        | 0.025        | 3                       | 51        | 26        |
| 10              | Pd(OAc) <sub>2</sub>               | NaH (1.00)                             | 0.50        | 0.025        | -                       | 71        | 18        |
| 11              | Pd(OAc) <sub>2</sub>               | NaH (1.00)                             | 2.00        | 0.025        | 1                       | 92        | -         |
| 12 <sup>c</sup> | Pd(OAc) <sub>2</sub>               | NaH (1.00)                             | 1.00        | 0.025        | -                       | 75        | 19        |

<sup>[a]</sup> **Conditions:** (1) [Pd] (0.025 mmol), **L15** (y mmol), base (z mmol) and toluene (2.5 mL) were heated at reflux under argon for 30 min; (2) **1a** (1.00 mmol) and **2a** (x mmol) were added and the mixture was heated at the same temperature for 12 h. <sup>[b]</sup> NMR yields using 1,3,5-trimethoxybenzene as an internal standard (average of two consistent runs); <sup>[c]</sup> Pd(OAc)<sub>2</sub> (0.0125 mmol) and **L15** (0.0125 mmol) were used.

**Table S2.** Optimization of Xantphos-based catalytic systems<sup>a</sup>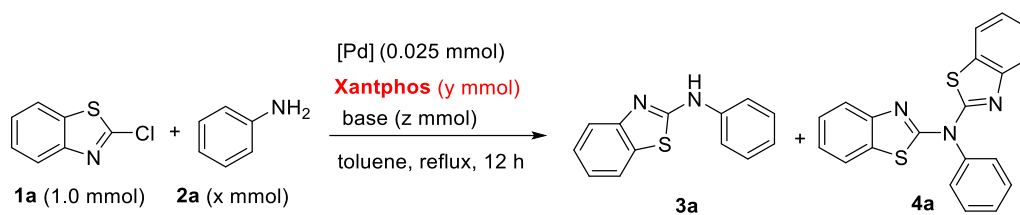

| Entry           | [Pd]                               | Base (z)                               | x           | y            | Yields (%) <sup>b</sup> |           |           |
|-----------------|------------------------------------|----------------------------------------|-------------|--------------|-------------------------|-----------|-----------|
|                 |                                    |                                        |             |              | <b>3a</b>               | <b>4a</b> | <b>1a</b> |
| 1               | Pd(OAc) <sub>2</sub>               | NaH (1.00)                             | 1.00        | 0.025        | 83                      | 11        | -         |
| 2               | Pd(OAc) <sub>2</sub>               | NaOtBu (1.00)                          | 1.00        | 0.025        | 71                      | 19        | 8         |
| 3               | Pd(OAc) <sub>2</sub>               | Cs <sub>2</sub> CO <sub>3</sub> (1.00) | 1.00        | 0.025        | 45                      | 52        | -         |
| 4               | Pd(OAc) <sub>2</sub>               | NaH (1.50)                             | 1.00        | 0.025        | 81                      | 15        | -         |
| 5               | Pd(OAc) <sub>2</sub>               | NaH (2.00)                             | 1.00        | 0.025        | 86                      | 10        | -         |
| 6               | PdCl <sub>2</sub>                  | NaH (1.00)                             | 1.00        | 0.025        | 76                      | 12        | -         |
| 7               | Pd <sub>2</sub> (dba) <sub>3</sub> | NaH (1.00)                             | 1.00        | 0.025        | 81                      | 11        | -         |
| <b>8</b>        | <b>Pd(OAc)<sub>2</sub></b>         | <b>NaH (1.00)</b>                      | <b>1.00</b> | <b>0.050</b> | <b>92</b>               | <b>5</b>  | -         |
| 9               | Pd(OAc) <sub>2</sub>               | NaH (1.00)                             | 1.00        | 0.075        | 93                      | 5         | -         |
| 10              | Pd(OAc) <sub>2</sub>               | NaH (1.00)                             | 0.50        | 0.005        | 86                      | 8         | 17        |
| 11              | Pd(OAc) <sub>2</sub>               | NaH (1.00)                             | 2.00        | 0.050        | 93                      | 5         | -         |
| 12              | Pd(OAc) <sub>2</sub>               | NaH (1.00)                             | 3.00        | 0.050        | 94                      | 4         | -         |
| 13 <sup>c</sup> | Pd(OAc) <sub>2</sub>               | NaH (1.00)                             | 1.00        | 0.025        | 72                      | 19        | -         |

<sup>[a]</sup> [Pd] (0.025 mmol), Xantphos (y mmol), base (z mmol), **1a** (1.00 mmol), **2a** (x mmol) and toluene (2.5 mL) were heated at reflux under argon for 12 h. <sup>[b]</sup> NMR yields using 1,3,5-trimethoxybenzene as an internal standard (average of two consistent runs); <sup>[c]</sup> Pd(OAc)<sub>2</sub> (0.0125 mmol) and Xantphos (0.025 mmol) were used.

**Table S3.** The reactions of 2-chlorobenzothiazole (**1a**) and 2-aminoaniline (**2h**) applying the **L15**-based systems<sup>a</sup>

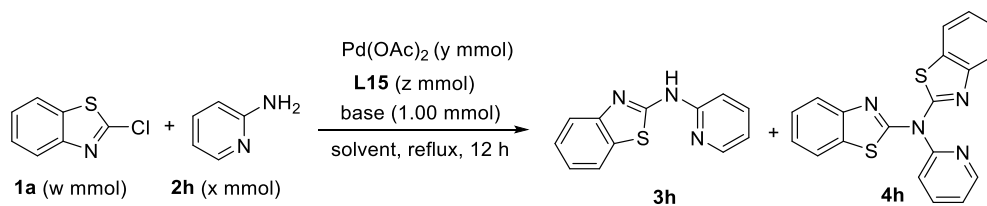

| Entry    | w           | x           | y            | z            | solvent          | Yields (%) <sup>a</sup> |           |
|----------|-------------|-------------|--------------|--------------|------------------|-------------------------|-----------|
|          |             |             |              |              |                  | <b>3h</b>               | <b>4h</b> |
| <b>1</b> | <b>1.00</b> | <b>1.00</b> | <b>0.025</b> | <b>0.025</b> | <b>toluene</b>   | <b>70</b>               | -         |
| 2        | 1.00        | 0.50        | 0.025        | 0.025        | toluene          | 64                      | -         |
| 3        | 2.00        | 0.50        | 0.025        | 0.025        | toluene          | 58                      | -         |
| 4        | 2.00        | 1.00        | 0.025        | 0.025        | toluene          | 46                      | -         |
| 5        | 1.00        | 1.00        | 0.050        | 0.050        | toluene          | 67                      | -         |
| 6        | 1.00        | 1.00        | 0.025        | 0.025        | <i>m</i> -xylene | 48                      | -         |

<sup>[a]</sup> NMR yields using 1,3,5-trimethoxybenzene as an internal standard (average of two consistent runs).

Inhibitory activity of compounds **6** and **7** was tested against SCR, with an initial concentration of 10  $\mu\text{M}$  for preliminary studies (as listed in Table S4). For compounds possessing inhibitory percentages no less than 50%, their  $\text{IC}_{50}$  values were further determined (as listed in Table S3). The bioassays revealed that the mono-arylated products generally demonstrated certain inhibitory activity against SCR (entries 1-11). Especially, compounds **6d-6g** and **6i** exhibited high potency with their  $\text{IC}_{50}$  values ranging from 0.13  $\mu\text{M}$  to 0.51  $\mu\text{M}$  (entries 4-7, 9), which was comparable with the commercial SCR inhibitor, azoxystrobin (entry 23). Unfortunately, all the di-arylated target compounds were unsuitable for the bioassay tests due to the poor solubility of these compounds in DMSO or DMSO/H<sub>2</sub>O (entries 12-22).

**Table S4.** Inhibitory activity of compounds **6** and **7** against SCR

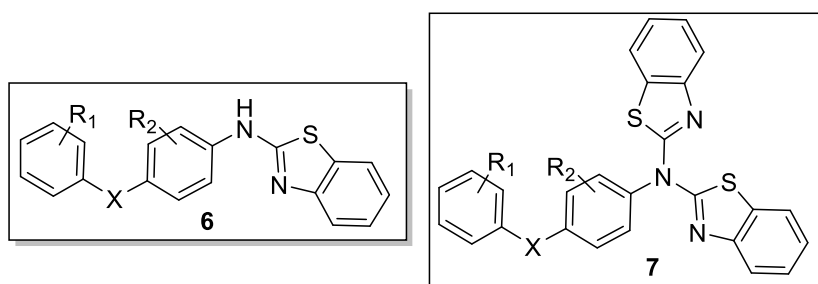

| Entry | Compound No.        | $\text{IC}_{50}$ ( $\mu\text{M}$ ) | Entry | Compound No. | $\text{IC}_{50}$ ( $\mu\text{M}$ ) |
|-------|---------------------|------------------------------------|-------|--------------|------------------------------------|
| 1     | <b>6a</b>           | >10                                | 12    | <b>7a</b>    | - <sup>a</sup>                     |
| 2     | <b>6b</b>           | >10                                | 13    | <b>7b</b>    | - <sup>a</sup>                     |
| 3     | <b>6c</b>           | >10                                | 14    | <b>7c</b>    | - <sup>a</sup>                     |
| 4     | <b>6d</b>           | 0.49 $\pm$ 0.04                    | 15    | <b>7d</b>    | - <sup>a</sup>                     |
| 5     | <b>6e</b>           | 0.13 $\pm$ 0.01                    | 16    | <b>7e</b>    | - <sup>a</sup>                     |
| 6     | <b>6f</b>           | 0.51 $\pm$ 0.04                    | 17    | <b>7f</b>    | - <sup>a</sup>                     |
| 7     | <b>6g</b>           | 0.29 $\pm$ 0.03                    | 18    | <b>7g</b>    | - <sup>a</sup>                     |
| 8     | <b>6h</b>           | >10                                | 19    | <b>7h</b>    | - <sup>a</sup>                     |
| 9     | <b>6i</b>           | 0.48 $\pm$ 0.02                    | 20    | <b>7i</b>    | - <sup>a</sup>                     |
| 10    | <b>6j</b>           | >10                                | 21    | <b>7j</b>    | - <sup>a</sup>                     |
| 11    | <b>6k</b>           | >10                                | 22    | <b>7k</b>    | - <sup>a</sup>                     |
| 23    | <b>Azoxystrobin</b> |                                    |       |              | 0.31 $\pm$ 0.02                    |

<sup>a</sup>  $\text{IC}_{50}$  values cannot be determined due to the poor solubility of these compounds in DMSO or DMSO/H<sub>2</sub>O.

|                                                                           |                                |                       |
|---------------------------------------------------------------------------|--------------------------------|-----------------------|
| 1,3-Dimethyl-1 <i>H</i> -benzo[ <i>d</i> ]imidazol-3-ium                  | iodide                         | (L1), <sup>[1]</sup>  |
| 3-ethyl-1-methyl-1 <i>H</i> -benzo[ <i>d</i> ]imidazol-3-ium              | iodide                         | (L2), <sup>[2]</sup>  |
| 3-isopropyl-1-methyl-1 <i>H</i> -benzo[ <i>d</i> ]imidazol-3-ium          | iodide                         | (L3), <sup>[2]</sup>  |
| 1,3,5,6-tetramethyl-1 <i>H</i> -benzo[ <i>d</i> ]imidazol-3-ium           | iodide                         | (L4), <sup>[1]</sup>  |
| 5,6-dichloro-1,3-dimethyl-1 <i>H</i> -benzo[ <i>d</i> ]imidazol-3-ium     | iodide                         | (L5), <sup>[2]</sup>  |
| 3-methyl-1-phenyl-1 <i>H</i> -benzo[ <i>d</i> ]imidazol-3-ium             | iodide                         | (L6), <sup>[3]</sup>  |
| 3-methyl-1-( <i>o</i> -tolyl)-1 <i>H</i> -benzo[ <i>d</i> ]imidazol-3-ium | iodide                         | (L7), <sup>[3]</sup>  |
| 3-methyl-1-( <i>m</i> -tolyl)-1 <i>H</i> -benzo[ <i>d</i> ]imidazol-3-ium | iodide                         | (L8), <sup>[3]</sup>  |
| 3-methyl-1-( <i>p</i> -tolyl)-1 <i>H</i> -benzo[ <i>d</i> ]imidazol-3-ium | iodide                         | (L9), <sup>[3]</sup>  |
| 3-methyl-1-(4-nitrophenyl)-1 <i>H</i> -benzo[ <i>d</i> ]imidazol-3-ium    | iodide                         | (L10), <sup>[3]</sup> |
| 1-(4-ethylphenyl)-3-methyl-1 <i>H</i> -benzo[ <i>d</i> ]imidazol-3-ium    | iodide                         | (L11), <sup>[3]</sup> |
| 3-ethyl-1-(4-ethylphenyl)-1 <i>H</i> -benzo[ <i>d</i> ]imidazol-3-ium     | iodide                         | (L12), <sup>[3]</sup> |
| 1-(4-ethylphenyl)-3-isopropyl-1 <i>H</i> -benzo[ <i>d</i> ]imidazol-3-ium | iodide                         | (L13), <sup>[3]</sup> |
| 2-(1-methyl-1 <i>H</i> -benzo[ <i>d</i> ]imidazol-3-ium-3-yl)acetate      |                                | (L14), <sup>[4]</sup> |
| 3-methyl-1-(pyridin-2-yl)-1 <i>H</i> -benzo[ <i>d</i> ]imidazol-3-ium     | iodide                         | (L15), <sup>[5]</sup> |
| 2-(4-aminophenoxy)benzotrile (5b), <sup>[6]</sup>                         | 4-(2,4-dichlorophenoxy)aniline | (5c), <sup>[6]</sup>  |
| 3-chloro-4-(2,4-dichlorophenoxy)aniline                                   |                                | (5d), <sup>[6]</sup>  |
| 3-chloro-4-(2-chloro-4-(trifluoromethyl)phenoxy)aniline                   |                                | (5e), <sup>[6]</sup>  |
| 3,5-dichloro-4-(2,4-dichlorophenoxy)aniline                               |                                | (5f), <sup>[6]</sup>  |
| 3-chloro-4-(2,4,6-trichlorophenoxy)aniline                                |                                | (5g), <sup>[6]</sup>  |
| 3-fluoro-4-(2,4,6-trichlorophenoxy)aniline                                |                                | (5h), <sup>[6]</sup>  |
| 3,5-dichloro-4-(2,4,6-trichlorophenoxy)aniline (5i), <sup>[6]</sup>       | 4-(naphthalen-2-yloxy)aniline  | (5j) <sup>[7]</sup>   |

(5j)<sup>[7]</sup> were synthesized using the literature procedures.

## References

- [1] H. Cheng, M. Q. Xiong, C. X. Cheng, H. J. Wang, Q. Lu, H. F. Liu, F. B. Yao, C. Chen and F. Verpoort, In situ Generated Ruthenium Catalyst Systems Bearing Diverse *N*-Heterocyclic Carbene Precursors for Atom-Economic Amide Synthesis from Alcohols and Amines. *Chem. Asian J.*, 2018, **13**, 440-448.

- [2] H. Cheng, M. Q. Xiong, N. Zhang, H. J. Wang, Y. Miao, W. Su, Y. Yuan, C. Chen and F. Verpoort, Efficient *N*-Heterocyclic Carbene/Ruthenium Catalytic Systems for the Alcohol Amidation with Amines: Involvement of Poly-Carbene Complexes? *ChemCatChem*, 2018, **10**, 4338-4345.
- [3] X. J. Wu, H. J. Wang, Z. Q. Yang, X. S. Tang, Y. Yuan, W. Su, C. Chen and F. Verpoort, Efficient and Phosphine-Free Bidentate *N*-heterocyclic Carbene/Ruthenium Catalytic Systems for the Dehydrogenative Amidation of Alcohols and Amines, *Org. Chem. Front.*, 2019, **6**, 563-570.
- [4] A. Allegue, M. Albert-Soriano and I. M. Pastor, A Comparative Study of Hydroxyl- and Carboxylate-functionalized Imidazolium and Benzimidazolium Salts as Precursors for *N*-heterocyclic Carbene Ligands, *Appl. Organomet. Chem.*, 2015, **29**, 624-632.
- [5] C. J. Stanton III, C. W. Machan, J. E. Vandezande, T. Jin, G. F. Majetich, H. F. Schaefer III, C. P. Kubiak, G. Li and J. Agarwal, Re(I) NHC Complexes for Electrocatalytic Conversion of CO<sub>2</sub>, *Inorg. Chem.*, 2016, **55**, 3136-3144.
- [6] H. Cheng, Y. Q. Shen, X. Y. Pan, Y. P. Hou, Q. Y. Wu and G. F. Yang, Discovery of 1,2,4-triazole-1,3-disulfonamides as Dual Inhibitors of Mitochondrial Complex II and Complex III. *New J. Chem.*, 2015, **39**, 7281-7292.
- [7] Q. F. Liu, F. B. Huang, X. J. Yuan, K. Wang, Y. Zou, J. H. Shen and Y. C. Xu, Structure-Guided Discovery of Novel, Potent, and Orally Bioavailable Inhibitors of Lipoprotein-Associated Phospholipase A2. *J. Med. Chem.*, 2017, **60**, 10231-10244.



## **2. Characterization data for compounds 3, 4, 6, 7 and 9**

*N*-phenylbenzo[*d*]thiazol-2-amine (**3a**). White solid, m.p. 159.5-160.3°C. Isolated yield: 86%. <sup>1</sup>H NMR (500 MHz, CDCl<sub>3</sub>) δ 8.87 (s, 1H), 7.63 (dd, *J* = 7.9, 1.2 Hz, 1H), 7.57 (dd, *J* = 8.2, 1.1 Hz, 1H), 7.53 – 7.47 (m, 2H), 7.44 – 7.37 (m, 2H), 7.32 (ddd, *J* = 8.2, 7.3, 1.3 Hz, 1H), 7.23 – 7.11 (m, 2H). <sup>13</sup>C NMR (126 MHz, CDCl<sub>3</sub>) δ 164.4, 151.5, 139.8, 130.0, 129.5, 126.1, 124.3, 122.4, 120.8, 120.1, 119.5. HRMS (ESI): calculated for C<sub>13</sub>H<sub>11</sub>N<sub>2</sub>S [M+H]<sup>+</sup>: 227.06375; Found: 227.06369.

*N*-(*p*-tolyl)benzo[*d*]thiazol-2-amine (**3b**). White solid, m.p. 182.1-182.6°C. Isolated yield: 88%. <sup>1</sup>H NMR (500 MHz, CDCl<sub>3</sub>) δ 8.39 (s, 1H), 7.61 (dd, *J* = 7.9, 1.1 Hz, 1H), 7.55 (d, *J* = 8.0 Hz, 1H), 7.37 (d, *J* = 8.3 Hz, 2H), 7.31 (t, *J* = 7.7 Hz, 1H), 7.21 (d, *J* = 8.0 Hz, 2H), 7.13 (t, *J* = 7.6 Hz, 1H), 2.37 (s, 3H). <sup>13</sup>C NMR (126 MHz, CDCl<sub>3</sub>) δ 165.3, 151.6, 137.3, 134.5, 130.1, 130.0, 126.1, 122.2, 120.9, 120.8, 119.3, 20.9. HRMS (ESI): calculated for C<sub>14</sub>H<sub>13</sub>N<sub>2</sub>S [M+H]<sup>+</sup>: 241.07940; Found: 241.07929.

*N*-(4-(*tert*-butyl)phenyl)benzo[*d*]thiazol-2-amine (**3c**). White solid, m.p. 136.3-137.1°C. Isolated yield: 85%. <sup>1</sup>H NMR (500 MHz, CDCl<sub>3</sub>) δ 8.12 (s, 1H), 7.62 (dd, *J* = 8.0, 1.2 Hz, 1H), 7.59 (dd, *J* = 8.1, 1.0 Hz, 1H), 7.41 (s, 4H), 7.33 (ddd, *J* = 8.3, 7.3, 1.2 Hz, 1H), 7.14 (td, *J* = 7.6, 1.2 Hz, 1H), 1.34 (s, 9H). <sup>13</sup>C NMR (126 MHz, CDCl<sub>3</sub>) δ 164.8, 151.6, 147.5, 137.1, 130.0, 126.4, 126.1, 122.2, 120.8, 120.1, 119.3, 34.4, 31.4. HRMS (ESI): calculated for C<sub>17</sub>H<sub>19</sub>N<sub>2</sub>S [M+H]<sup>+</sup>: 283.12635; Found: 283.12622.

*N*-(4-fluorophenyl)benzo[*d*]thiazol-2-amine (**3d**). White solid, m.p. 201.2-202.0 °C. Isolated yield: 80%. <sup>1</sup>H NMR (500 MHz, DMSO-*d*<sub>6</sub>) δ 10.51 (s, 1H), 7.82 (dd, *J* = 9.5, 5.7 Hz, 3H), 7.60 (d, *J* = 8.1 Hz, 1H), 7.33 (t, *J* = 7.7 Hz, 1H), 7.22 (t, *J* = 8.7 Hz, 2H), 7.16 (t, *J* = 7.6 Hz, 1H). <sup>13</sup>C NMR (126 MHz, DMSO-*d*<sub>6</sub>) δ 162.1, 157.8 (d, *J* = 238.7 Hz), 152.5, 137.6, 130.4, 126.3, 122.7, 121.5, 119.8 (d, *J* = 7.6 Hz), 119.6, 116.0 (d, *J* = 22.3 Hz). HRMS (ESI): calculated for C<sub>13</sub>H<sub>10</sub>FN<sub>2</sub>S [M+H]<sup>+</sup>: 245.05432; Found: 245.05421.

*N*-(4-(trifluoromethyl)phenyl)benzo[*d*]thiazol-2-amine (**3e**). White solid, m.p. 191.8-192.4°C. Isolated yield: 56%. <sup>1</sup>H NMR (500 MHz, CDCl<sub>3</sub>) δ 8.11 (s, 1H), 7.77

– 7.59 (m, 6H), 7.40 (t,  $J = 7.6$  Hz, 1H), 7.23 (t,  $J = 7.5$  Hz, 1H).  $^{13}\text{C}$  NMR (126 MHz,  $\text{CDCl}_3$ )  $\delta$  161.8, 151.0, 142.6, 130.0, 126.7 (q,  $J = 3.7$  Hz), 126.5, 125.2 (q,  $J = 32.8$  Hz), 124.1 (d,  $J = 271.6$  Hz), 123.3, 120.9, 120.1, 118.2. HRMS (ESI): calculated for  $\text{C}_{14}\text{H}_{10}\text{F}_3\text{N}_2\text{S}$   $[\text{M}+\text{H}]^+$ : 295.05113; Found: 295.05095.

*N*-(*m*-tolyl)benzo[*d*]thiazol-2-amine (**3f**). White solid, m.p. 122.4-123.2°C. Isolated yield: 81%.  $^1\text{H}$  NMR (500 MHz,  $\text{CDCl}_3$ )  $\delta$  8.98 (s, 1H), 7.62 (dd,  $J = 7.9, 1.2$  Hz, 1H), 7.56 (dd,  $J = 8.1, 1.1$  Hz, 1H), 7.37 – 7.25 (m, 4H), 7.14 (td,  $J = 7.6, 1.2$  Hz, 1H), 6.99 (d,  $J = 6.0$  Hz, 1H), 2.38 (s, 3H).  $^{13}\text{C}$  NMR (126 MHz,  $\text{CDCl}_3$ )  $\delta$  165.1, 151.3, 139.8, 139.6, 129.9, 129.4, 126.1, 125.3, 122.2, 121.1, 120.8, 119.2, 117.4, 21.5. HRMS (ESI): calculated for  $\text{C}_{14}\text{H}_{13}\text{N}_2\text{S}$   $[\text{M}+\text{H}]^+$ : 241.07940; Found: 241.07928.

*N*-(*o*-tolyl)benzo[*d*]thiazol-2-amine (**3g**). White solid, m.p. 119.4-120.0°C. Isolated yield: 55%.  $^1\text{H}$  NMR (500 MHz,  $\text{CDCl}_3$ )  $\delta$  8.38 (s, 1H), 7.65 (dd,  $J = 7.2, 2.0$  Hz, 1H), 7.57 (dd,  $J = 7.8, 1.2$  Hz, 1H), 7.45 (dd,  $J = 8.1, 1.1$  Hz, 1H), 7.32 – 7.26 (m, 3H), 7.20 (td,  $J = 7.3, 1.3$  Hz, 1H), 7.11 (td,  $J = 7.6, 1.2$  Hz, 1H), 2.36 (s, 3H).  $^{13}\text{C}$  NMR (126 MHz,  $\text{CDCl}_3$ )  $\delta$  166.9, 151.7, 138.2, 132.2, 131.2, 130.2, 127.3, 126.3, 126.0, 124.0, 122.0, 120.8, 118.9, 17.9. HRMS (ESI): calculated for  $\text{C}_{14}\text{H}_{13}\text{N}_2\text{S}$   $[\text{M}+\text{H}]^+$ : 241.07940; Found: 241.07932.

*N*-(pyridin-2-yl)benzo[*d*]thiazol-2-amine (**3h**). White solid, m.p. 239.1-239.9°C. Isolated yields: 41% for Condition A and 70% for Condition B.  $^1\text{H}$  NMR (500 MHz,  $\text{DMSO}-d_6$ )  $\delta$  11.57 (s, 1H), 8.36 (d,  $J = 5.0$  Hz, 1H), 7.90 (d,  $J = 7.8$  Hz, 1H), 7.86 – 7.71 (m, 1H), 7.62 (d,  $J = 8.0$  Hz, 1H), 7.37 (t,  $J = 7.6$  Hz, 1H), 7.28 – 7.11 (m, 2H), 7.01 (dd,  $J = 7.2, 5.0$  Hz, 1H).  $^{13}\text{C}$  NMR (126 MHz,  $\text{DMSO}-d_6$ )  $\delta$  159.8, 152.1, 149.9, 147.0, 138.8, 132.1, 126.2, 122.5, 121.6, 119.6, 117.3, 111.7. HRMS (ESI): calculated for  $\text{C}_{12}\text{H}_{10}\text{N}_3\text{S}$   $[\text{M}+\text{H}]^+$ : 228.05899; Found: 228.05891.

*6*-Methyl-*N*-phenylbenzo[*d*]thiazol-2-amine (**3i**). White solid, m.p. 166.1-167.0°C. Isolated yield: 91%.  $^1\text{H}$  NMR (500 MHz,  $\text{CDCl}_3$ )  $\delta$  8.07 (s, 1H), 7.52 – 7.46 (m, 3H), 7.43 (s, 1H), 7.42 – 7.36 (m, 2H), 7.14 (tt,  $J = 7.1, 1.1$  Hz, 2H), 2.42 (s, 3H).  $^{13}\text{C}$  NMR (126 MHz,  $\text{CDCl}_3$ )  $\delta$  163.2, 149.4, 139.9, 132.3, 130.1, 129.5, 127.4, 124.0, 120.8, 119.7, 119.2, 21.3. HRMS (ESI): calculated for  $\text{C}_{14}\text{H}_{13}\text{N}_2\text{S}$   $[\text{M}+\text{H}]^+$ : 241.07940; Found: 241.07924.

*6-Methoxy-N-phenylbenzo[d]thiazol-2-amine (3j)*. White solid, m.p. 115.0-115.8°C. Isolated yield: 82%. <sup>1</sup>H NMR (500 MHz, CDCl<sub>3</sub>) δ 7.61 (s, 1H), 7.53 (d, *J* = 8.8 Hz, 1H), 7.49 (dd, *J* = 8.6, 1.1 Hz, 2H), 7.38 (dd, *J* = 8.5, 7.3 Hz, 2H), 7.17 (d, *J* = 2.6 Hz, 1H), 7.13 (tt, *J* = 7.4, 1.2 Hz, 1H), 6.95 (dd, *J* = 8.8, 2.6 Hz, 1H), 3.84 (s, 3H). <sup>13</sup>C NMR (126 MHz, CDCl<sub>3</sub>) δ 161.8, 155.9, 145.9, 139.9, 131.2, 129.5, 123.8, 120.2, 119.4, 113.9, 105.1, 55.9. HRMS (ESI): calculated for C<sub>14</sub>H<sub>13</sub>N<sub>2</sub>OS [M+H]<sup>+</sup>: 257.07431; Found: 257.07420.

*6-Chloro-N-phenylbenzo[d]thiazol-2-amine (3k)*. White solid, m.p. 190.9-191.7°C. Isolated yield: 77%. In addition, 10% of the di-substituted product (**4k**) was also isolated. <sup>1</sup>H NMR (500 MHz, CDCl<sub>3</sub>) δ 7.70 (s, 1H), 7.60 (d, *J* = 2.1 Hz, 1H), 7.52 (d, *J* = 8.7 Hz, 1H), 7.49 (d, *J* = 7.8 Hz, 2H), 7.41 (t, *J* = 7.8 Hz, 2H), 7.30 (dd, *J* = 8.7, 2.2 Hz, 1H), 7.18 (t, *J* = 7.4 Hz, 1H). <sup>13</sup>C NMR (126 MHz, CDCl<sub>3</sub>) δ 164.3, 150.3, 139.4, 131.3, 129.6, 127.7, 126.7, 124.6, 120.5, 120.2, 120.2. HRMS (ESI): calculated for C<sub>13</sub>H<sub>10</sub>ClN<sub>2</sub>S [M+H]<sup>+</sup>: 261.02477; Found: 261.02468.

*N-(benzo[d]thiazol-2-yl)-N-phenylbenzo[d]thiazol-2-amine (4a)*. White solid, m.p. 202.8-204.1°C. Isolated yield: 91%. <sup>1</sup>H NMR (500 MHz, CDCl<sub>3</sub>) δ 7.79 (d, *J* = 8.0 Hz, 2H), 7.72 (dd, *J* = 7.9, 1.2 Hz, 2H), 7.67 – 7.59 (m, 3H), 7.58 – 7.52 (m, 2H), 7.40 (ddd, *J* = 8.3, 7.2, 1.3 Hz, 2H), 7.27 – 7.23 (m, 2H). <sup>13</sup>C NMR (126 MHz, CDCl<sub>3</sub>) δ 162.8, 150.1, 141.7, 132.5, 130.5, 130.0, 129.3, 126.1, 123.5, 121.2, 120.7. HRMS (APCI): calculated for C<sub>20</sub>H<sub>14</sub>N<sub>3</sub>S<sub>2</sub> [M+H]<sup>+</sup>: 360.06237; Found: 360.06173.

*N-(benzo[d]thiazol-2-yl)-N-(p-tolyl)benzo[d]thiazol-2-amine (4b)*. White solid, m.p. 189.5-190.3°C. Isolated yield: 95%. <sup>1</sup>H NMR (500 MHz, CDCl<sub>3</sub>) δ 7.80 (d, *J* = 8.1 Hz, 2H), 7.72 (d, *J* = 7.8 Hz, 2H), 7.43 (s, 4H), 7.39 (ddd, *J* = 8.4, 7.3, 1.2 Hz, 2H), 7.27 – 7.21 (m, 2H), 2.51 (s, 3H). <sup>13</sup>C NMR (126 MHz, CDCl<sub>3</sub>) δ 163.0, 150.2, 140.1, 139.2, 132.5, 131.1, 129.0, 126.1, 123.4, 121.2, 120.7, 21.5. HRMS (APCI): calculated for C<sub>21</sub>H<sub>16</sub>N<sub>3</sub>S<sub>2</sub> [M+H]<sup>+</sup>: 374.07802; Found: 374.07760.

*N-(benzo[d]thiazol-2-yl)-N-(4-(tert-butyl)phenyl)benzo[d]thiazol-2-amine (4c)*. White solid, m.p. 272.5-273.6°C. Isolated yield: 93%. <sup>1</sup>H NMR (500 MHz, CDCl<sub>3</sub>) δ 7.80 (d, *J* = 8.1 Hz, 2H), 7.72 (dd, *J* = 7.9, 1.2 Hz, 2H), 7.66 – 7.61 (m, 2H), 7.49 – 7.43 (m, 2H), 7.40 (ddd, *J* = 8.2, 7.2, 1.3 Hz, 2H), 7.28 – 7.21 (m, 2H), 1.43 (s, 9H).

$^{13}\text{C}$  NMR (126 MHz,  $\text{CDCl}_3$ )  $\delta$  163.1, 153.0, 150.1, 139.1, 132.5, 128.6, 127.4, 126.0, 123.4, 121.2, 120.7, 35.0, 31.4. HRMS (APCI): calculated for  $\text{C}_{24}\text{H}_{22}\text{N}_3\text{S}_2$   $[\text{M}+\text{H}]^+$ : 416.12497; Found: 416.12451.

*N*-(benzo[d]thiazol-2-yl)-*N*-(4-fluorophenyl)benzo[d]thiazol-2-amine (**4d**). White solid, m.p. 200.0-200.8 °C. Isolated yield: 90%.  $^1\text{H}$  NMR (500 MHz,  $\text{CDCl}_3$ )  $\delta$  7.79 (d,  $J$  = 8.1 Hz, 2H), 7.73 (dd,  $J$  = 7.9, 1.1 Hz, 2H), 7.58 – 7.50 (m, 2H), 7.41 (ddd,  $J$  = 8.3, 7.3, 1.2 Hz, 2H), 7.34 – 7.29 (m, 2H), 7.29 – 7.22 (m, 2H).  $^{13}\text{C}$  NMR (126 MHz,  $\text{CDCl}_3$ )  $\delta$  163.1 (d,  $J$  = 250.6 Hz), 162.7, 150.0, 137.5 (d,  $J$  = 3.4 Hz), 132.4, 131.4 (d,  $J$  = 9.0 Hz), 126.2, 123.6, 121.3, 120.8, 117.6 (d,  $J$  = 23.1 Hz). HRMS (APCI): calculated for  $\text{C}_{20}\text{H}_{13}\text{FN}_3\text{S}_2$   $[\text{M}+\text{H}]^+$ : 378.05294; Found: 378.05236.

*N*-(benzo[d]thiazol-2-yl)-*N*-(4-(trifluoromethyl)phenyl)benzo[d]thiazol-2-amine (**4e**). White solid, m.p. 230.3-231.1 °C. Isolated yield: 30%.  $^1\text{H}$  NMR (500 MHz,  $\text{CDCl}_3$ )  $\delta$  7.90 (d,  $J$  = 8.2 Hz, 2H), 7.80 (d,  $J$  = 8.1 Hz, 2H), 7.74 (dd,  $J$  = 8.0, 1.2 Hz, 2H), 7.70 (d,  $J$  = 8.1 Hz, 2H), 7.42 (ddd,  $J$  = 8.4, 7.3, 1.3 Hz, 2H), 7.27 (td,  $J$  = 7.7, 1.2 Hz, 2H).  $^{13}\text{C}$  NMR (126 MHz,  $\text{CDCl}_3$ )  $\delta$  162.1, 149.9, 144.5, 132.4, 131.9 (q,  $J$  = 33.1 Hz), 130.1, 127.7 (q,  $J$  = 3.7 Hz), 126.9, 126.3, 123.7 (q,  $J$  = 272.6 Hz), 121.3, 120.8. HRMS (APCI): calculated for  $\text{C}_{21}\text{H}_{13}\text{F}_3\text{N}_3\text{S}_2$   $[\text{M}+\text{H}]^+$ : 428.04975; Found: 428.04931.

*N*-(benzo[d]thiazol-2-yl)-*N*-(*m*-tolyl)benzo[d]thiazol-2-amine (**4f**). White solid, m.p. 194.5-195.2°C. Isolated yield: 80%.  $^1\text{H}$  NMR (500 MHz,  $\text{CDCl}_3$ )  $\delta$  7.80 (dd,  $J$  = 8.4, 1.1 Hz, 2H), 7.72 (dd,  $J$  = 7.8, 1.1 Hz, 2H), 7.53 (dd,  $J$  = 9.0, 7.3 Hz, 1H), 7.44 – 7.37 (m, 3H), 7.37 – 7.33 (m, 2H), 7.28 – 7.21 (m, 2H), 2.47 (s, 3H).  $^{13}\text{C}$  NMR (126 MHz,  $\text{CDCl}_3$ )  $\delta$  162.9, 150.1, 141.7, 140.6, 132.5, 130.8, 130.2, 129.7, 126.2, 126.1, 123.4, 121.2, 120.7, 21.5. HRMS (APCI):  $\text{C}_{21}\text{H}_{16}\text{N}_3\text{S}_2$   $[\text{M}+\text{H}]^+$ : calculated for 374.07802; Found: 374.07772.

*N*-(benzo[d]thiazol-2-yl)-*N*-(*o*-tolyl)benzo[d]thiazol-2-amine (**4g**). White solid, m.p. 193.6-194.8°C. Isolated yield: 62%.  $^1\text{H}$  NMR (500 MHz,  $\text{CDCl}_3$ )  $\delta$  7.80 (d,  $J$  = 8.0 Hz, 2H), 7.73 (dd,  $J$  = 7.9, 1.2 Hz, 2H), 7.57 – 7.44 (m, 4H), 7.40 (ddd,  $J$  = 8.3, 7.2, 1.3 Hz, 2H), 7.27 – 7.23 (m, 2H), 2.19 (s, 3H).  $^{13}\text{C}$  NMR (126 MHz,  $\text{CDCl}_3$ )  $\delta$  162.2, 150.3, 140.6, 137.4, 132.5, 132.2, 130.4, 129.5, 128.1, 126.1, 123.4, 121.2, 120.8,

17.5. HRMS (APCI): calculated for  $C_{21}H_{16}N_3S_2$   $[M+H]^+$ : 374.07802; Found: 374.07748.

*6-Methyl-N-(6-methylbenzo[d]thiazol-2-yl)-N-phenylbenzo[d]thiazol-2-amine (4i)*. White solid, m.p. 192.0-193.6°C. Isolated yield: 72%.  $^1H$  NMR (500 MHz,  $CDCl_3$ )  $\delta$  7.67 (d,  $J = 8.3$  Hz, 2H), 7.65 – 7.58 (m, 3H), 7.55 (dd,  $J = 6.7, 1.8$  Hz, 2H), 7.50 (s, 2H), 7.20 (dd,  $J = 8.2, 1.7$  Hz, 2H), 2.44 (s, 6H).  $^{13}C$  NMR (126 MHz,  $CDCl_3$ )  $\delta$  162.2, 148.1, 141.8, 133.3, 132.5, 130.4, 129.8, 129.4, 127.4, 120.8, 120.6, 21.5. HRMS (APCI): calculated for  $C_{22}H_{18}N_3S_2$   $[M+H]^+$ : 388.09367; Found: 388.09298.

*6-Methoxy-N-(6-methoxybenzo[d]thiazol-2-yl)-N-phenylbenzo[d]thiazol-2-amine (4j)*. White solid, m.p. 165.7-168.4 °C. Isolated yield: 56%. In addition, 26% of the mono-substituted product (**3j**) was also obtained.  $^1H$  NMR (500 MHz,  $CDCl_3$ )  $\delta$  7.67 (d,  $J = 8.9$  Hz, 2H), 7.65 – 7.56 (m, 3H), 7.54 (dd,  $J = 8.2, 1.5$  Hz, 2H), 7.20 (d,  $J = 2.6$  Hz, 2H), 6.99 (dd,  $J = 8.9, 2.6$  Hz, 2H), 3.84 (s, 6H).  $^{13}C$  NMR (126 MHz,  $CDCl_3$ )  $\delta$  161.0, 156.3, 144.4, 141.7, 133.5, 130.4, 129.8, 129.4, 121.7, 114.4, 104.3, 55.8. HRMS (APCI): calculated for  $C_{22}H_{18}N_3O_2S_2$   $[M+H]^+$ : 420.08349; Found: 420.08270.

*6-Chloro-N-(6-chlorobenzo[d]thiazol-2-yl)-N-phenylbenzo[d]thiazol-2-amine (4k)*. White solid, m.p. 244.0-245.0°C. Isolated yield: 84%.  $^1H$  NMR (500 MHz,  $DMSO-d_6$ )  $\delta$  8.12 (d,  $J = 2.3$  Hz, 2H), 7.75 – 7.65 (m, 7H), 7.47 (d,  $J = 2.2$  Hz, 1H), 7.45 (d,  $J = 2.2$  Hz, 1H).  $^{13}C$  NMR (126 MHz,  $DMSO-d_6$ )  $\delta$  163.6, 148.8, 141.6, 134.0, 131.1, 130.8, 129.8, 128.1, 127.3, 122.2, 121.8. HRMS (APCI): calculated for  $C_{20}H_{12}Cl_2N_3S_2$   $[M+H]^+$ : 427.98442; Found: 427.98388.

*Diethyl 2,2'-(phenylazanediyl)bis(benzo[d]thiazole-6-carboxylate) (4l)*. White solid, m.p. 238.7-239.3°C. Isolated yields: 55% for Condition A and 75% for Condition B.  $^1H$  NMR (500 MHz,  $CDCl_3$ )  $\delta$  8.46 (d,  $J = 1.8$  Hz, 2H), 8.11 (dd,  $J = 8.5, 1.7$  Hz, 2H), 7.82 (d,  $J = 8.5$  Hz, 2H), 7.73 – 7.63 (m, 3H), 7.56 (dd,  $J = 7.8, 1.9$  Hz, 2H), 4.41 (q,  $J = 7.1$  Hz, 4H), 1.42 (t,  $J = 7.1$  Hz, 6H).  $^{13}C$  NMR (126 MHz,  $CDCl_3$ )  $\delta$  166.2, 165.1, 153.3, 141.2, 132.4, 130.7, 130.4, 129.1, 127.7, 125.8, 123.0, 120.9, 61.1, 14.4. HRMS (APCI): calculated for  $C_{26}H_{22}N_3O_4S_2$   $[M+H]^+$ : 504.10462; Found: 504.10369.

*N-(4-phenoxyphenyl)benzo[d]thiazol-2-amine (6a)*. White solid, m.p.

158.8-159.4°C. Isolated yield: 88%. <sup>1</sup>H NMR (500 MHz, CDCl<sub>3</sub>) δ 7.99 (s, 1H), 7.62 (d, *J* = 7.9 Hz, 1H), 7.58 (d, *J* = 8.1 Hz, 1H), 7.48 (d, *J* = 8.8 Hz, 2H), 7.38 – 7.29 (m, 3H), 7.15 (t, *J* = 7.9 Hz, 1H), 7.11 (t, *J* = 7.3 Hz, 1H), 7.09 – 6.98 (m, 4H). <sup>13</sup>C NMR (126 MHz, CDCl<sub>3</sub>) δ 164.8, 157.3, 154.1, 151.7, 135.2, 130.1, 129.8, 126.1, 123.3, 122.5, 122.4, 120.8, 120.0, 119.5, 118.7. HRMS (ESI): calculated for C<sub>19</sub>H<sub>15</sub>N<sub>2</sub>OS [M+H]<sup>+</sup>: 319.08996; Found: 319.08979.

*2-(4-(Benzo[d]thiazol-2-ylamino)phenoxy)benzonitrile (6b)*. White solid, m.p. 174.3-174.9°C. Isolated yield: 72%. <sup>1</sup>H NMR (500 MHz, DMSO-*d*<sub>6</sub>) δ 10.57 (s, 1H), 7.95 – 7.86 (m, 3H), 7.82 (dd, *J* = 7.9, 1.2 Hz, 1H), 7.64 (ddd, *J* = 8.9, 7.4, 1.7 Hz, 1H), 7.61 (d, *J* = 8.0 Hz, 1H), 7.33 (td, *J* = 7.7, 1.3 Hz, 1H), 7.25 (t, *J* = 7.6 Hz, 1H), 7.23 – 7.19 (m, 2H), 7.17 (td, *J* = 7.6, 1.2 Hz, 1H), 6.91 (d, *J* = 8.5 Hz, 1H). <sup>13</sup>C NMR (126 MHz, DMSO-*d*<sub>6</sub>) δ 162.6, 160.4, 152.8, 149.9, 138.7, 136.2, 134.9, 130.8, 126.9, 124.2, 123.3, 121.9, 121.5, 120.5, 120.1, 117.4, 117.0, 102.9. HRMS (ESI): calculated for C<sub>20</sub>H<sub>14</sub>N<sub>3</sub>OS [M+H]<sup>+</sup>: 344.08521; Found: 344.08515.

*N-(4-(2,4-dichlorophenoxy)phenyl)benzo[d]thiazol-2-amine (6c)*. Brown solid, m.p. 184.9-186.5°C. Isolated yield: 75%. <sup>1</sup>H NMR (500 MHz, DMSO-*d*<sub>6</sub>) δ 10.52 (s, 1H), 7.88 – 7.77 (m, 3H), 7.75 (d, *J* = 2.6 Hz, 1H), 7.58 (d, *J* = 8.0 Hz, 1H), 7.39 (dd, *J* = 8.8, 2.6 Hz, 1H), 7.32 (td, *J* = 7.6, 1.4 Hz, 1H), 7.15 (td, *J* = 7.7, 1.2 Hz, 1H), 7.08 (d, *J* = 9.0 Hz, 2H), 6.99 (d, *J* = 8.9 Hz, 1H). <sup>13</sup>C NMR (126 MHz, DMSO-*d*<sub>6</sub>) δ 162.1, 152.5, 152.4, 150.6, 137.7, 130.5, 130.5, 129.1, 128.0, 126.4, 125.1, 122.7, 121.5, 120.9, 119.9, 119.8, 119.6. HRMS (ESI): calculated for C<sub>19</sub>H<sub>13</sub>Cl<sub>2</sub>N<sub>2</sub>OS [M+H]<sup>+</sup>: 387.01202; Found: 387.01194.

*N-(3-chloro-4-(2,4-dichlorophenoxy)phenyl)benzo[d]thiazol-2-amine (6d)*. White solid, m.p. 165.0-165.8°C. Isolated yield: 71%. <sup>1</sup>H NMR (500 MHz, CDCl<sub>3</sub>) δ 7.96 (s, 1H), 7.79 (d, *J* = 2.7 Hz, 1H), 7.65 (dd, *J* = 7.6, 5.3 Hz, 2H), 7.48 (d, *J* = 2.5 Hz, 1H), 7.41 (dd, *J* = 8.8, 2.7 Hz, 1H), 7.40 – 7.33 (m, 1H), 7.19 (d, *J* = 7.7 Hz, 1H), 7.17 (dd, *J* = 8.8, 2.5 Hz, 1H), 6.96 (d, *J* = 8.8 Hz, 1H), 6.76 (d, *J* = 8.8 Hz, 1H). <sup>13</sup>C NMR (126 MHz, CDCl<sub>3</sub>) δ 162.9, 151.5, 151.4, 147.6, 137.1, 130.5, 130.0, 128.9, 127.9, 126.4, 126.4, 125.3, 123.0, 122.0, 121.1, 120.9, 119.9, 119.3, 119.1. HRMS (ESI): calculated for C<sub>19</sub>H<sub>12</sub>Cl<sub>3</sub>N<sub>2</sub>OS [M+H]<sup>+</sup>: 420.97304; Found: 420.97287.

*N*-(3,5-dichloro-4-(2,4-dichlorophenoxy)phenyl)benzo[d]thiazol-2-amine (**6e**).

White solid, m.p. 192.1-193.0°C. Isolated yield: 82%. <sup>1</sup>H NMR (500 MHz, CDCl<sub>3</sub>) δ 7.76 (s, 2H), 7.74 (d, *J* = 8.0 Hz, 1H), 7.68 (d, *J* = 7.7 Hz, 1H), 7.48 (d, *J* = 2.5 Hz, 1H), 7.43 – 7.39 (m, 1H), 7.35 (s, 1H), 7.26 – 7.22 (m, 1H), 7.09 (dd, *J* = 8.8, 2.5 Hz, 1H), 6.45 (d, *J* = 8.8 Hz, 1H). <sup>13</sup>C NMR (126 MHz, CDCl<sub>3</sub>) δ 161.3, 151.3, 151.2, 142.0, 138.4, 130.5, 130.1, 130.0, 127.8, 127.5, 126.5, 123.5, 123.4, 120.9, 120.3, 119.0, 115.0. HRMS (ESI): calculated for C<sub>19</sub>H<sub>11</sub>Cl<sub>4</sub>N<sub>2</sub>OS [M+H]<sup>+</sup>: 454.93407; Found: 454.93389.

*N*-(3-chloro-4-(2,4,6-trichlorophenoxy)phenyl)benzo[d]thiazol-2-amine (**6f**). White solid, m.p. 201.5-202.9°C. Isolated yield: 83%. <sup>1</sup>H NMR (500 MHz, DMSO-*d*<sub>6</sub>) δ 10.58 (s, 1H), 8.20 (d, *J* = 2.6 Hz, 1H), 7.91 (s, 2H), 7.81 (dd, *J* = 7.9, 1.3 Hz, 1H), 7.61 (d, *J* = 8.0 Hz, 1H), 7.47 (dd, *J* = 9.0, 2.7 Hz, 1H), 7.34 (ddd, *J* = 8.3, 7.4, 1.3 Hz, 1H), 7.17 (td, *J* = 7.6, 1.2 Hz, 1H), 6.66 (d, *J* = 9.0 Hz, 1H). <sup>13</sup>C NMR (126 MHz, DMSO-*d*<sub>6</sub>) δ 161.9, 152.3, 146.7, 146.0, 137.2, 131.4, 130.4, 130.0, 129.8, 126.4, 122.9, 121.6, 121.6, 119.9, 119.8, 118.2, 115.5. HRMS (ESI): calculated for C<sub>19</sub>H<sub>11</sub>Cl<sub>4</sub>N<sub>2</sub>OS [M+H]<sup>+</sup>: 454.93407; Found: 454.93380.

*N*-(3-fluoro-4-(2,4,6-trichlorophenoxy)phenyl)benzo[d]thiazol-2-amine (**6g**). White solid, m.p. 205.3-207.0°C. Isolated yield: 81%. <sup>1</sup>H NMR (500 MHz, DMSO-*d*<sub>6</sub>) δ 10.65 (s, 1H), 8.14 – 8.00 (m, 1H), 7.89 (s, 2H), 7.81 (d, *J* = 7.9 Hz, 1H), 7.61 (d, *J* = 8.1 Hz, 1H), 7.34 (t, *J* = 7.7 Hz, 1H), 7.28 (d, *J* = 9.1 Hz, 1H), 7.17 (t, *J* = 7.6 Hz, 1H), 6.74 (t, *J* = 9.2 Hz, 1H). <sup>13</sup>C NMR (126 MHz, DMSO-*d*<sub>6</sub>) δ 161.8, 152.3, 151.1 (d, *J* = 243.7 Hz), 146.0, 138.6 (d, *J* = 11.5 Hz), 137.2 (d, *J* = 9.8 Hz), 131.3, 130.4, 130.0, 129.8, 126.4, 122.9, 121.6, 119.8, 116.6, 114.3 (d, *J* = 3.3 Hz), 107.2 (d, *J* = 22.7 Hz). HRMS (ESI): calculated for C<sub>19</sub>H<sub>10</sub>Cl<sub>3</sub>FN<sub>2</sub>OS [M+H]<sup>+</sup>: 438.96362; Found: 438.96341.

*N*-(3,5-dichloro-4-(2,4,6-trichlorophenoxy)phenyl)benzo[d]thiazol-2-amine (**6h**). Brown solid, m.p. 192.5-193.1°C. Isolated yield: 80%. <sup>1</sup>H NMR (500 MHz, CDCl<sub>3</sub>) δ 10.83 (s, 1H), 7.95 (s, 2H), 7.85 (d, *J* = 7.8 Hz, 1H), 7.76 (s, 2H), 7.68 (d, *J* = 8.0 Hz, 1H), 7.36 (t, *J* = 7.6 Hz, 1H), 7.21 (t, *J* = 7.5 Hz, 1H). <sup>13</sup>C NMR (126 MHz, CDCl<sub>3</sub>) δ 161.4, 152.0, 147.4, 142.0, 138.5, 130.4, 129.9, 129.9, <sup>13</sup>C NMR (126 MHz, CDCl<sub>3</sub>) δ 161.4, 152.0, 147.4, 142.0, 138.5, 130.4, 129.9, 129.9,

129.3, 126.6, 126.1, 123.4, 121.7, 120.3, 118.2. HRMS (ESI): calculated for  $C_{19}H_{10}Cl_5N_2OS$   $[M+H]^+$ ; Exact Mass: 488.89510; Found: 488.89477.

*N*-(3,5-difluoro-4-(2,4,6-trichlorophenoxy)phenyl)benzo[d]thiazol-2-amine (**6i**).

White solid, m.p. 227.4-228.0°C. Isolated yield: 84%.  $^1H$  NMR (500 MHz, DMSO- $d_6$ )  $\delta$  10.86 (s, 1H), 7.84 (d,  $J = 7.9$  Hz, 1H), 7.82 (s, 2H), 7.72 – 7.58 (m, 3H), 7.35 (t,  $J = 7.7$  Hz, 1H), 7.20 (t,  $J = 7.6$  Hz, 1H).  $^{13}C$  NMR (126 MHz, DMSO- $d_6$ )  $\delta$  161.5, 153.5 (dd,  $J = 244.7, 6.7$  Hz), 152.0, 148.1, 137.6 (t,  $J = 13.2$  Hz), 130.4, 130.4, 129.8, 127.9, 127.0 (t,  $J = 13.7$  Hz), 126.5, 123.3, 121.7, 120.2, 102.2 (dd,  $J = 20.0, 6.3$  Hz). HRMS (ESI): calculated for  $C_{19}H_{10}Cl_3F_2N_2OS$   $[M+H]^+$ : 456.95420; Found: 456.95393.

*N*-(4-(naphthalen-2-yloxy)phenyl)benzo[d]thiazol-2-amine (**6j**). White solid, m.p.

173.2-173.7°C. Isolated yield: 60%.  $^1H$  NMR (500 MHz, DMSO- $d_6$ )  $\delta$  10.52 (s, 1H), 7.96 (d,  $J = 9.4$  Hz, 1H), 7.90 (d,  $J = 8.1$  Hz, 1H), 7.85 (d,  $J = 8.8$  Hz, 2H), 7.81 (d,  $J = 4.6$  Hz, 1H), 7.79 (d,  $J = 4.6$  Hz, 1H), 7.58 (d,  $J = 8.0$  Hz, 1H), 7.47 (ddd,  $J = 8.2, 6.8, 1.4$  Hz, 1H), 7.42 (ddd,  $J = 8.0, 6.7, 1.3$  Hz, 1H), 7.36 – 7.28 (m, 3H), 7.20 – 7.12 (m, 3H).  $^{13}C$  NMR (126 MHz, DMSO- $d_6$ )  $\delta$  162.1, 156.1, 152.6, 151.0, 137.5, 134.4, 130.5, 130.5, 129.9, 128.1, 127.4, 127.1, 126.4, 125.0, 122.7, 121.5, 120.8, 119.9, 119.7, 119.6, 112.5. HRMS (ESI): calculated for  $C_{23}H_{17}N_2OS$   $[M+H]^+$ : 369.10561; Found: 369.10552.

*N*<sub>1</sub>-(benzo[d]thiazol-2-yl)-*N*<sub>4</sub>-phenylbenzene-1,4-diamine (**6k**). Brown solid, m.p.

181.3-182.6°C. Isolated yield: 52%.  $^1H$  NMR (500 MHz, DMSO- $d_6$ )  $\delta$  10.27 (s, 1H), 8.04 (s, 1H), 7.76 (d,  $J = 7.8$  Hz, 1H), 7.65 (d,  $J = 8.4$  Hz, 2H), 7.54 (d,  $J = 7.9$  Hz, 1H), 7.36 – 7.25 (m, 1H), 7.20 (t,  $J = 7.8$  Hz, 2H), 7.11 (d,  $J = 8.3$  Hz, 3H), 7.01 (d,  $J = 8.0$  Hz, 2H), 6.76 (t,  $J = 7.3$  Hz, 1H).  $^{13}C$  NMR (126 MHz, DMSO- $d_6$ )  $\delta$  162.5, 152.8, 144.7, 138.5, 134.3, 130.4, 129.6, 126.2, 122.3, 121.4, 119.9, 119.3, 119.3, 119.0, 116.0. HRMS (ESI): calculated for  $C_{19}H_{16}N_3S$   $[M+H]^+$ : 318.10594; Found: 318.10591.

*N*-(benzo[d]thiazol-2-yl)-*N*-(4-phenoxyphenyl)benzo[d]thiazol-2-amine (**7a**). White

solid, m.p. 217.1-217.7°C. Isolated yield: 86%.  $^1H$  NMR (500 MHz,  $CDCl_3$ )  $\delta$  7.81 (d,  $J = 8.1$  Hz, 2H), 7.74 (d,  $J = 7.9$  Hz, 2H), 7.49 (d,  $J = 8.8$  Hz, 2H), 7.47 – 7.37 (m,



4H), 7.30 – 7.24 (m, 3H), 7.24 – 7.16 (m, 4H). <sup>13</sup>C NMR (126 MHz, CDCl<sub>3</sub>) δ 163.1, 158.8, 155.9, 150.1, 136.1, 132.5, 130.8, 130.0, 126.1, 124.4, 123.5, 121.2, 120.8, 120.1, 119.4. HRMS (APCI): calculated for C<sub>26</sub>H<sub>18</sub>N<sub>3</sub>OS<sub>2</sub> [M+H]<sup>+</sup>: 452.08858; Found: 452.08744.

*2-(4-(Bis(benzo[d]thiazol-2-yl)amino)phenoxy)benzonitrile (7b)*. White solid, m.p. 205.9-208.0°C. Isolated yield: 73%. <sup>1</sup>H NMR (500 MHz, CDCl<sub>3</sub>) δ 7.81 (d, *J* = 8.1 Hz, 2H), 7.75 (t, *J* = 7.6 Hz, 3H), 7.62 (t, *J* = 7.7 Hz, 1H), 7.59 (d, *J* = 8.5 Hz, 2H), 7.42 (t, *J* = 7.7 Hz, 2H), 7.32 (d, *J* = 8.7 Hz, 2H), 7.29 – 7.22 (m, 3H), 7.19 (d, *J* = 8.5 Hz, 1H). <sup>13</sup>C NMR (126 MHz, CDCl<sub>3</sub>) δ 162.8, 158.5, 156.4, 150.1, 137.9, 134.4, 134.1, 132.5, 131.3, 126.2, 124.0, 123.6, 121.3, 121.0, 120.8, 118.5, 115.6, 104.9. HRMS (ESI): calculated for C<sub>27</sub>H<sub>17</sub>N<sub>4</sub>OS<sub>2</sub> [M+H]<sup>+</sup>: 477.08383; Found: 477.08349.

*N-(benzo[d]thiazol-2-yl)-N-(4-(2,4-dichlorophenoxy)phenyl)benzo[d]thiazol-2-amine (7c)*. White solid, m.p. 174.4-175.8°C. Isolated yield: 75%. <sup>1</sup>H NMR (500 MHz, CDCl<sub>3</sub>) δ 7.80 (d, *J* = 8.1 Hz, 2H), 7.73 (d, *J* = 7.9 Hz, 2H), 7.53 (d, *J* = 2.5 Hz, 1H), 7.50 (d, *J* = 8.8 Hz, 2H), 7.40 (t, *J* = 7.7 Hz, 2H), 7.30 (dd, *J* = 8.7, 2.5 Hz, 1H), 7.25 (t, *J* = 7.6 Hz, 2H), 7.20 – 7.11 (m, 3H). <sup>13</sup>C NMR (126 MHz, CDCl<sub>3</sub>) δ 162.9, 157.7, 150.3, 150.1, 136.7, 132.4, 131.0, 130.7, 130.3, 128.4, 127.4, 126.1, 123.5, 122.7, 121.2, 120.8, 118.8. HRMS (APCI): calculated for C<sub>26</sub>H<sub>16</sub>Cl<sub>2</sub>N<sub>3</sub>OS<sub>2</sub> [M+H]<sup>+</sup>: 520.01064; Found: 520.00994.

*N-(benzo[d]thiazol-2-yl)-N-(3-chloro-4-(2,4-dichlorophenoxy)phenyl)benzo[d]thiazol-2-amine (7d)*. White solid, m.p. 215.3-216.4°C. Isolated yield: 51%. <sup>1</sup>H NMR (500 MHz, DMSO-*d*<sub>6</sub>) δ 8.19 (d, *J* = 2.6 Hz, 1H), 8.00 (d, *J* = 7.4 Hz, 2H), 7.90 (d, *J* = 2.6 Hz, 1H), 7.76 (d, *J* = 7.7 Hz, 2H), 7.72 (dd, *J* = 8.7, 2.5 Hz, 1H), 7.58 (dd, *J* = 8.8, 2.5 Hz, 1H), 7.46 (ddd, *J* = 8.3, 7.2, 1.3 Hz, 2H), 7.35 (d, *J* = 8.8 Hz, 1H), 7.32 (ddd, *J* = 8.2, 7.3, 1.2 Hz, 2H), 7.18 (d, *J* = 8.8 Hz, 1H). <sup>13</sup>C NMR (126 MHz, DMSO-*d*<sub>6</sub>) δ 162.9, 153.2, 149.9, 137.7, 132.7, 132.4, 131.0, 130.9, 130.3, 129.7, 126.9, 126.4, 125.9, 124.3, 124.2, 123.2, 122.1, 121.1, 119.6. HRMS (APCI): calculated for C<sub>26</sub>H<sub>15</sub>Cl<sub>3</sub>N<sub>3</sub>OS<sub>2</sub> [M+H]<sup>+</sup>: 553.97166; Found: 553.97070.

*N-(benzo[d]thiazol-2-yl)-N-(3,5-dichloro-4-(2,4-dichlorophenoxy)phenyl)benzo[d]thiazol-2-amine (7e)*. White solid, m.p. 216.0-216.4°C. Isolated yield: 82%. <sup>1</sup>H NMR

(500 MHz, CDCl<sub>3</sub>) δ 7.84 (d, *J* = 8.1 Hz, 2H), 7.77 (dd, *J* = 8.0, 1.2 Hz, 2H), 7.66 (s, 2H), 7.53 (d, *J* = 2.5 Hz, 1H), 7.46 (ddd, *J* = 8.2, 7.3, 1.3 Hz, 2H), 7.35 – 7.27 (m, 2H), 7.21 (dd, *J* = 8.8, 2.5 Hz, 1H), 6.63 (d, *J* = 8.7 Hz, 1H). <sup>13</sup>C NMR (126 MHz, CDCl<sub>3</sub>) δ 161.8, 150.7, 149.8, 148.1, 139.2, 132.3, 130.9, 130.7, 130.7, 128.4, 127.8, 126.5, 124.0, 123.8, 121.4, 120.9, 115.4. HRMS (APCI): calculated for C<sub>26</sub>H<sub>14</sub>Cl<sub>4</sub>N<sub>3</sub>OS<sub>2</sub> [M+H]<sup>+</sup>: 587.93269; Found: 587.93182.

*N*-(benzo[d]thiazol-2-yl)-*N*-(3-chloro-4-(2,4,6-trichlorophenoxy)phenyl)benzo[d]thiazol-2-amine (**7f**). White solid, m.p. 256.2-257.7°C. Isolated yield: 81%. <sup>1</sup>H NMR (500 MHz, CDCl<sub>3</sub>) δ 7.81 (d, *J* = 8.1 Hz, 2H), 7.74 (d, *J* = 7.8 Hz, 2H), 7.70 (d, *J* = 2.5 Hz, 1H), 7.48 (s, 2H), 7.46 – 7.38 (m, 2H), 7.33 (dd, *J* = 8.7, 2.6 Hz, 1H), 7.31 – 7.25 (m, 2H), 6.69 (d, *J* = 8.7 Hz, 1H). <sup>13</sup>C NMR (126 MHz, CDCl<sub>3</sub>) δ 162.6, 152.9, 150.0, 145.9, 136.6, 132.5, 132.1, 132.0, 130.3, 129.3, 128.9, 126.3, 124.4, 123.7, 121.3, 120.8, 115.6. HRMS (APCI): calculated for C<sub>26</sub>H<sub>14</sub>Cl<sub>4</sub>N<sub>3</sub>OS<sub>2</sub> [M+H]<sup>+</sup>: 587.93269; Found: 587.93194.

*N*-(benzo[d]thiazol-2-yl)-*N*-(3-fluoro-4-(2,4,6-trichlorophenoxy)phenyl)benzo[d]thiazol-2-amine (**7g**). White solid, m.p. 198.1-199.0°C. Isolated yield: 80%. <sup>1</sup>H NMR (500 MHz, CDCl<sub>3</sub>) δ 7.81 (d, *J* = 8.1 Hz, 2H), 7.74 (dd, *J* = 8.0, 1.2 Hz, 2H), 7.47 (s, 2H), 7.46 – 7.38 (m, 3H), 7.31 – 7.25 (m, 2H), 7.22 (dt, *J* = 8.8, 2.2 Hz, 1H), 6.80 (t, *J* = 8.7 Hz, 1H). <sup>13</sup>C NMR (126 MHz, CDCl<sub>3</sub>) δ 162.5, 152.3 (d, *J* = 252.4 Hz), 150.0, 145.8, 145.4 (d, *J* = 10.9 Hz), 136.3 (d, *J* = 8.3 Hz), 132.5, 131.9, 130.2, 129.3, 126.3, 125.7 (d, *J* = 3.6 Hz), 123.7, 121.3, 120.8, 118.8 (d, *J* = 19.2 Hz), 116.9. HRMS (APCI): calculated for C<sub>26</sub>H<sub>13</sub>Cl<sub>3</sub>FN<sub>3</sub>OS<sub>2</sub> [M+H]<sup>+</sup>: 571.96224; Found: 571.96136.

*N*-(benzo[d]thiazol-2-yl)-*N*-(3,5-dichloro-4-(2,4,6-trichlorophenoxy)phenyl)benzo[d]thiazol-2-amine (**7h**). White solid, m.p. 227.8-228.7°C. Isolated yield: 78%. <sup>1</sup>H NMR (500 MHz, CDCl<sub>3</sub>) δ 7.82 (d, *J* = 8.1 Hz, 2H), 7.76 (d, *J* = 7.9 Hz, 2H), 7.55 (s, 2H), 7.44 (t, *J* = 7.7 Hz, 2H), 7.38 (s, 2H), 7.29 (t, *J* = 7.6 Hz, 2H). <sup>13</sup>C NMR (126 MHz, CDCl<sub>3</sub>) δ 161.9, 149.9, 149.4, 147.2, 137.5, 132.4, 130.6, 129.9, 129.2, 127.9, 127.3, 126.4, 123.9, 121.4, 120.9. HRMS (APCI): calculated for C<sub>26</sub>H<sub>13</sub>Cl<sub>5</sub>N<sub>3</sub>OS<sub>2</sub> [M+H]<sup>+</sup>: 621.89372; Found: 621.89258.

*N*-(benzo[d]thiazol-2-yl)-*N*-(3,5-difluoro-4-(2,4,6-trichlorophenoxy)phenyl)benzo[d]

*thiazol-2-amine (7i)*. Yellow solid, m.p. 221.0-224.1°C. Isolated yield: 82%. <sup>1</sup>H NMR (500 MHz, DMSO-*d*<sub>6</sub>) δ 8.02 (dd, *J* = 8.0, 1.2 Hz, 2H), 7.96 (d, *J* = 9.2 Hz, 2H), 7.92 (s, 2H), 7.78 (d, *J* = 8.0 Hz, 2H), 7.47 (t, *J* = 7.4 Hz, 2H), 7.33 (t, *J* = 7.5 Hz, 2H). <sup>13</sup>C NMR (126 MHz, CDCl<sub>3</sub>) δ 161.9, 154.3 (dd, *J* = 252.9, 5.8 Hz), 149.9, 147.8, 136.1 (t, *J* = 11.4 Hz), 134.6 (t, *J* = 12.6 Hz), 132.4, 130.9, 129.0, 128.4, 126.4, 123.9, 121.4, 120.9, 114.6 (dd, *J* = 18.9, 5.0 Hz). HRMS (APCI): calculated for C<sub>26</sub>H<sub>12</sub>Cl<sub>3</sub>F<sub>2</sub>N<sub>3</sub>OS<sub>2</sub> [M+H]<sup>+</sup>: 589.95282; Found: 589.95178.

*N*-(benzo[*d*]thiazol-2-yl)-*N*-(4-(naphthalen-2-yloxy)phenyl)benzo[*d*]thiazol-2-amine (7j). White solid, m.p. 218.7-219.4°C. Isolated yield: 46%. <sup>1</sup>H NMR (500 MHz, DMSO-*d*<sub>6</sub>) δ 8.09 (d, *J* = 9.0 Hz, 1H), 7.99 (d, *J* = 7.9 Hz, 3H), 7.96 (d, *J* = 8.1 Hz, 1H), 7.79 – 7.69 (m, 5H), 7.57 (ddd, *J* = 8.2, 6.8, 1.4 Hz, 1H), 7.52 (ddd, *J* = 8.0, 6.8, 1.4 Hz, 1H), 7.48 – 7.42 (m, 3H), 7.35 – 7.27 (m, 4H). <sup>13</sup>C NMR (126 MHz, DMSO-*d*<sub>6</sub>) δ 163.2, 158.8, 153.5, 150.0, 136.7, 134.5, 132.4, 131.9, 131.0, 130.9, 128.3, 127.8, 127.3, 126.9, 125.9, 124.1, 122.1, 121.0, 120.9, 119.7, 116.4. HRMS (APCI): calculated for C<sub>30</sub>H<sub>20</sub>N<sub>3</sub>OS<sub>2</sub> [M+H]<sup>+</sup>: 502.10423; Found: 502.10339.

*N*<sub>1</sub>,*N*<sub>1</sub>-bis(benzo[*d*]thiazol-2-yl)-*N*<sub>4</sub>-phenylbenzene-1,4-diamine (7k). White solid, m.p. 202.3-203.4 °C. Isolated yield: 26%. <sup>1</sup>H NMR (500 MHz, CDCl<sub>3</sub>) δ 7.82 (d, *J* = 8.1 Hz, 2H), 7.73 (d, *J* = 7.8 Hz, 2H), 7.44 – 7.37 (m, 4H), 7.34 (t, *J* = 7.8 Hz, 2H), 7.28 – 7.26 (m, 2H), 7.24 – 7.20 (m, 4H), 7.04 (t, *J* = 7.3 Hz, 1H), 6.13 (s, 1H). <sup>13</sup>C NMR (126 MHz, CDCl<sub>3</sub>) δ 163.5, 150.2, 145.1, 141.6, 133.5, 132.6, 130.1, 129.5, 126.1, 123.4, 122.2, 121.1, 120.8, 119.4, 117.4. HRMS (APCI): calculated for C<sub>26</sub>H<sub>19</sub>N<sub>4</sub>S<sub>2</sub> [M+H]<sup>+</sup>: 451.10456; Found: 451.10373.

*N,N*-diphenylbenzo[*d*]thiazol-2-amine (9). Yellow solid, m.p. 120.1-120.9 °C. Isolated yields: 80% for Condition A and 75% for Condition B. <sup>1</sup>H NMR (500 MHz, CDCl<sub>3</sub>) δ 7.66 (dd, *J* = 8.2, 1.1 Hz, 1H), 7.54 (dd, *J* = 7.9, 1.1 Hz, 1H), 7.48 – 7.37 (m, 8H), 7.34 – 7.26 (m, 3H), 7.13 (td, *J* = 7.6, 1.2 Hz, 1H). <sup>13</sup>C NMR (126 MHz, CDCl<sub>3</sub>) δ 167.2, 152.2, 144.7, 131.9, 129.6, 126.5, 126.4, 125.9, 122.5, 120.4, 120.3. HRMS (APCI): calculated for C<sub>19</sub>H<sub>15</sub>N<sub>2</sub>S [M+H]<sup>+</sup>: 303.09505; Found: 303.09460.

### 3. Original NMR and HRMS spectra for 3, 4, 6, 7 and 9

#### ➤ <sup>1</sup>H NMR spectrum for 3a

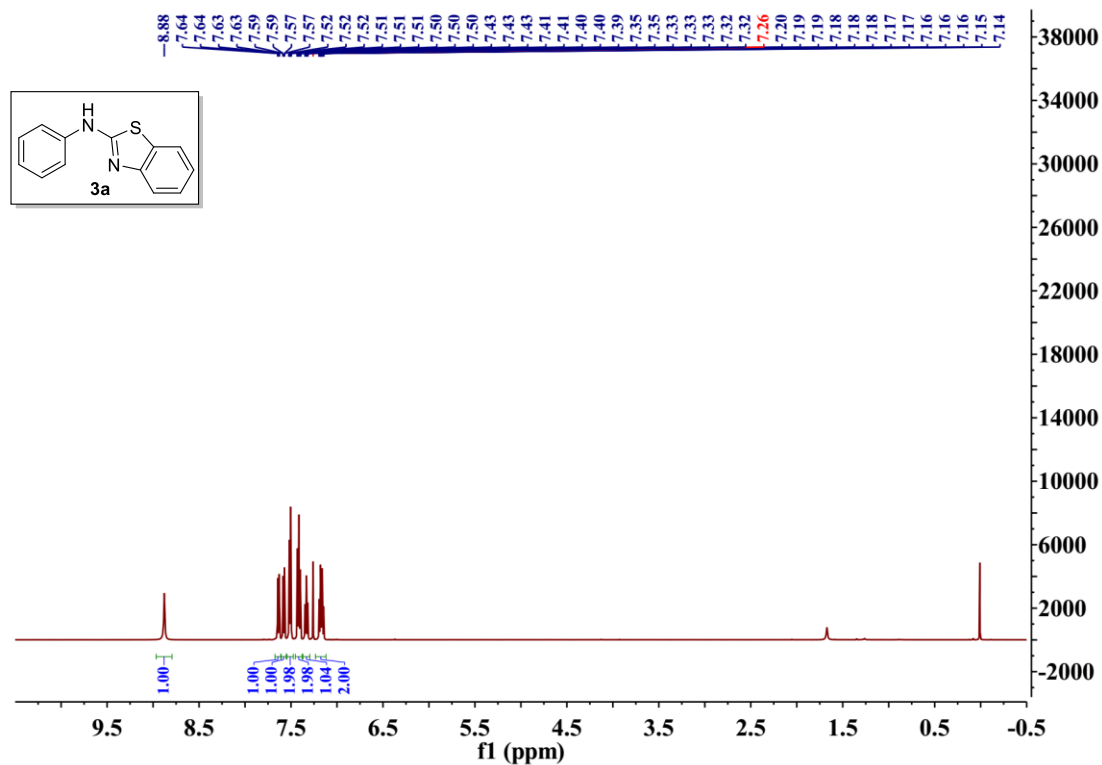

#### ➤ <sup>13</sup>C NMR spectrum for 3a

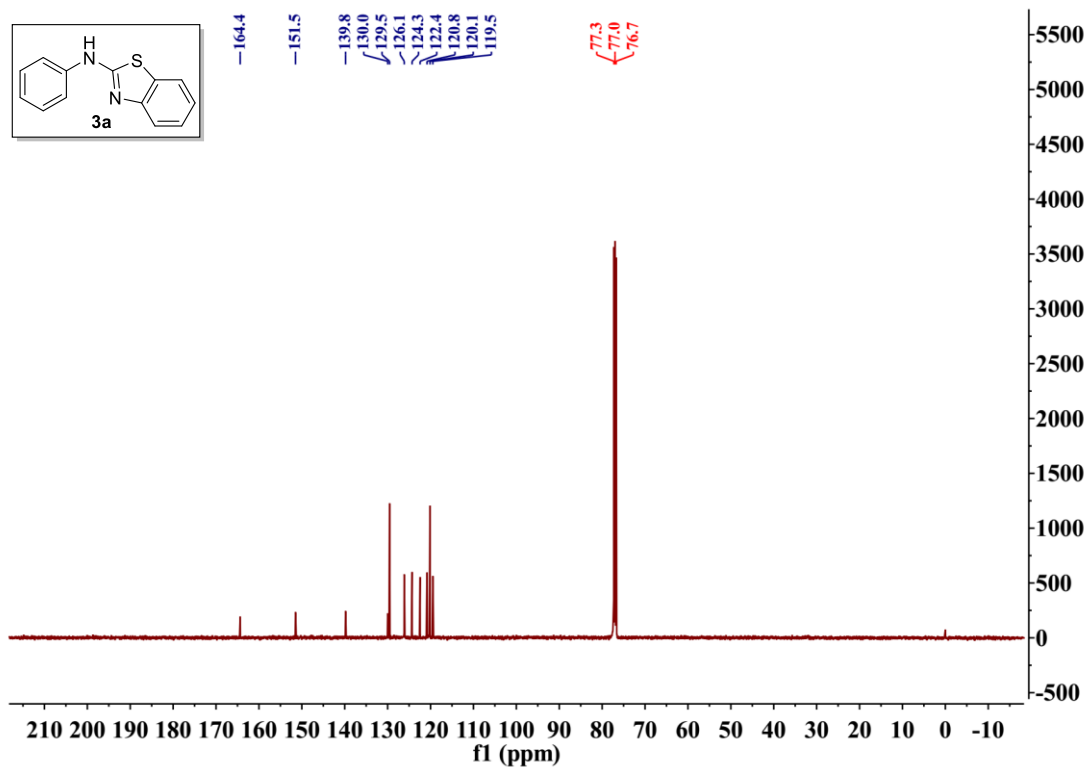

➤ HRMS spectrum for **3a**

Generic Display Report (all)

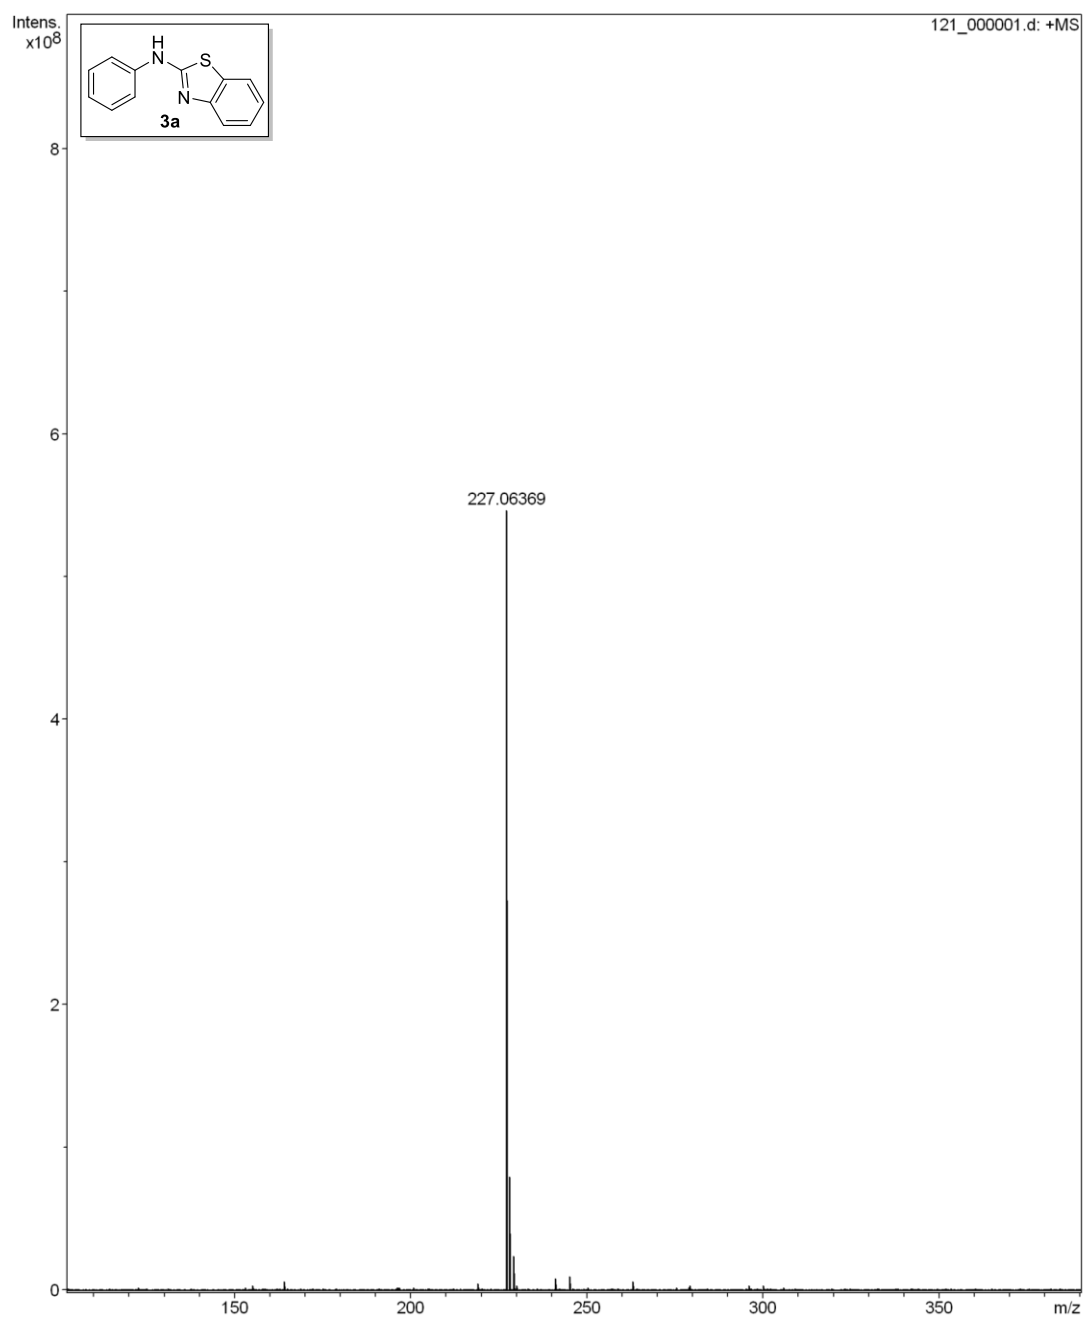

➤ <sup>1</sup>H NMR spectrum for **3b**

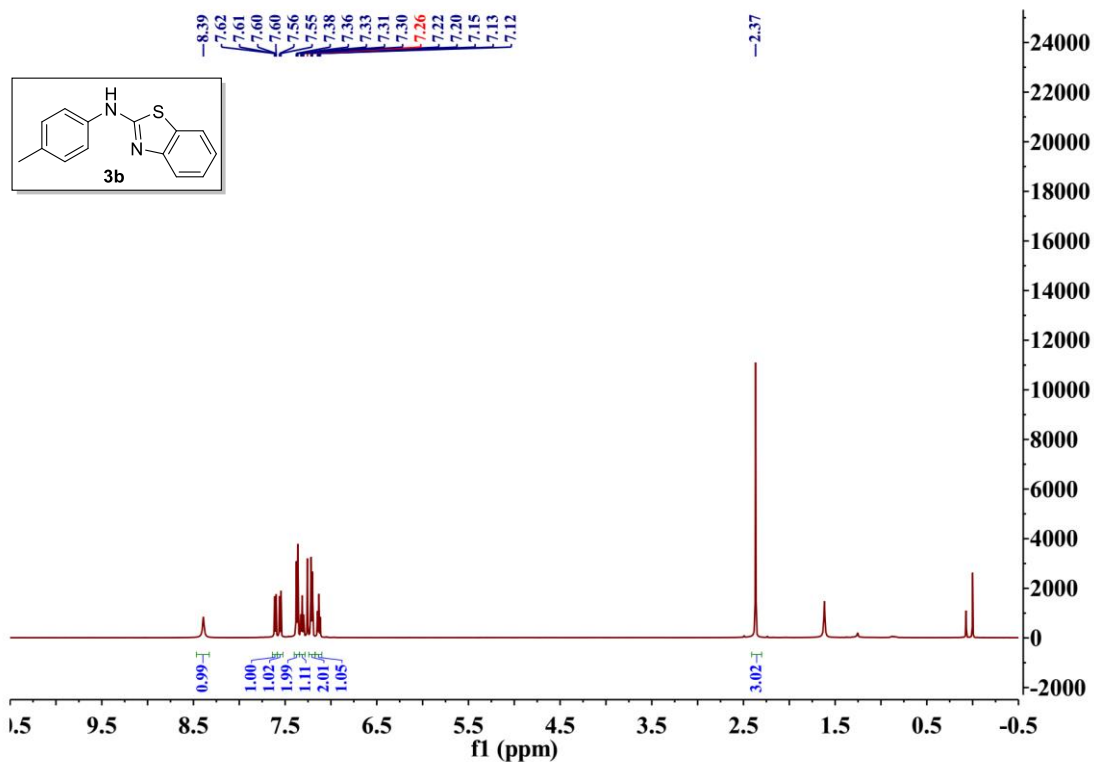

➤ <sup>13</sup>C NMR spectrum for **3b**

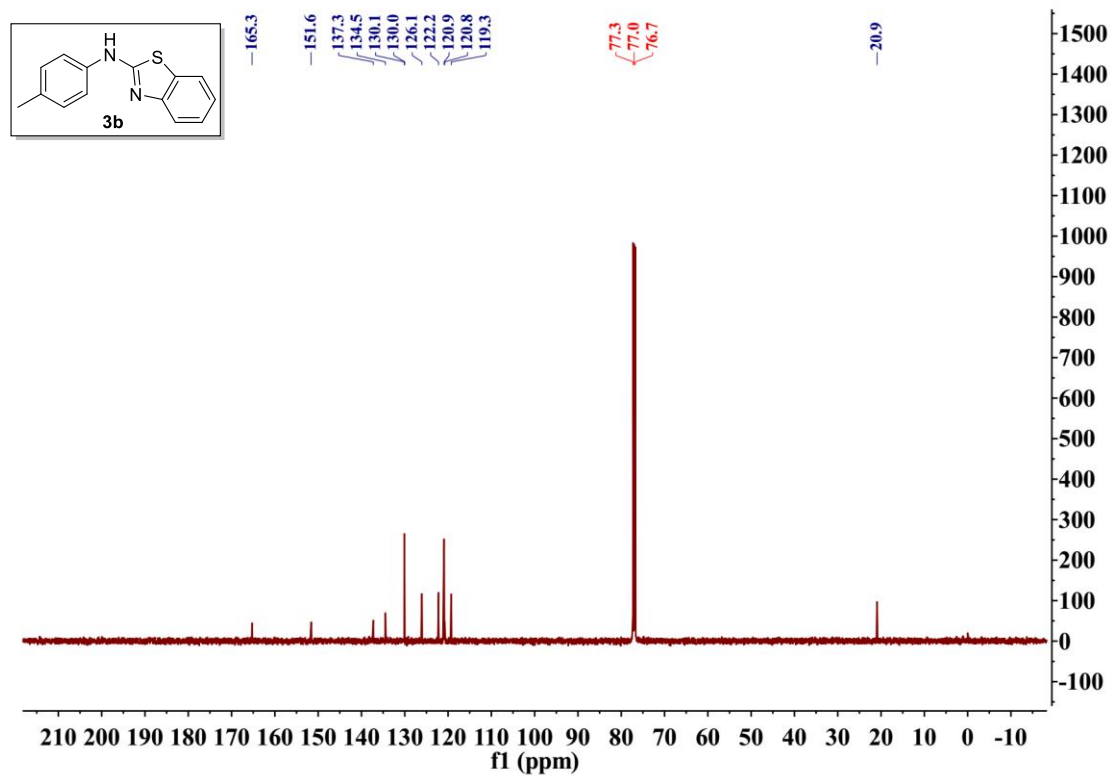

➤ HRMS spectrum for **3b**

Generic Display Report (all)

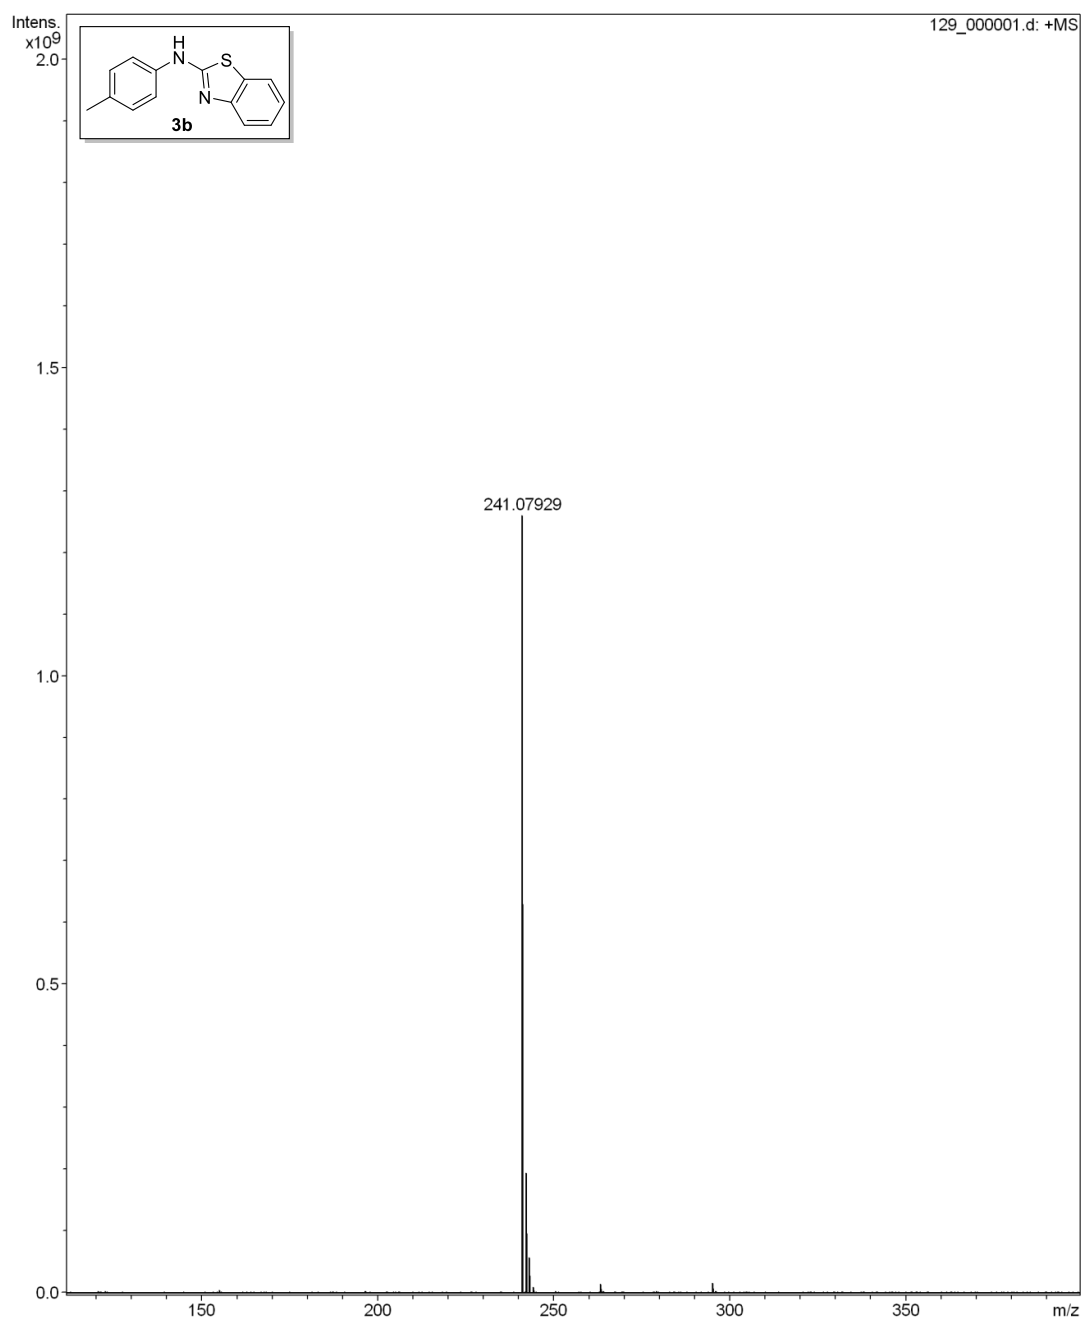

➤ <sup>1</sup>H NMR spectrum for **3c**

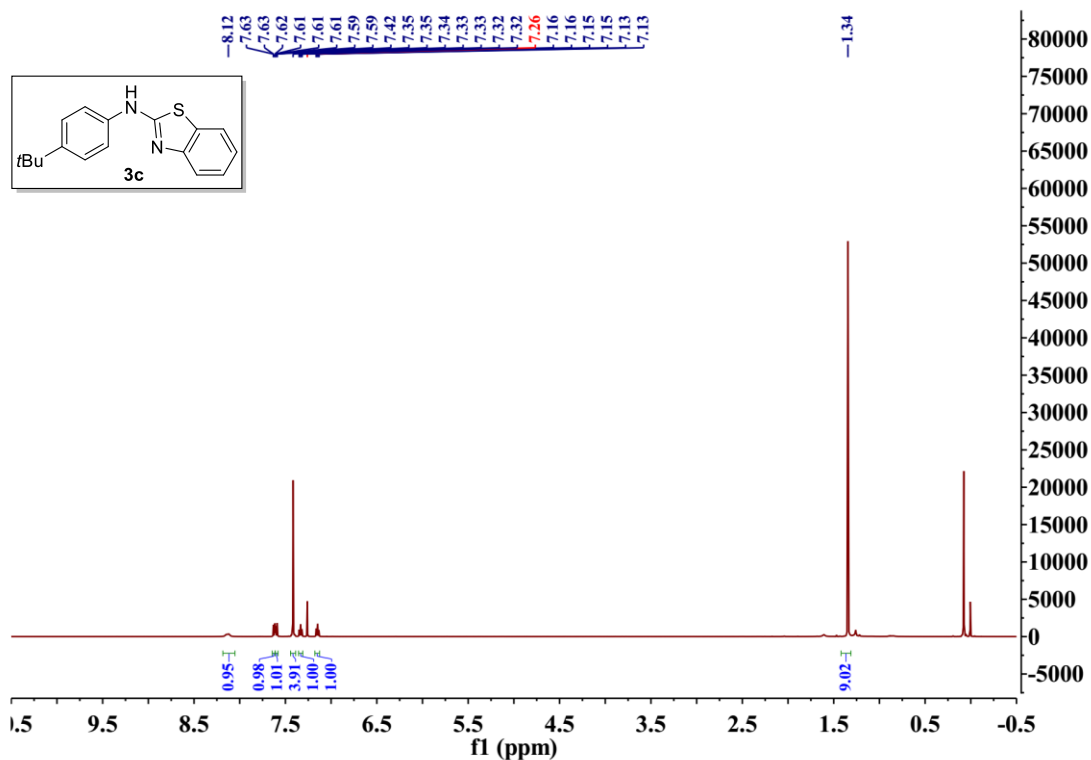

➤ <sup>13</sup>C NMR spectrum for **3c**

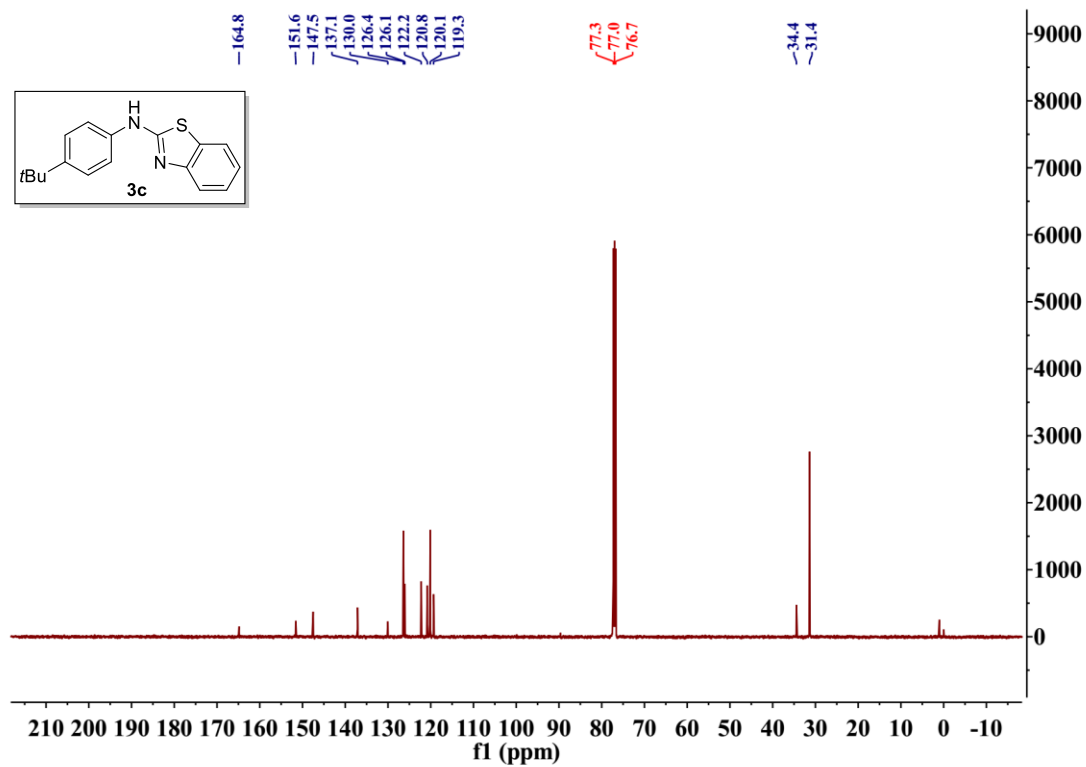



➤ HRMS spectrum for **3c**

Generic Display Report (all)

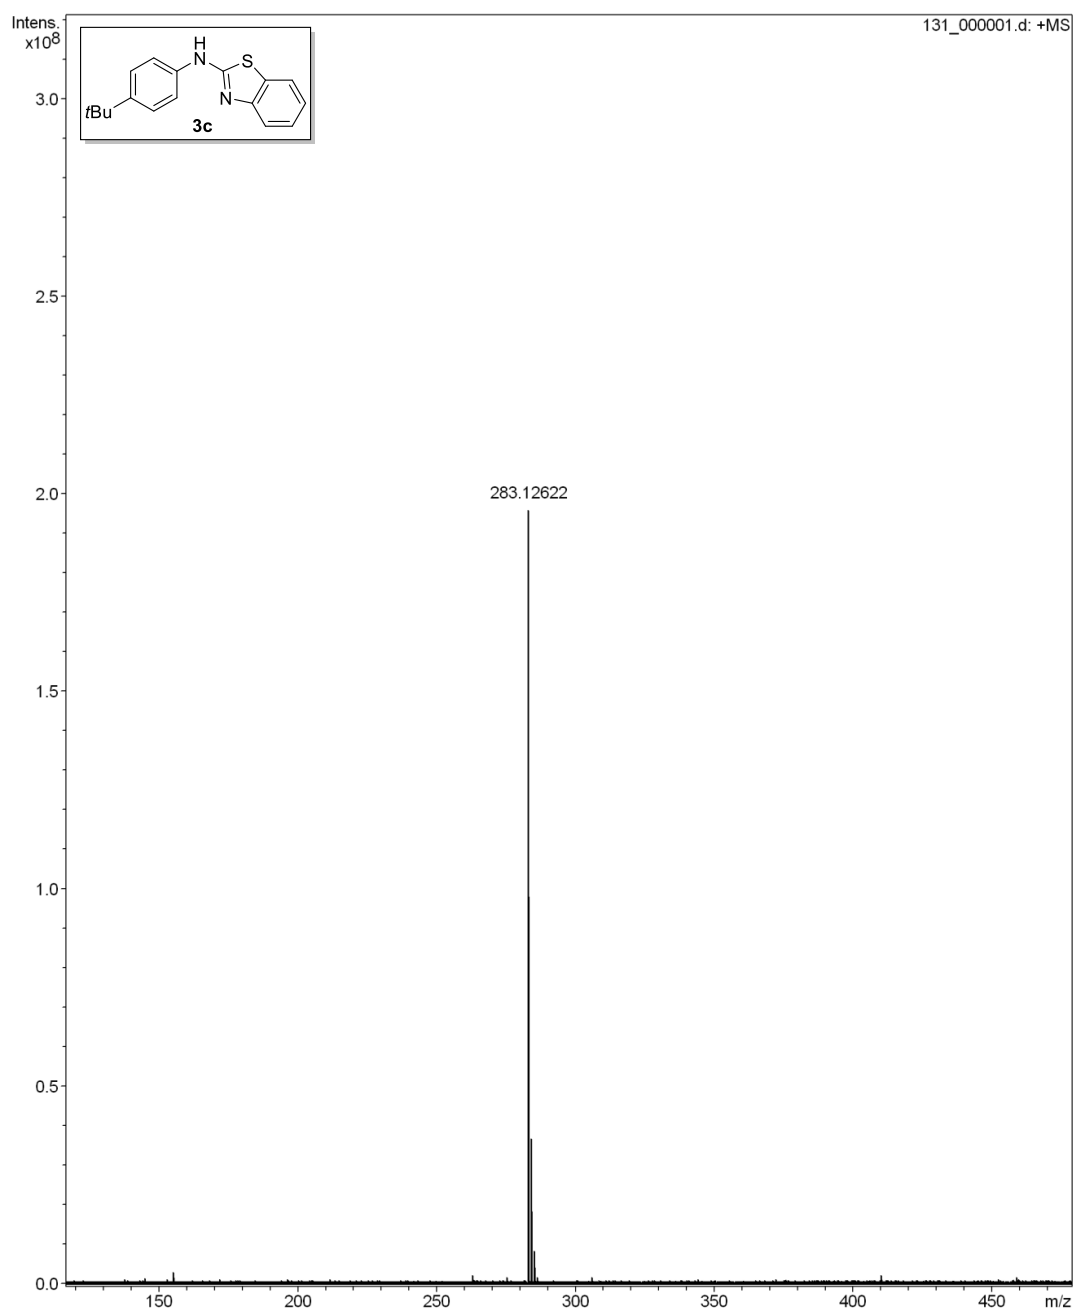

➤ <sup>1</sup>H NMR spectrum for **3d**

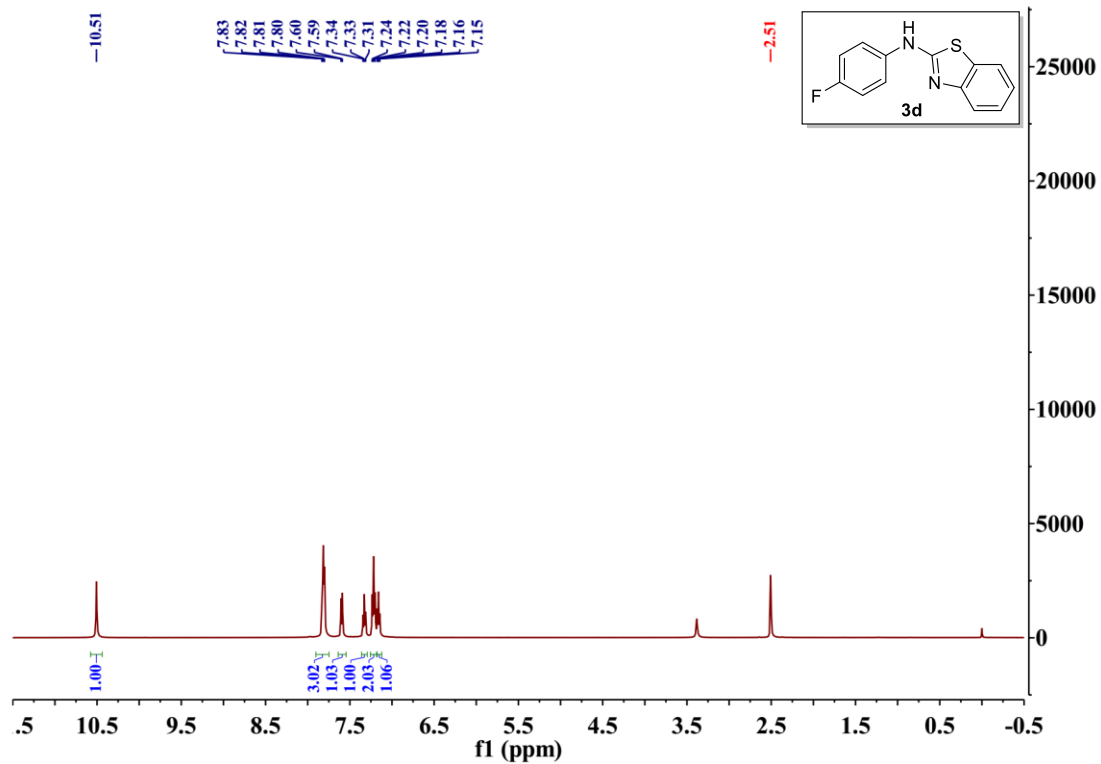

➤ <sup>13</sup>C NMR spectrum for **3d**

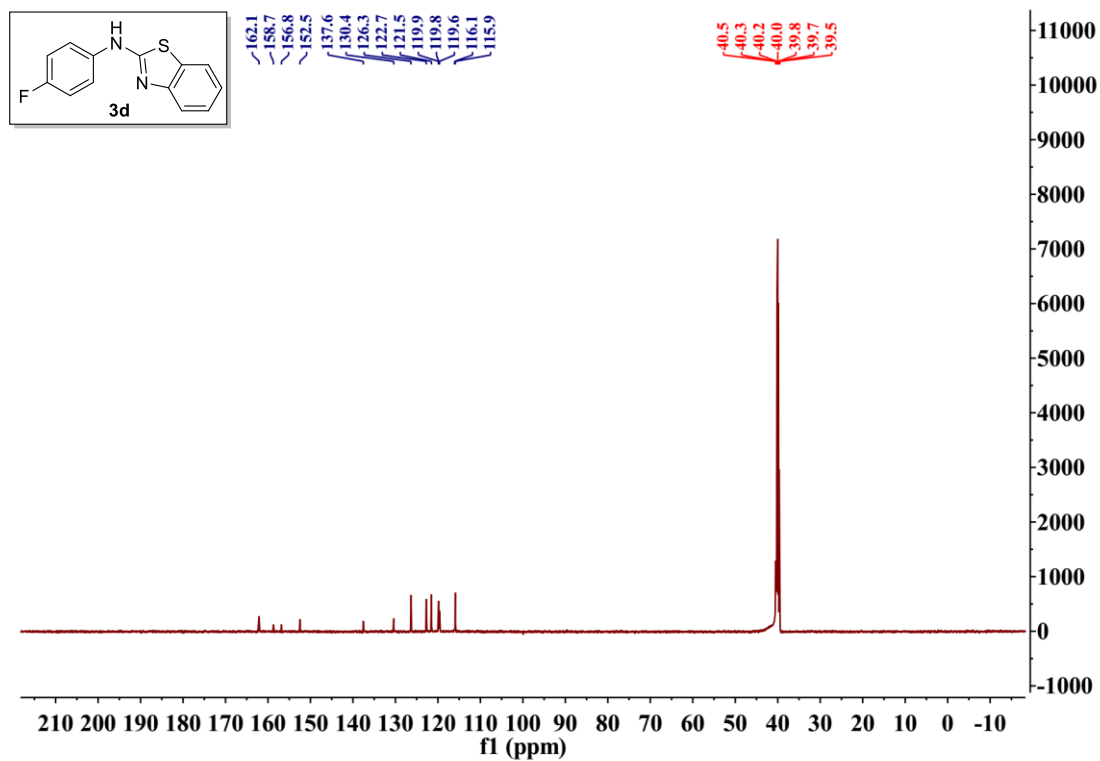

➤ HRMS spectrum for **3d**

Generic Display Report (all)

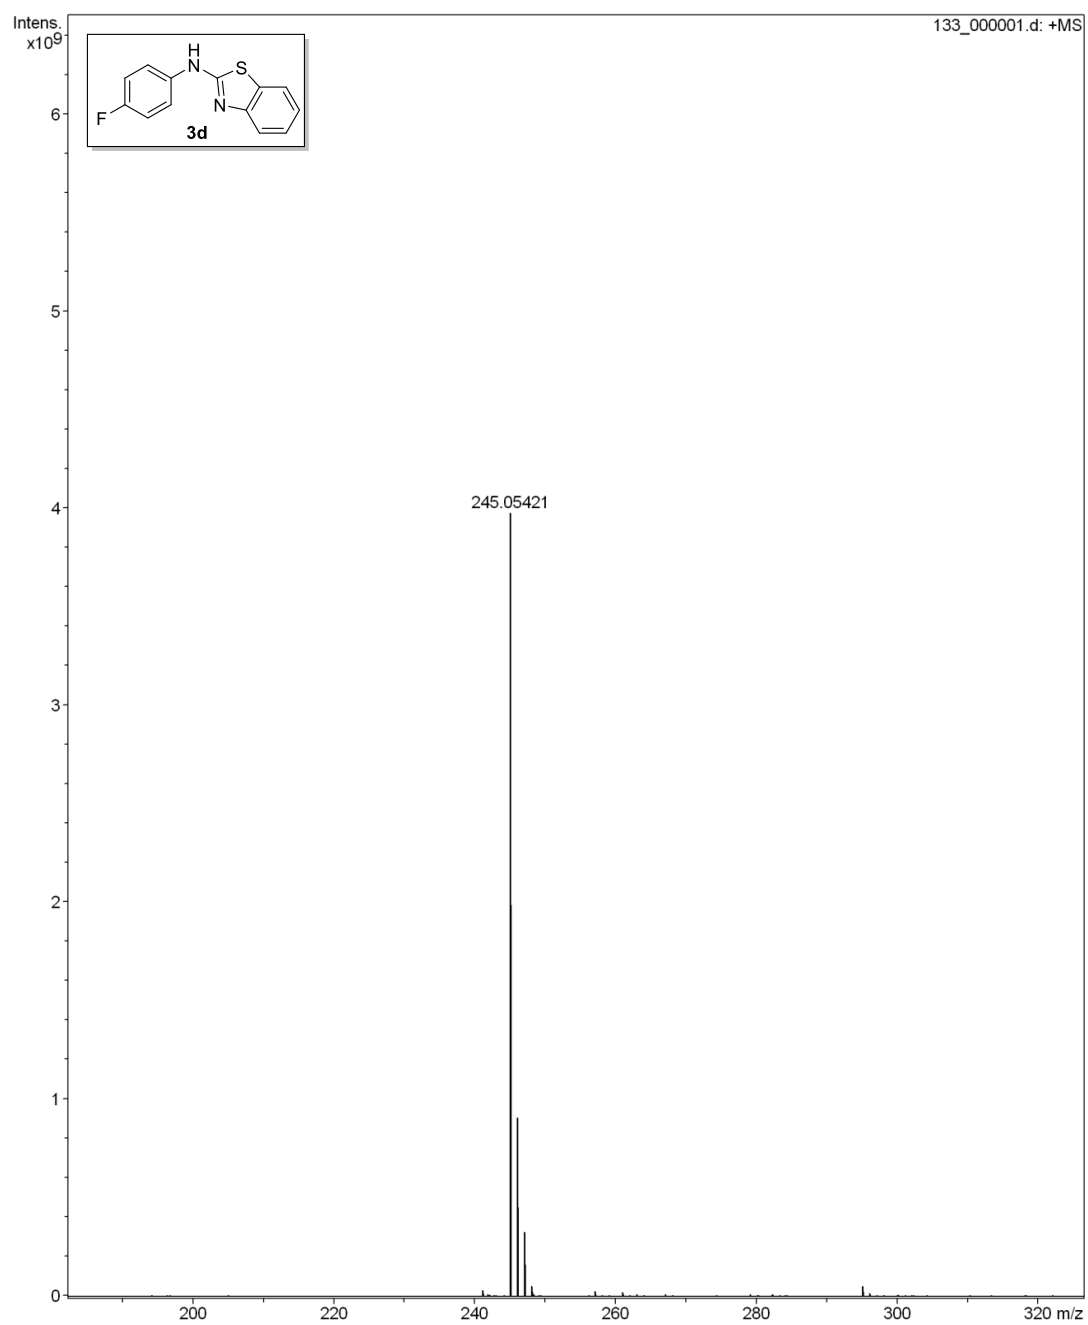

➤ <sup>1</sup>H NMR spectrum for **3e**

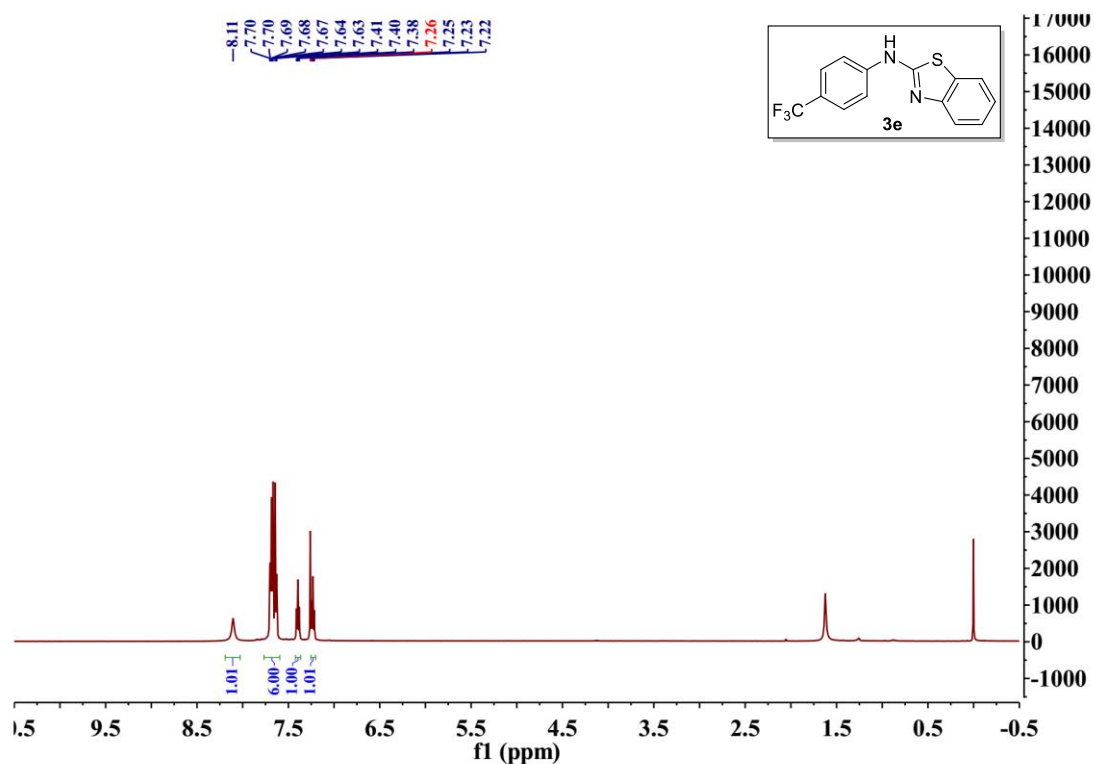

➤ <sup>13</sup>C NMR spectrum for **3e**

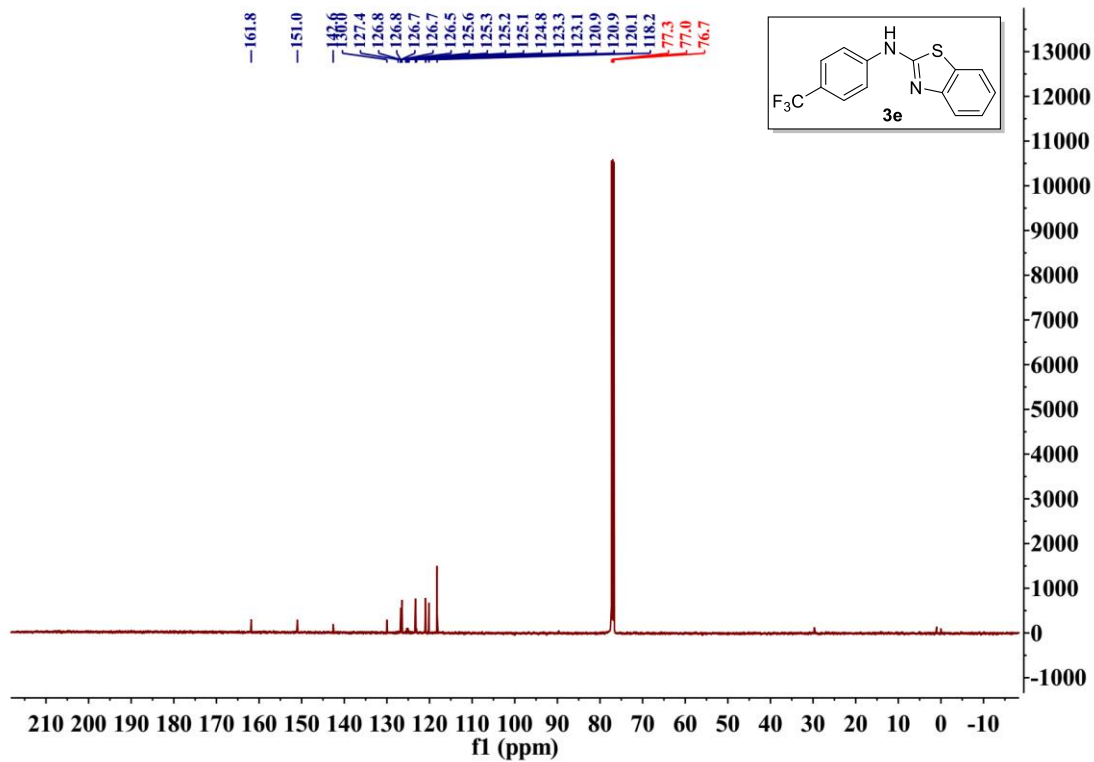

➤ HRMS spectrum for **3e**

Generic Display Report (all)

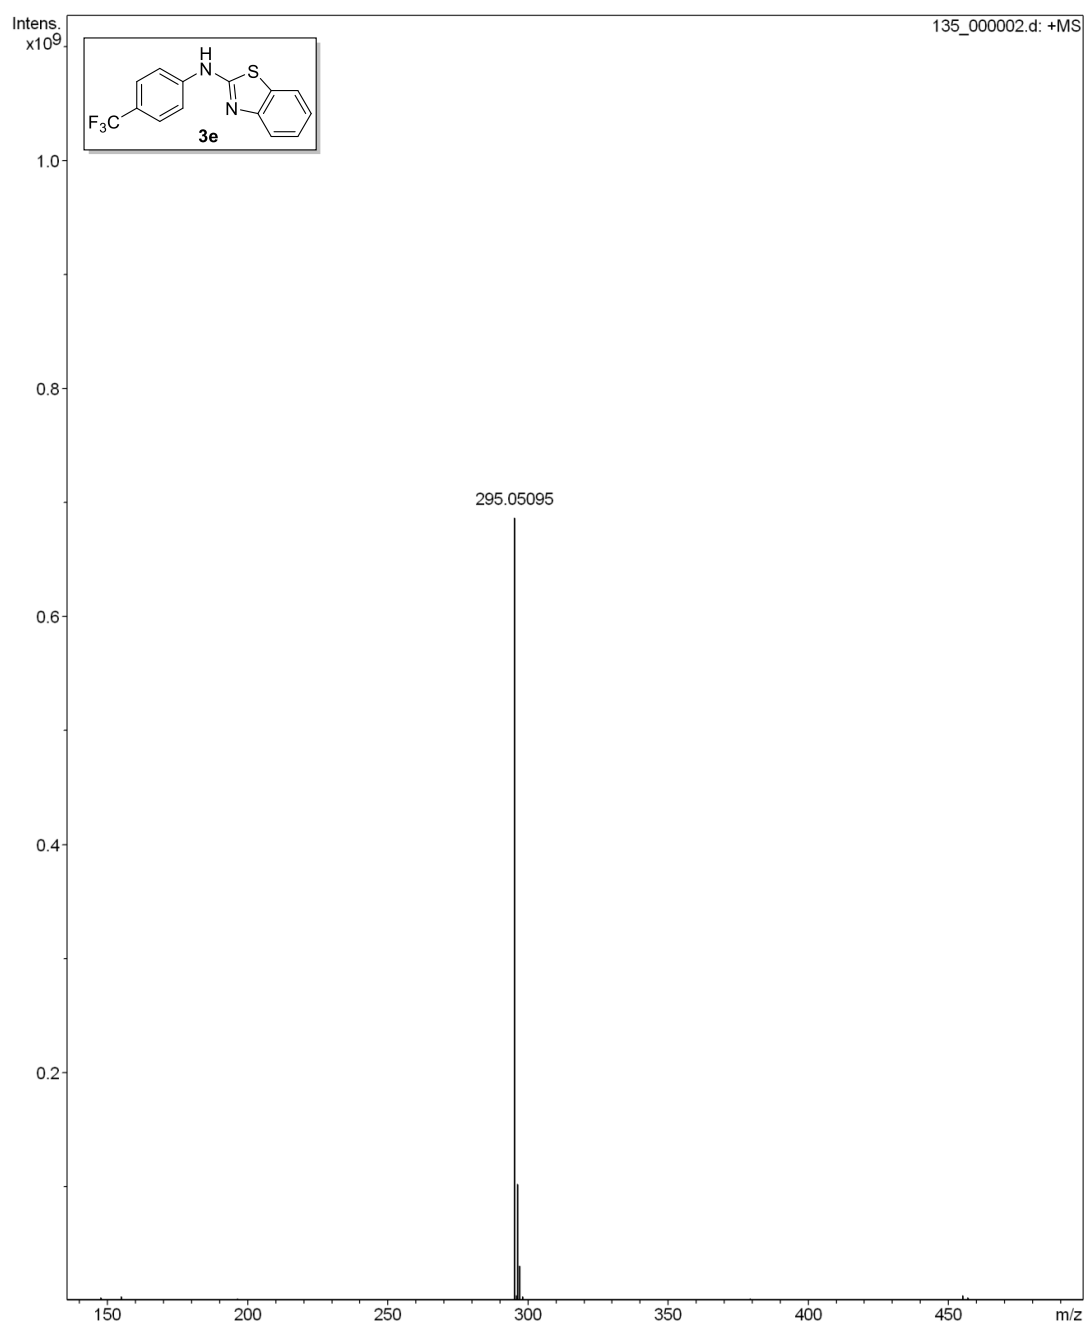

➤ <sup>1</sup>H NMR spectrum for **3f**

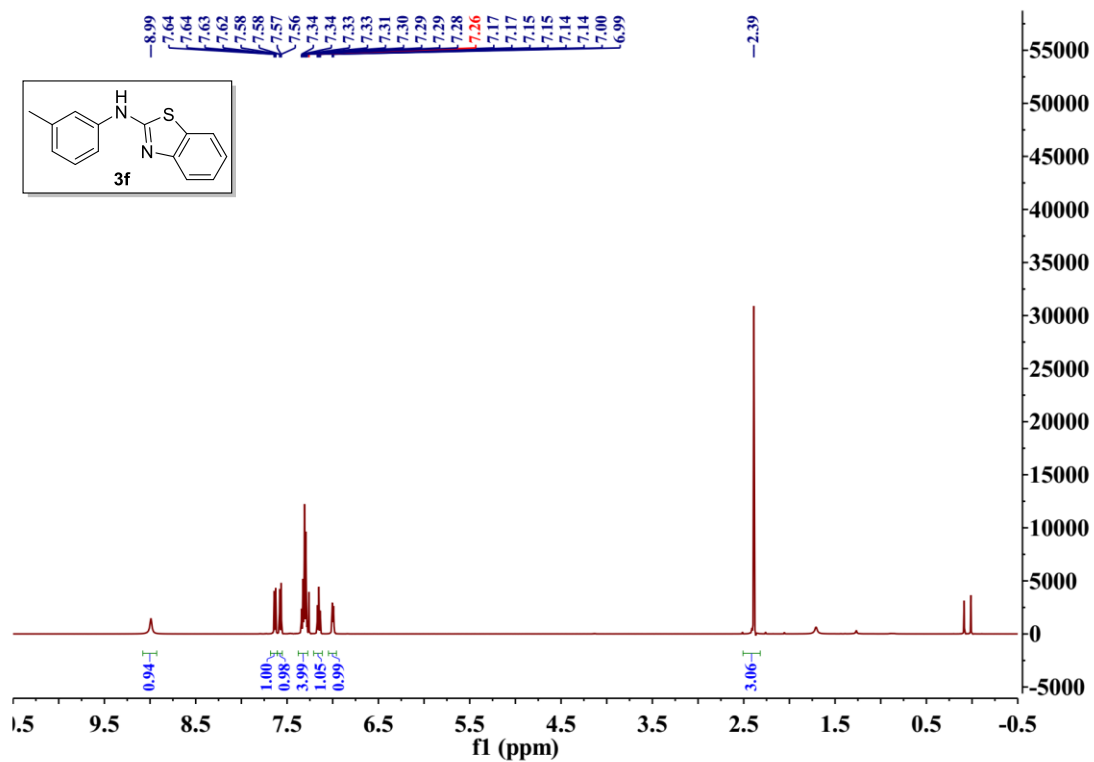

➤ <sup>13</sup>C NMR spectrum for **3f**

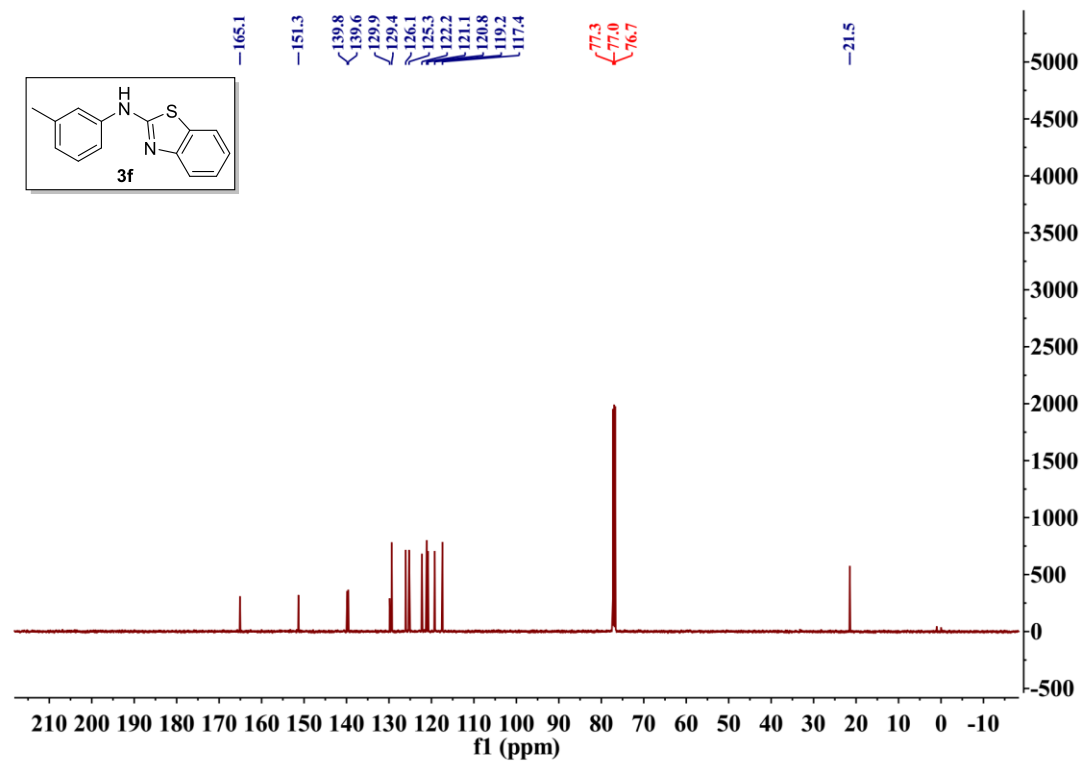

➤ HRMS spectrum for **3f**

Generic Display Report (all)

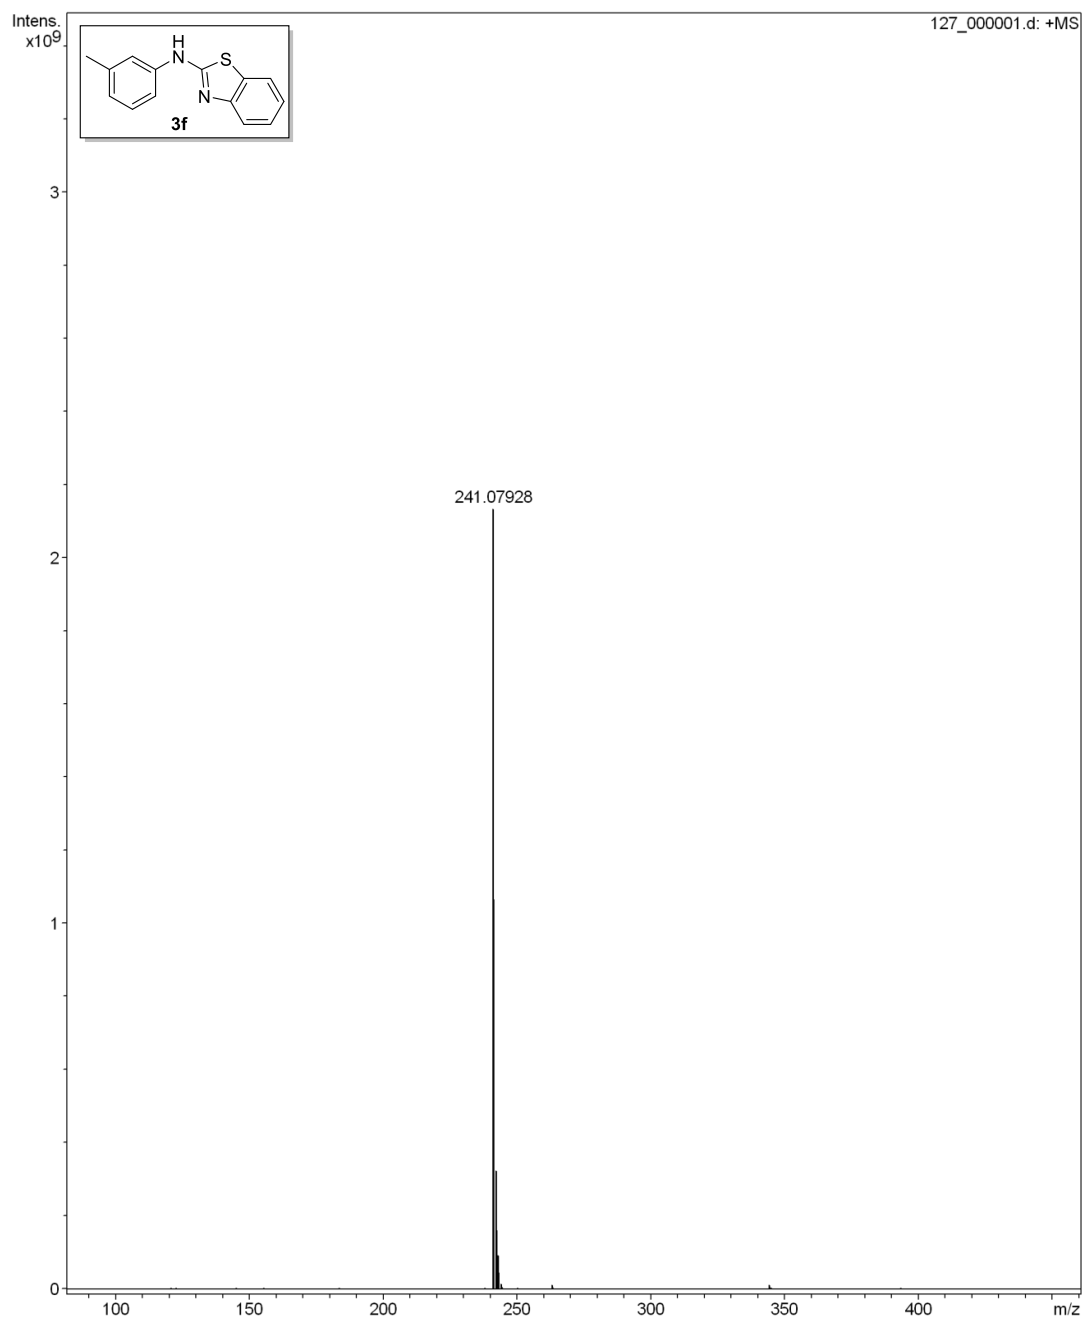

➤ <sup>1</sup>H NMR spectrum for **3g**

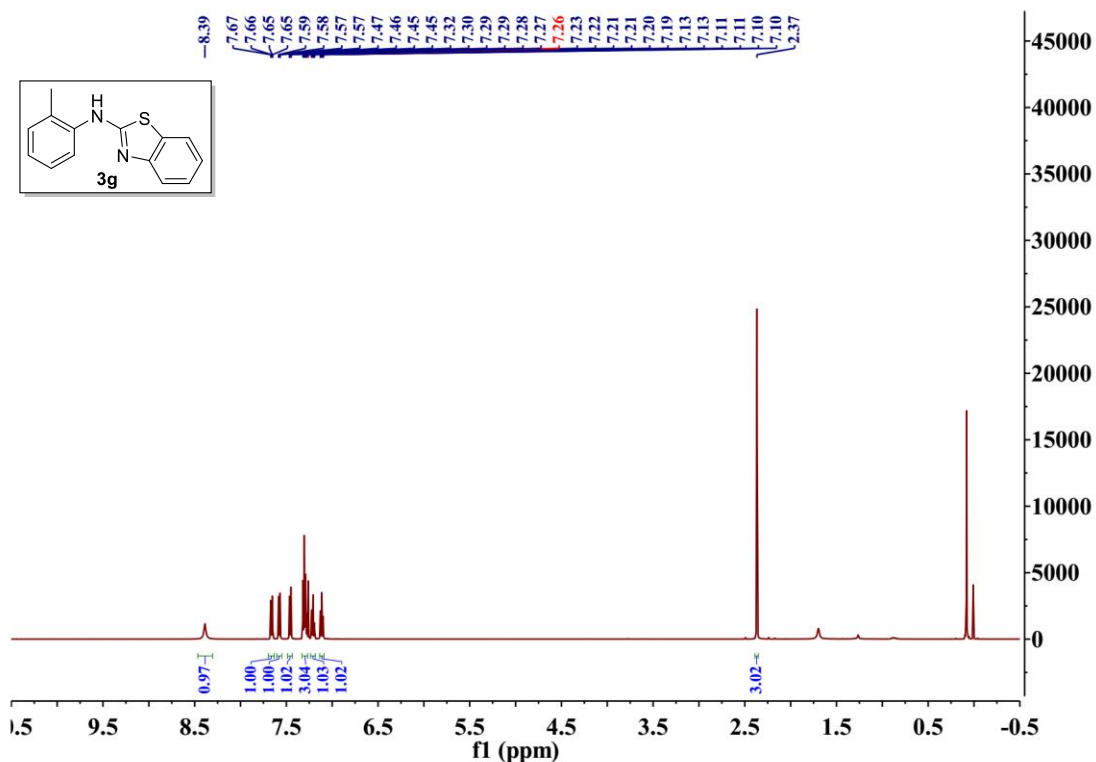

➤ <sup>13</sup>C NMR spectrum for **3g**

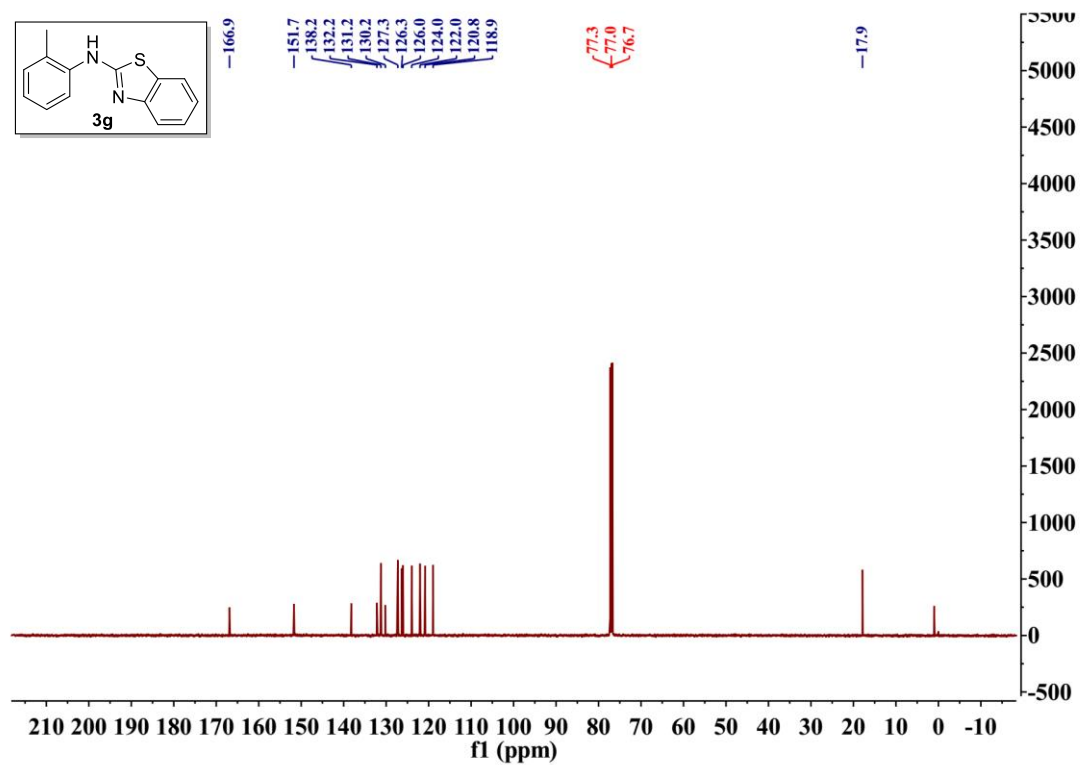



➤ HRMS spectrum for **3g**

Generic Display Report (all)

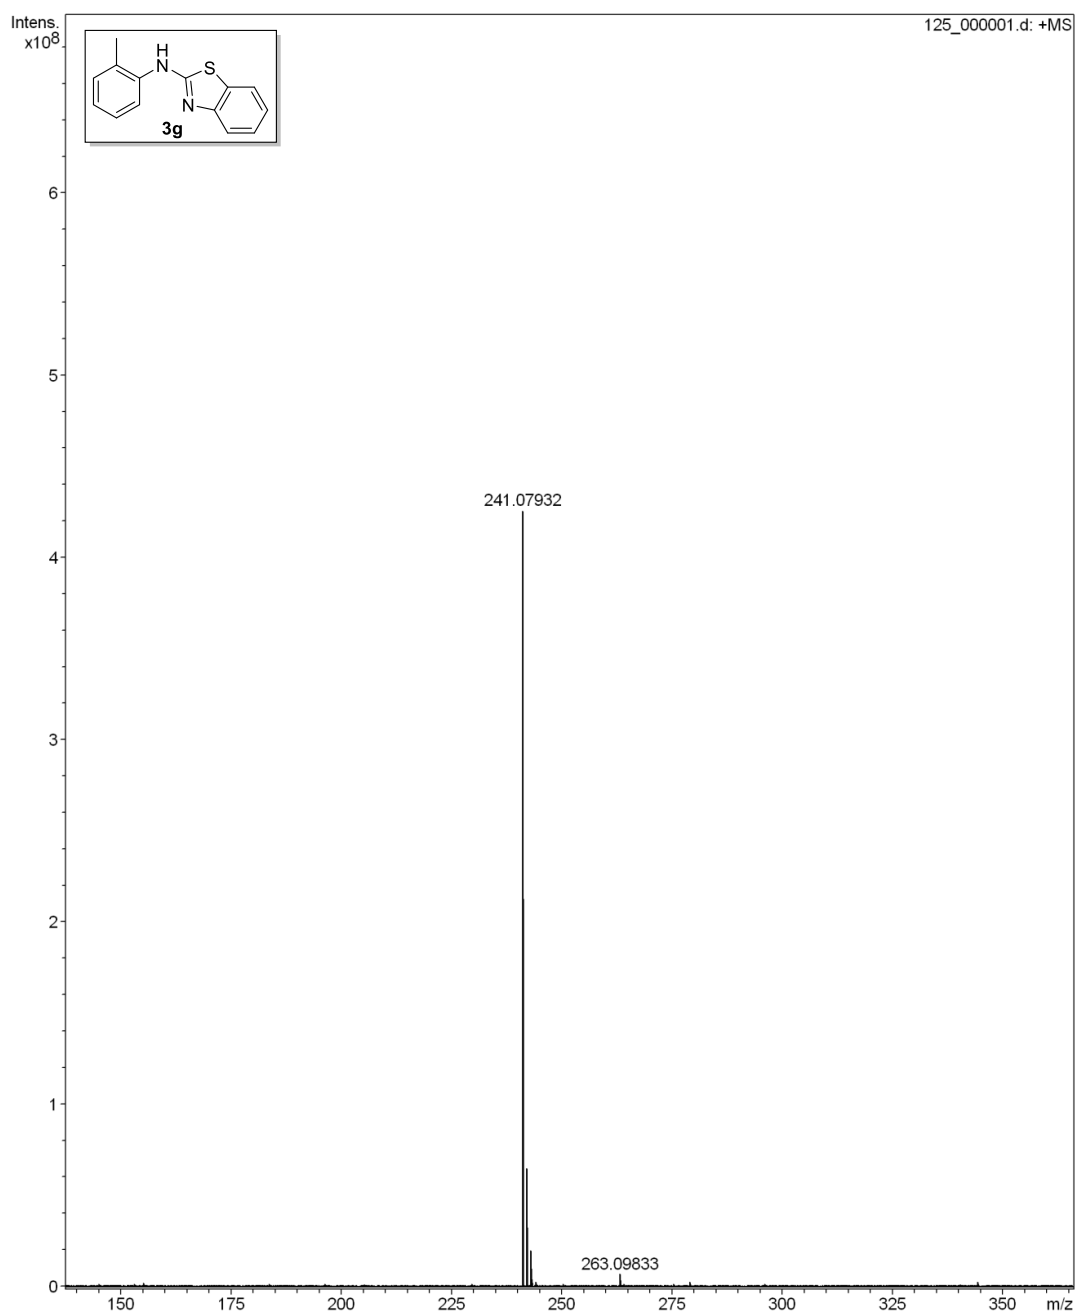

➤ <sup>1</sup>H NMR spectrum for **3h**

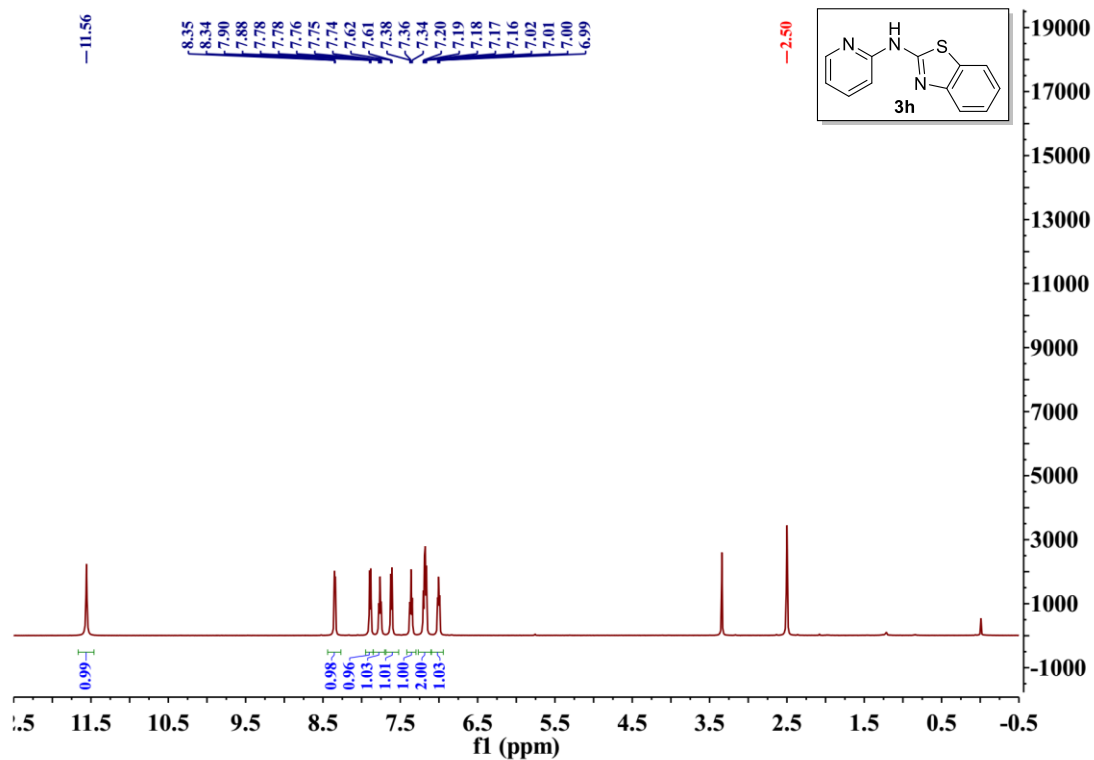

➤ <sup>13</sup>C NMR spectrum for **3h**

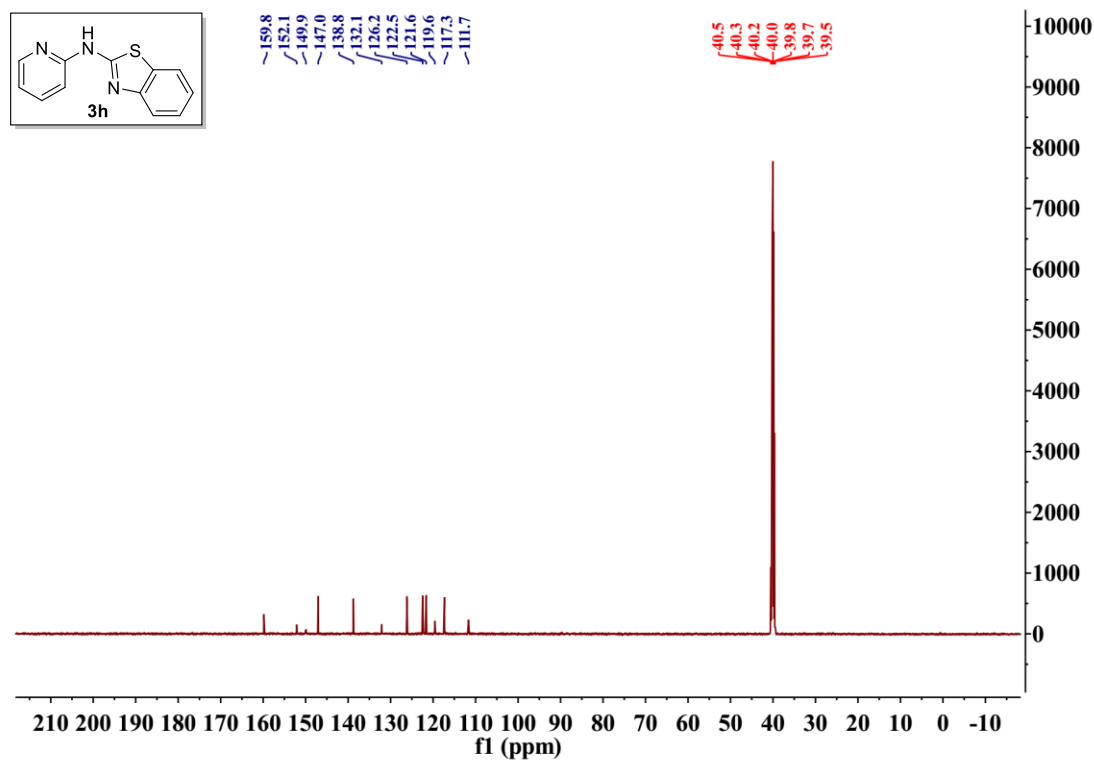

➤ HRMS spectrum for **3h**

Generic Display Report (all)

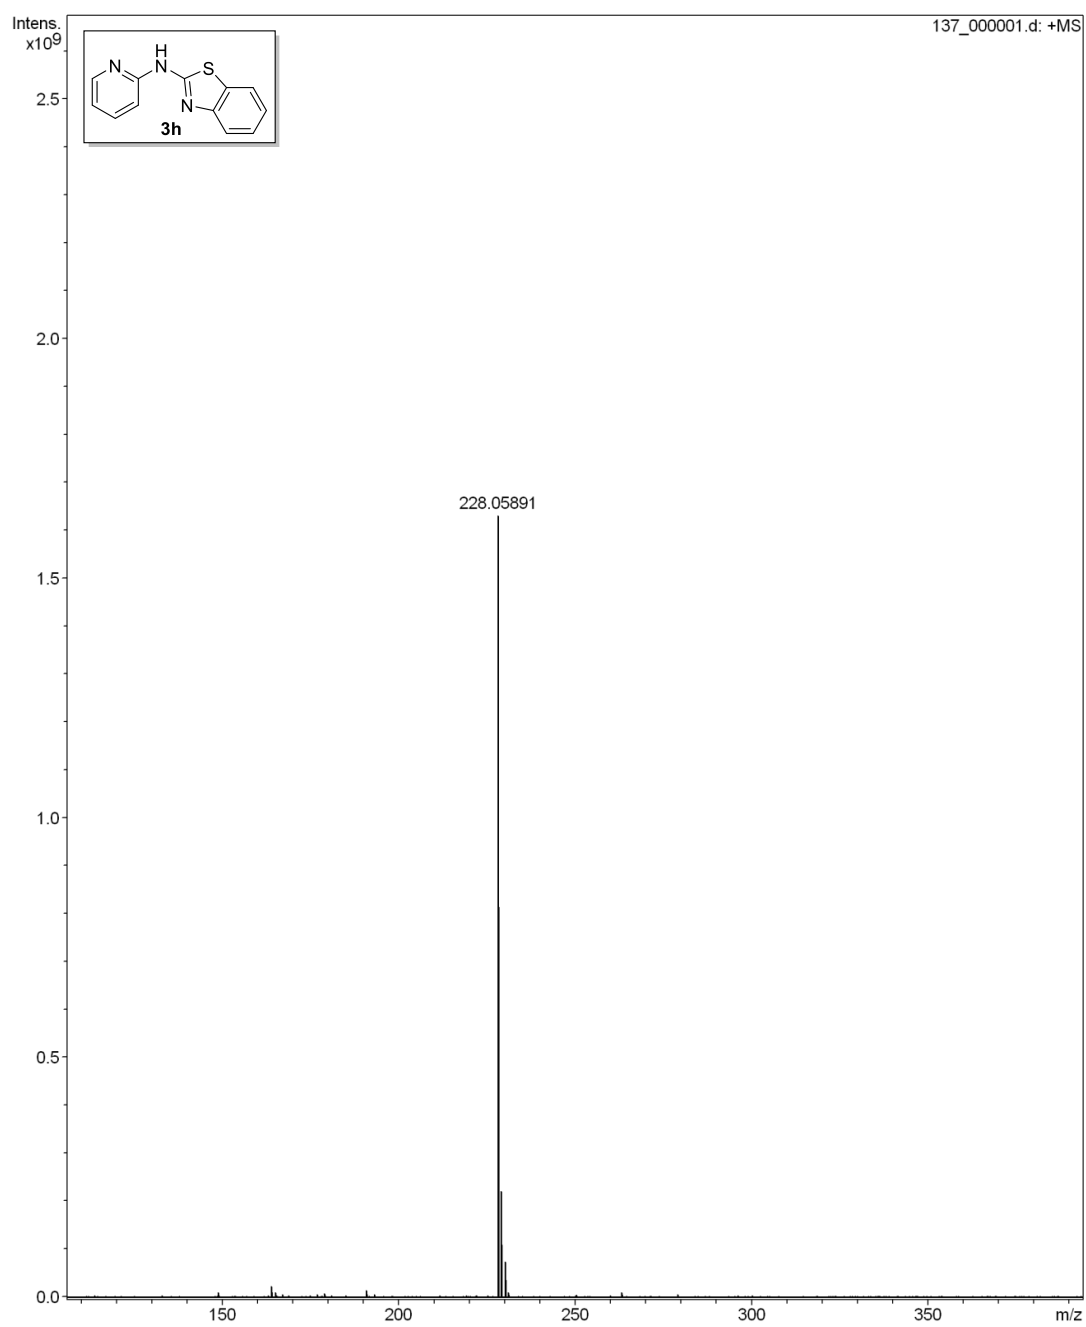

➤ <sup>1</sup>H NMR spectrum for **3i**

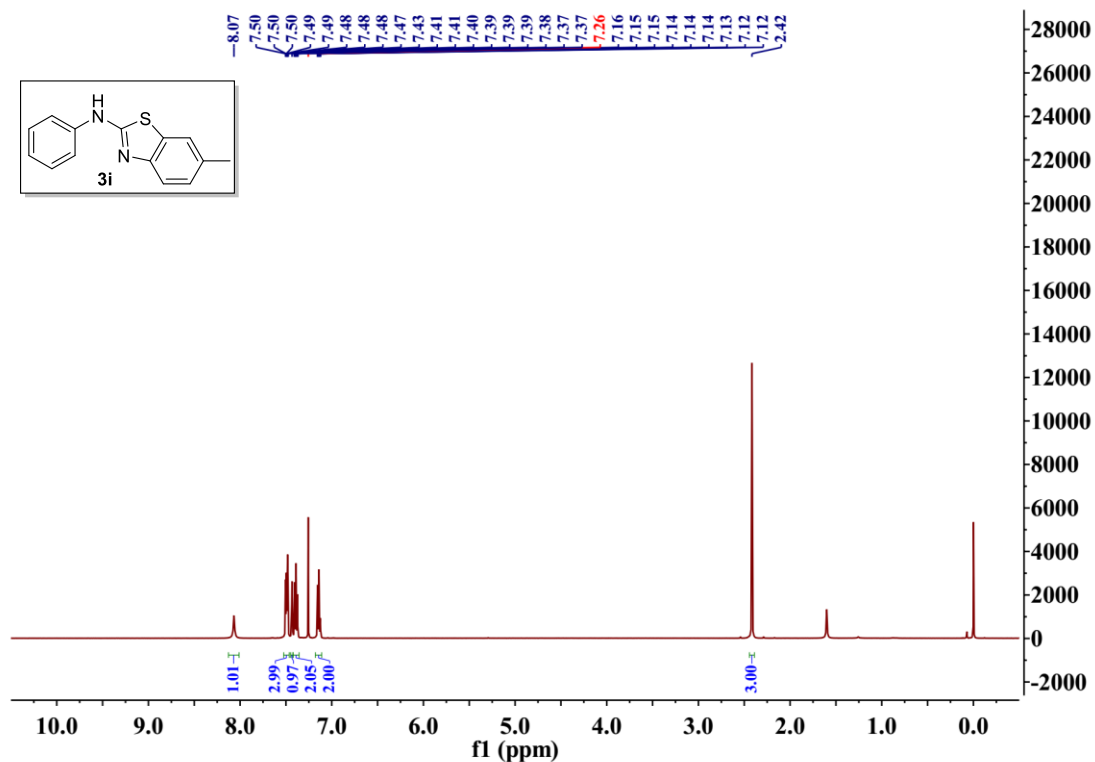

➤ <sup>13</sup>C NMR spectrum for **3i**

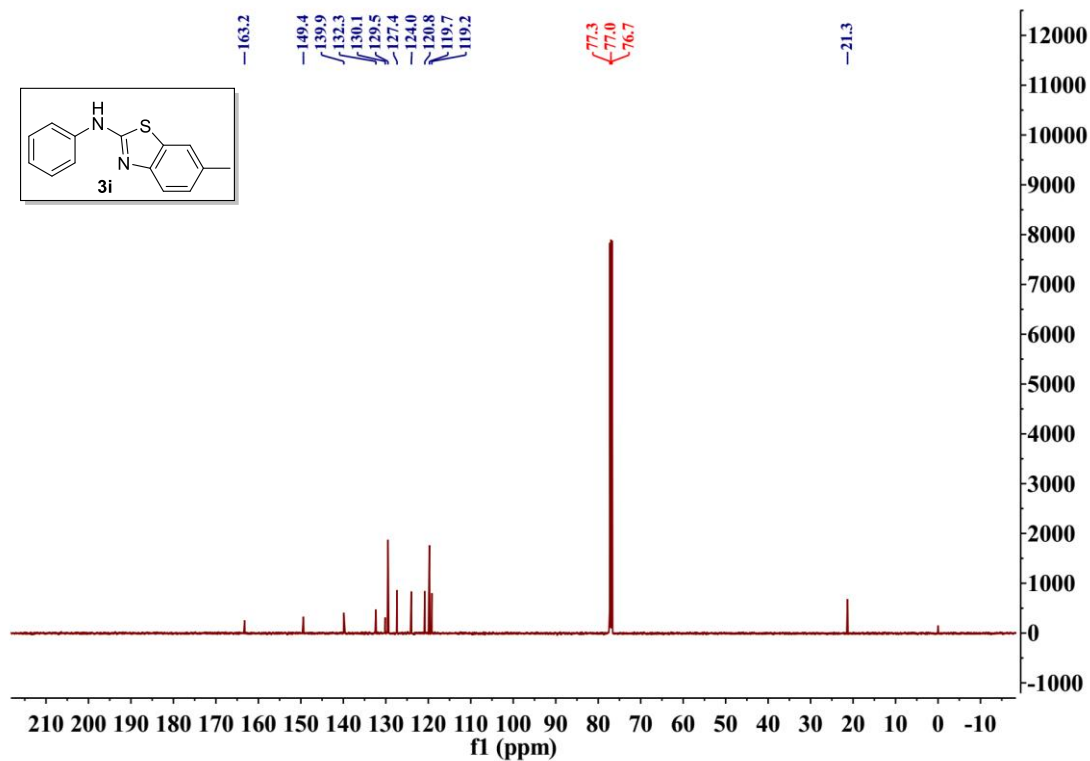

➤ HRMS spectrum for **3i**

Generic Display Report (all)

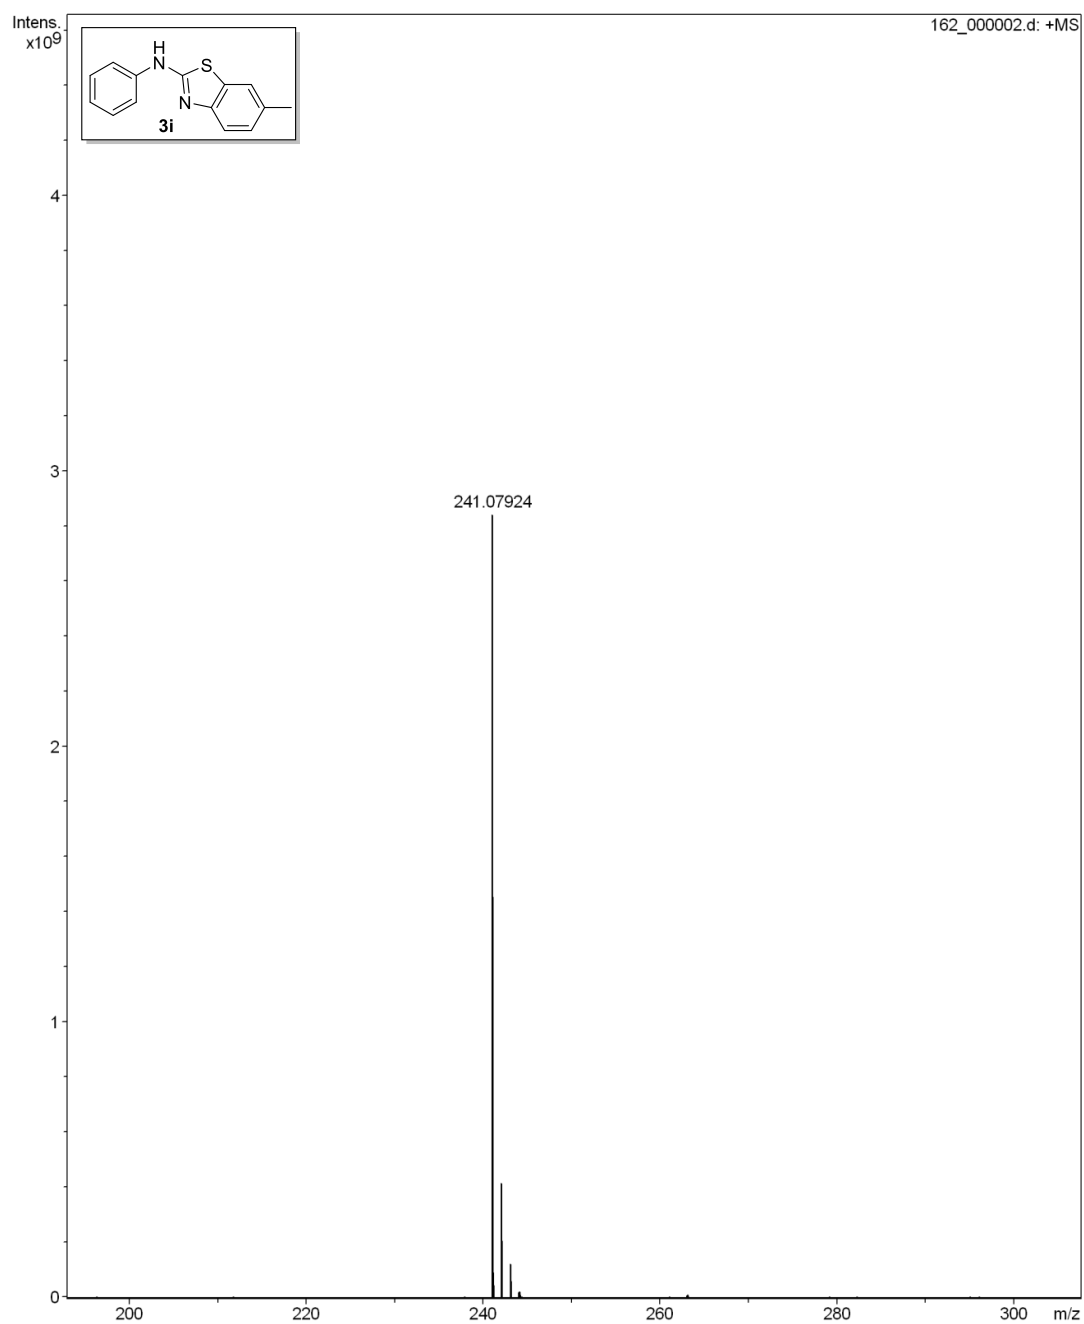

➤ <sup>1</sup>H NMR spectrum for **3j**

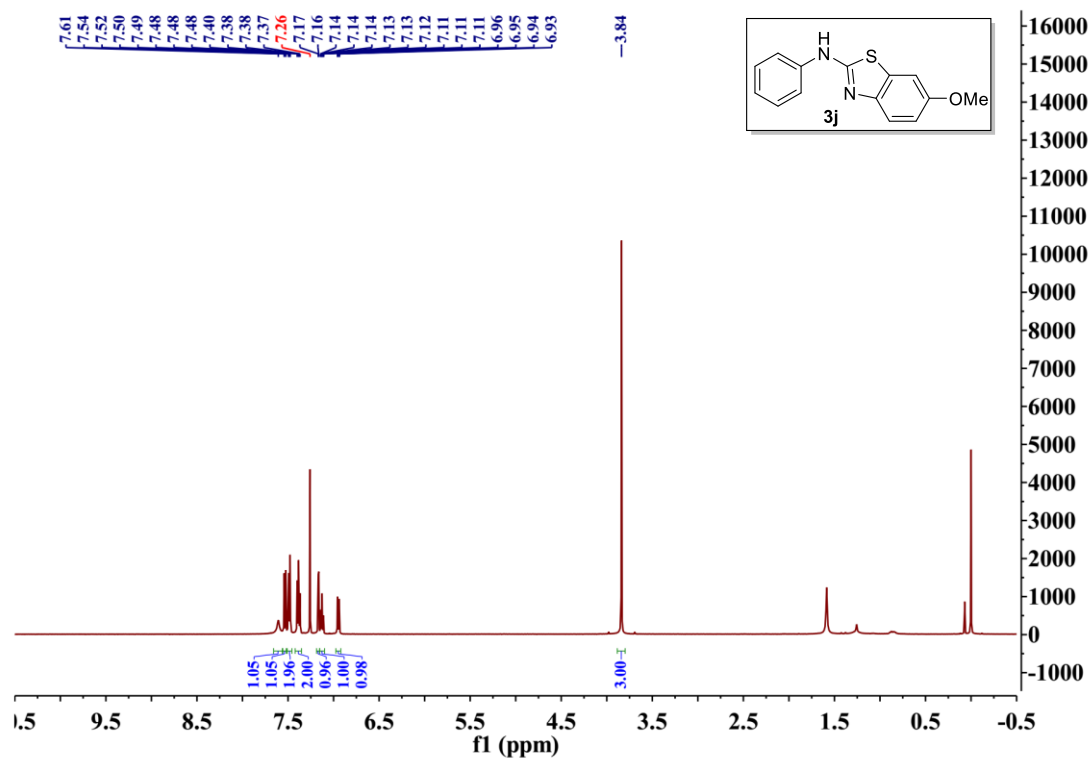

➤ <sup>13</sup>C NMR spectrum for **3j**

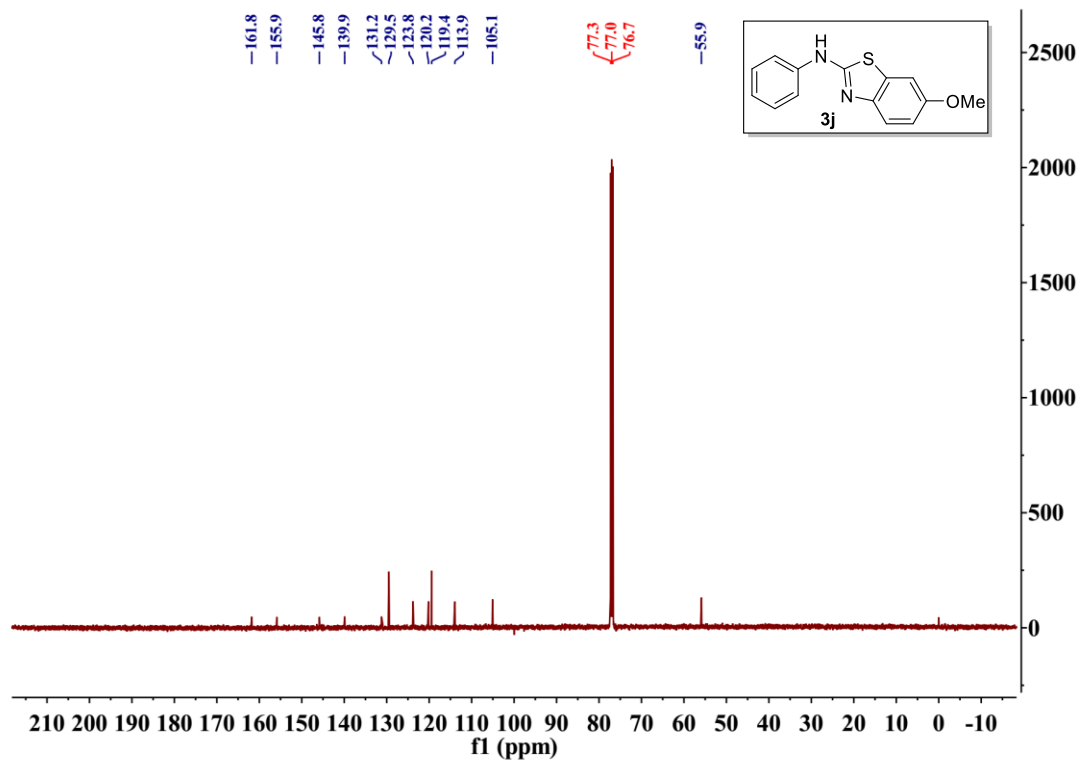

➤ HRMS spectrum for **3j**

Generic Display Report (all)

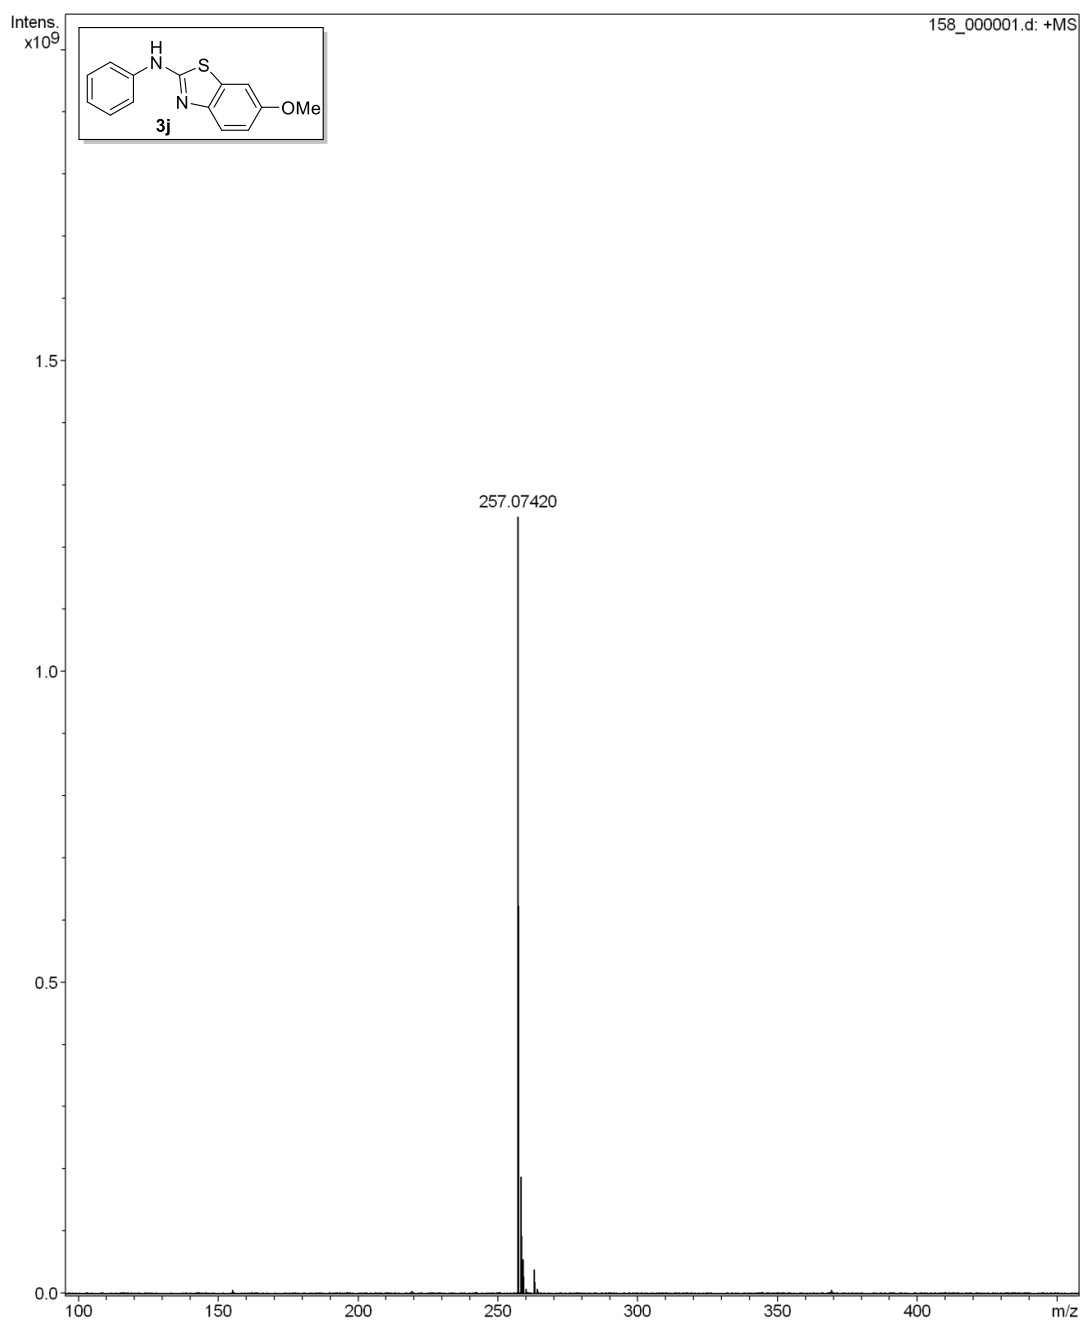

➤ <sup>1</sup>H NMR spectrum for **3k**

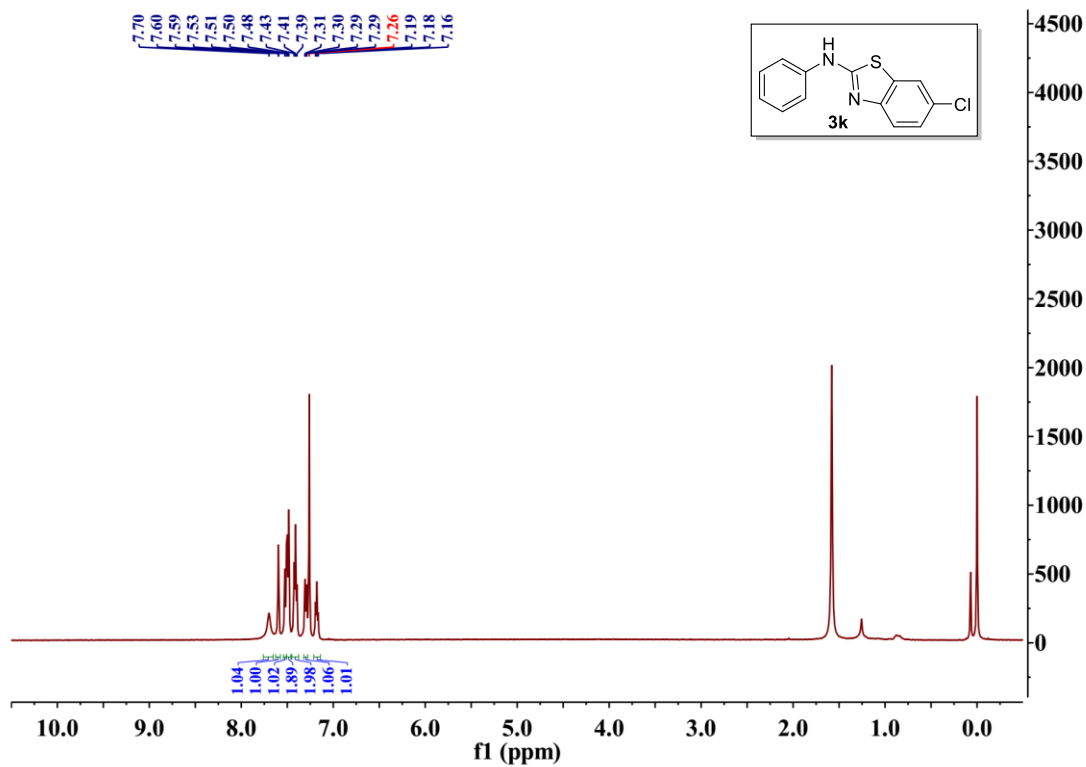

➤ <sup>13</sup>C NMR spectrum for **3k**

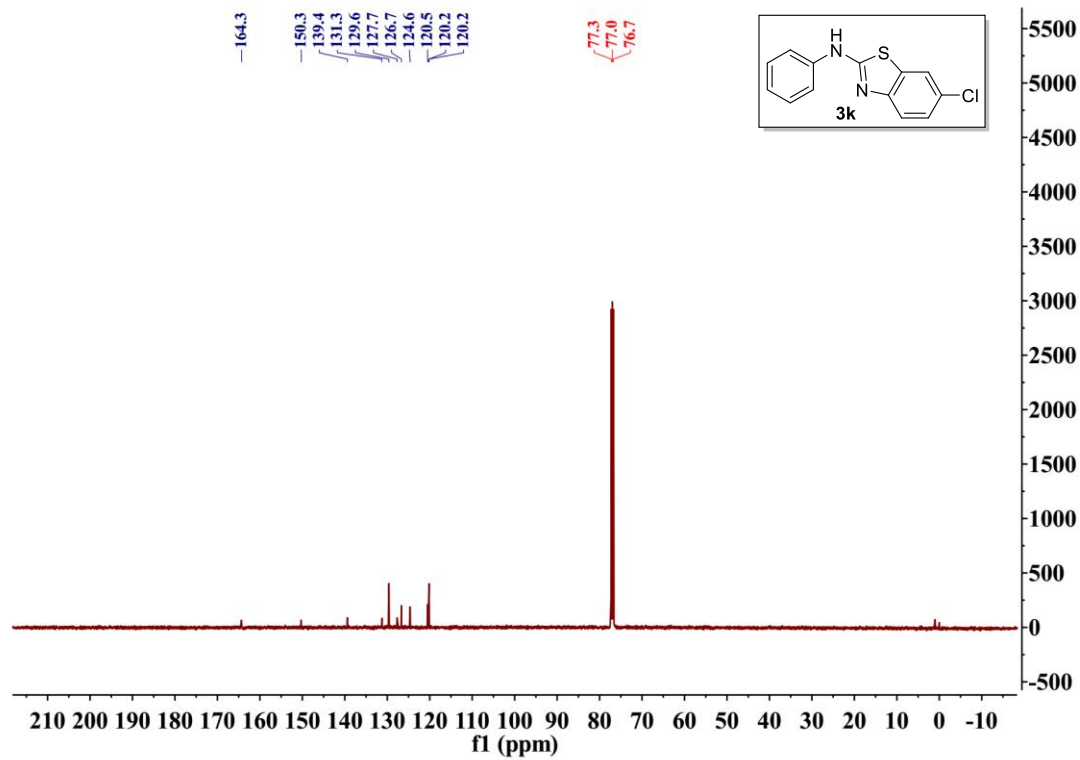



➤ HRMS spectrum for **3k**

Generic Display Report (all)

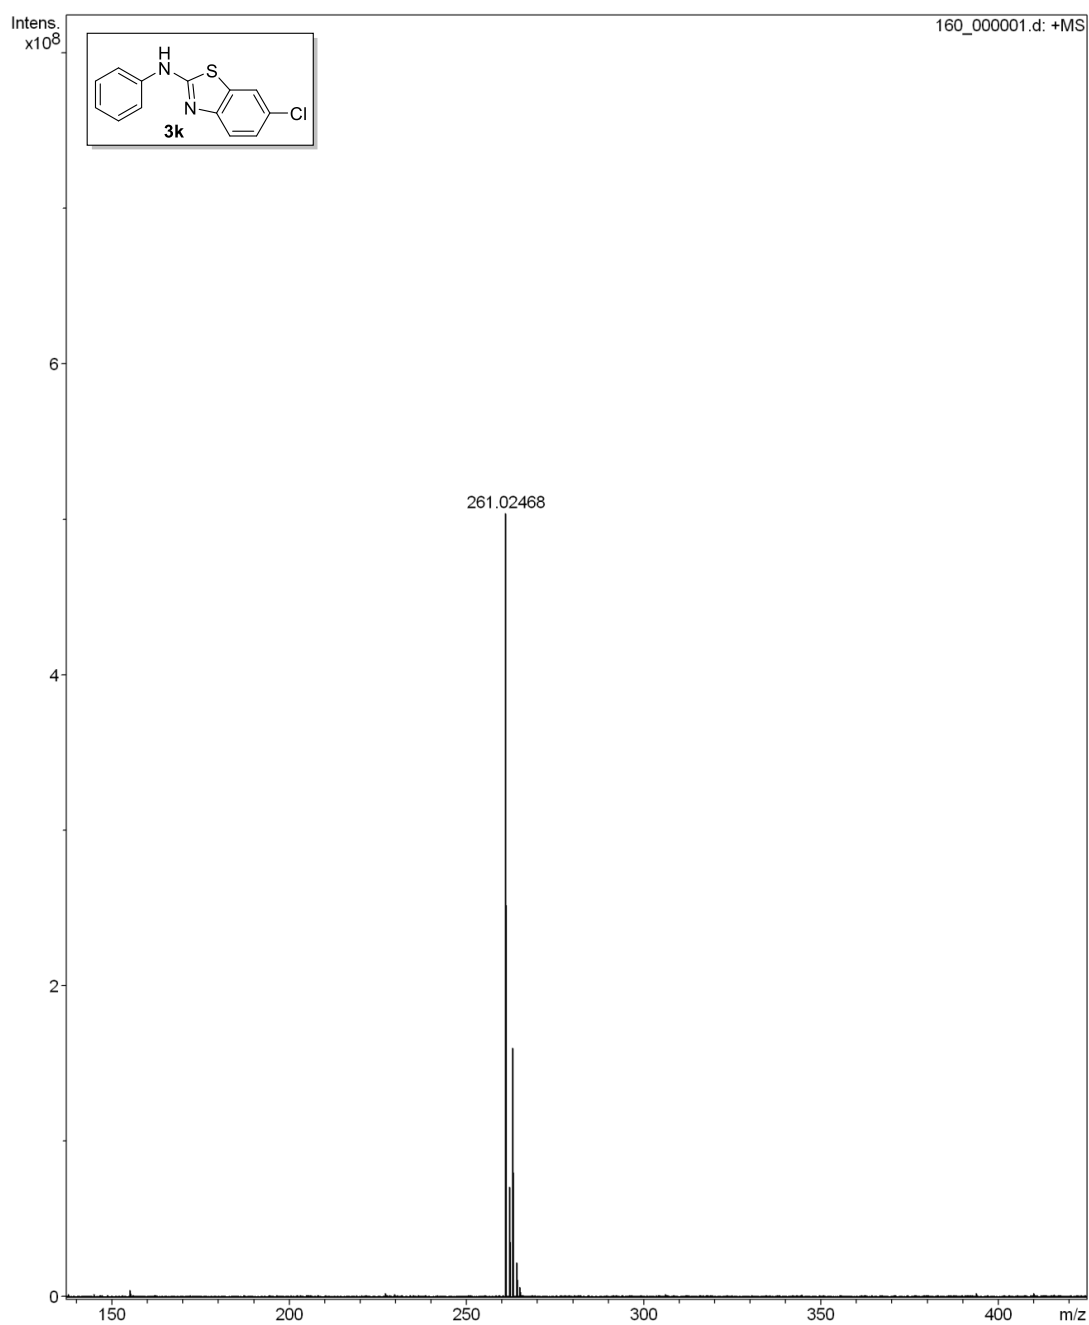

➤ <sup>1</sup>H NMR spectrum for **4a**

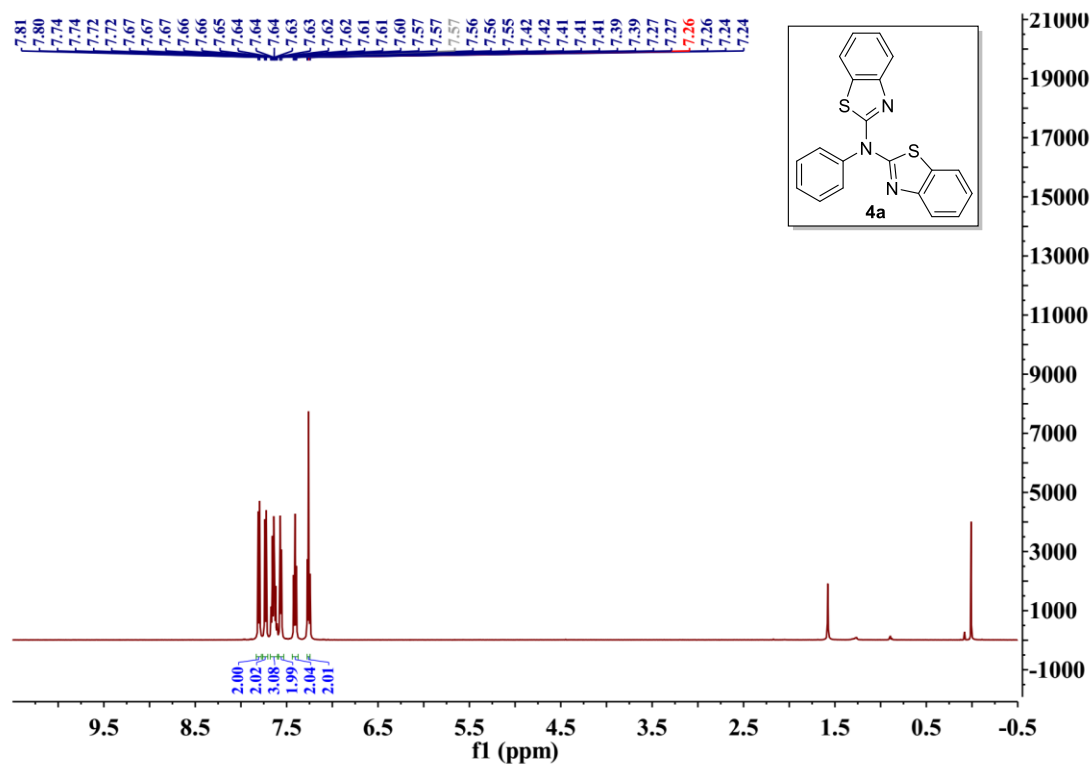

➤ <sup>13</sup>C NMR spectrum for **4a**

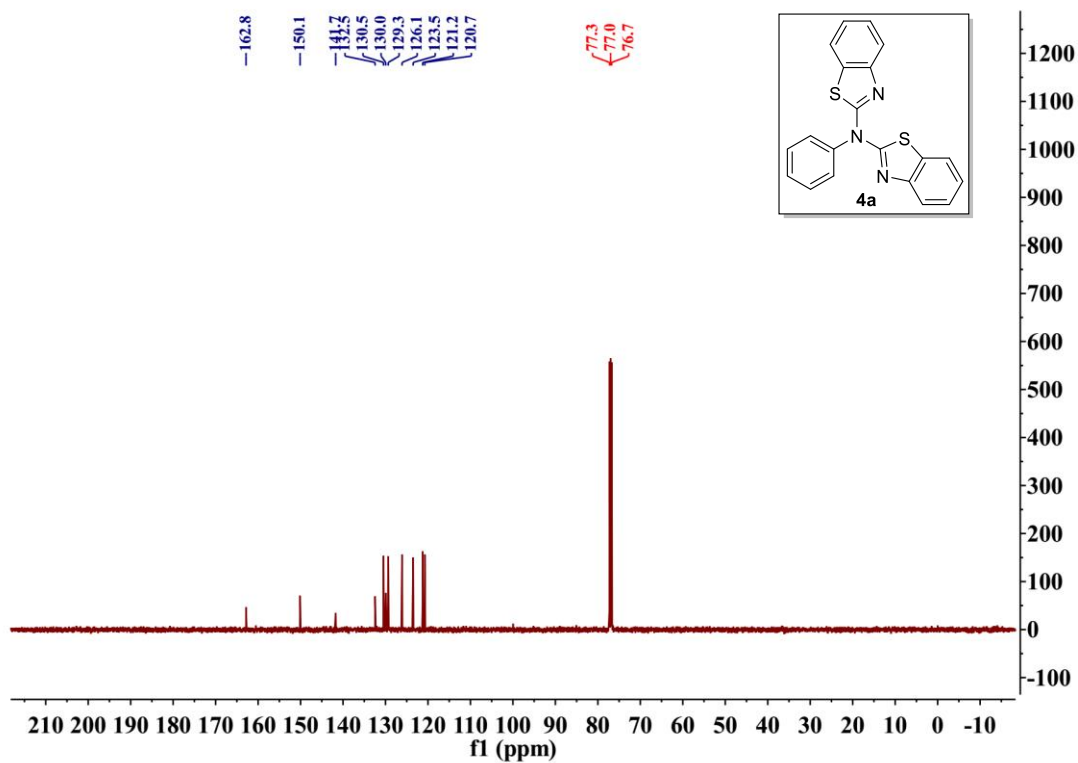

➤ HRMS spectrum for **4a**

W-C-120#19 RT: 0.21 AV: 1 SB: 7 0.42-0.59 NL: 8.70E8  
T: FTMS + c APCI corona Full ms [60.0000-900.0000]

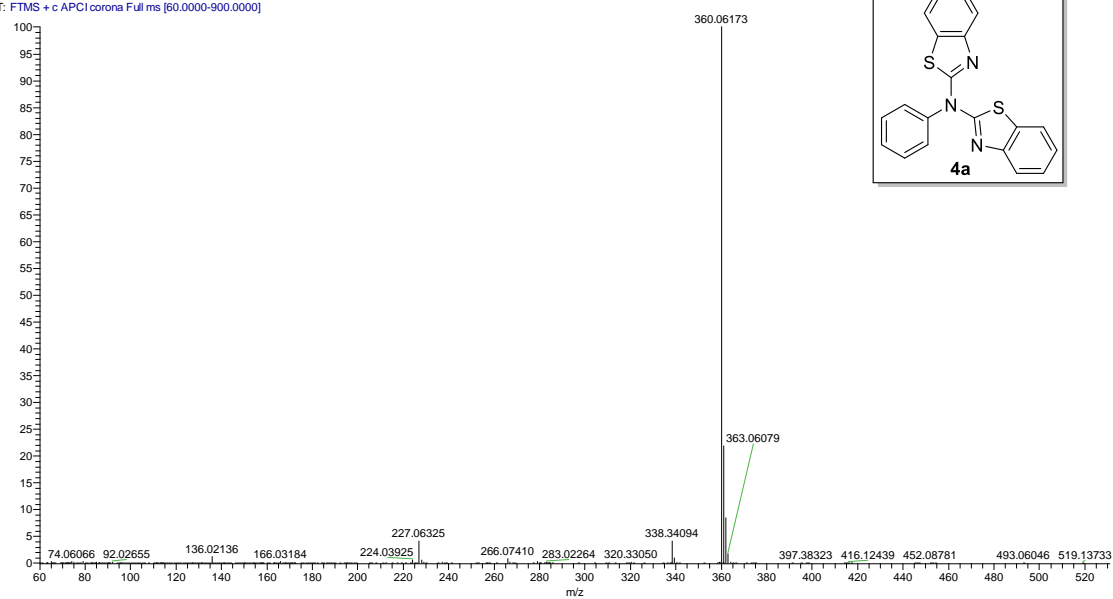

➤ <sup>1</sup>H NMR spectrum for **4b**

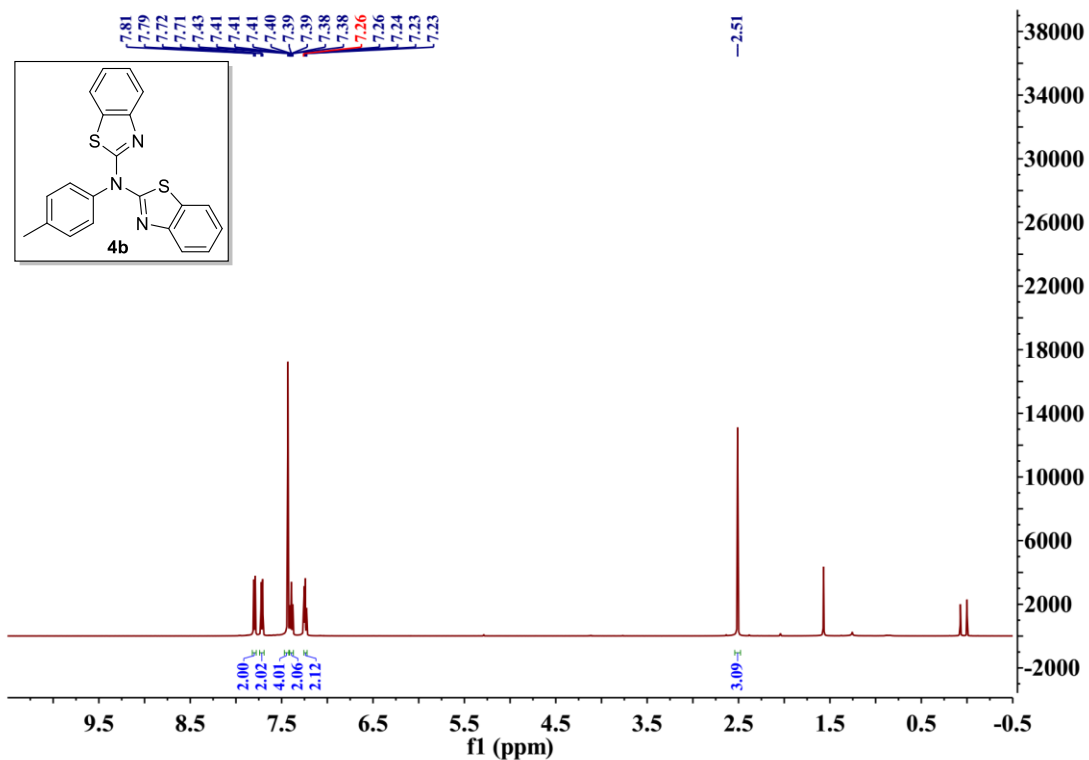

➤ <sup>13</sup>C NMR spectrum for **4b**

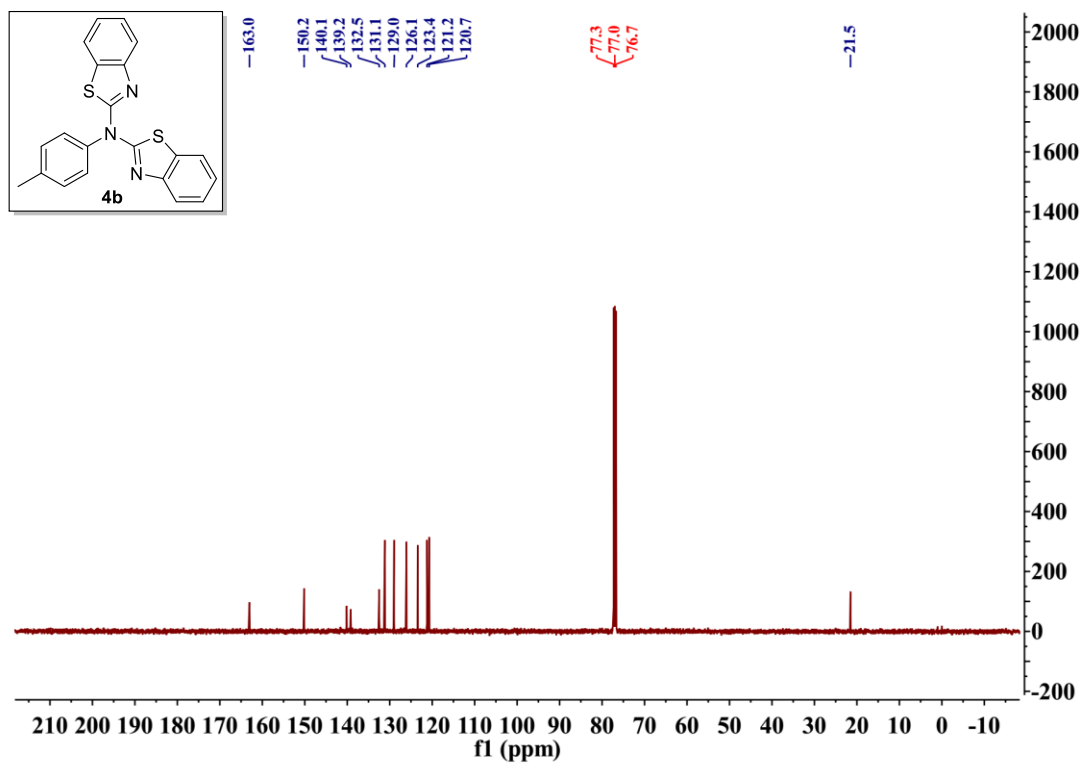

➤ HRMS spectrum for **4b**

W-C-128 #21 RT: 0.24 AV: 1 SB: 8 0.44-0.60 NL: 7.77E8  
T: FTMS + c APCI corona Full ms [60.0000-900.0000]

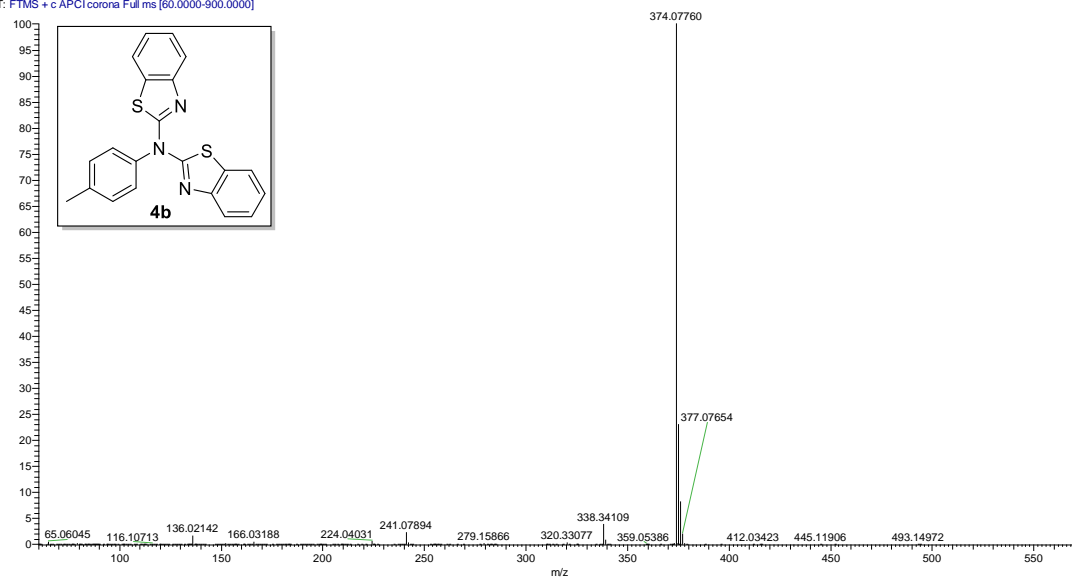

➤ <sup>1</sup>H NMR spectrum for **4c**

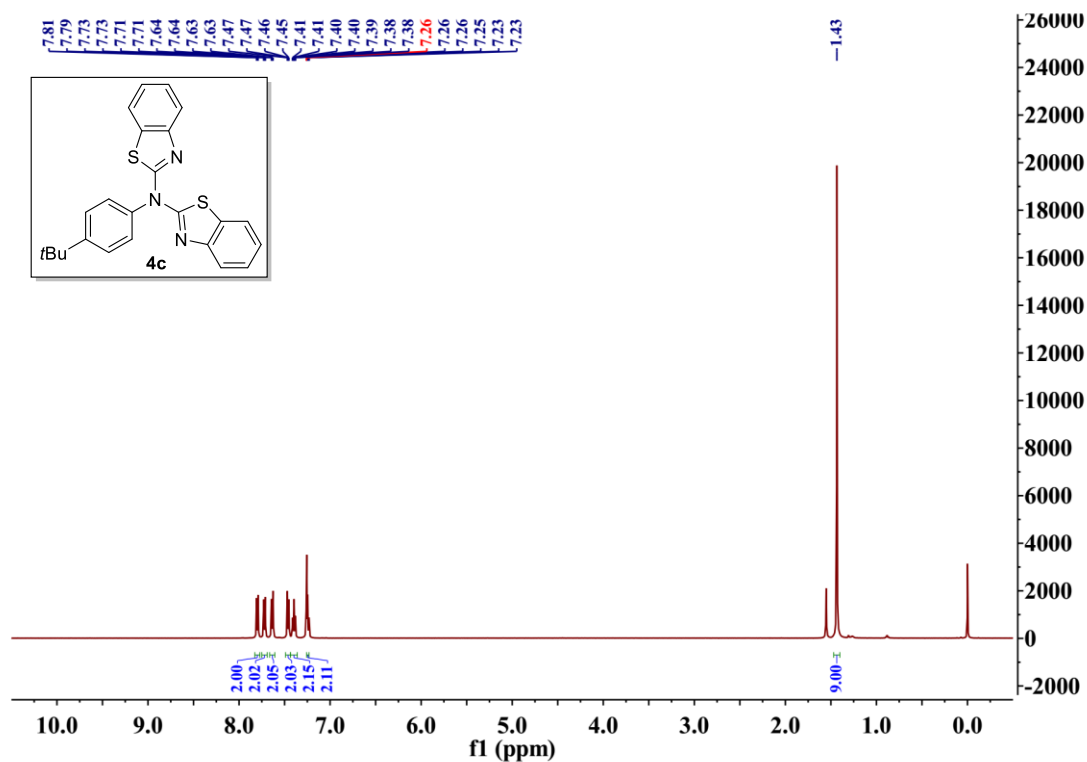

➤ <sup>13</sup>C NMR spectrum for **4c**

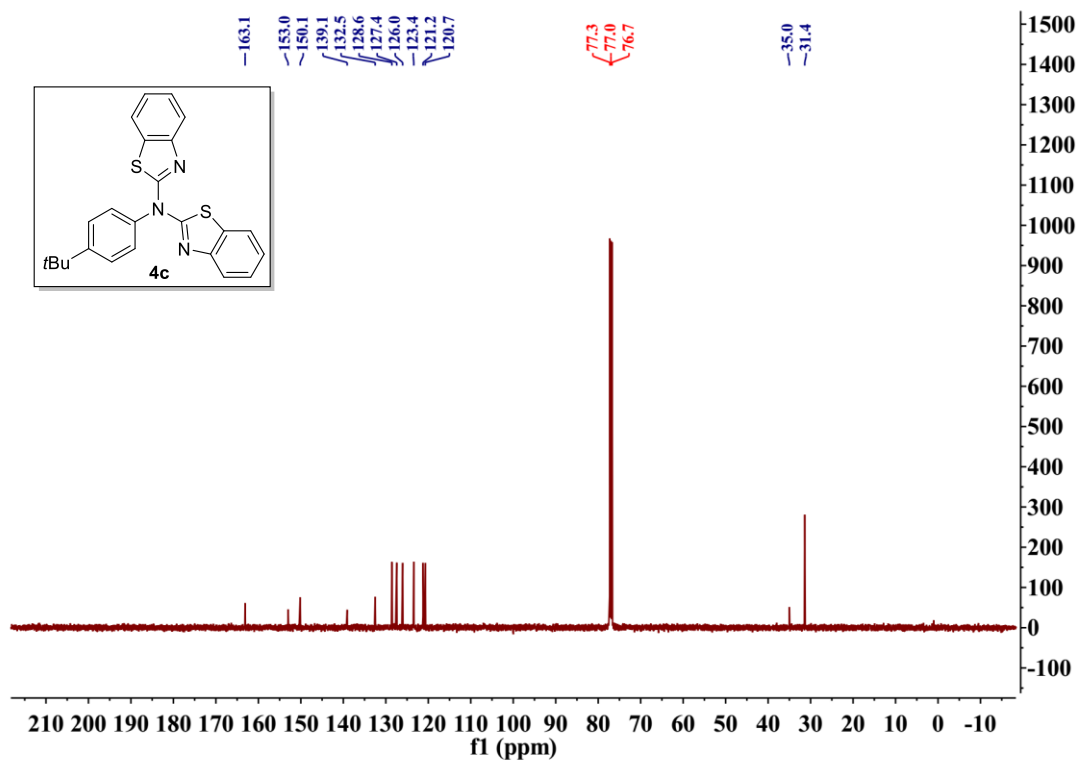

➤ HRMS spectrum for **4c**

W-C-139 #19 RT: 0.21 AV: 1 SB: 11 0.51-0.75 NL: 3.64E8  
T: FTMS + c APCI/corona Full ms [60.0000-900.0000]

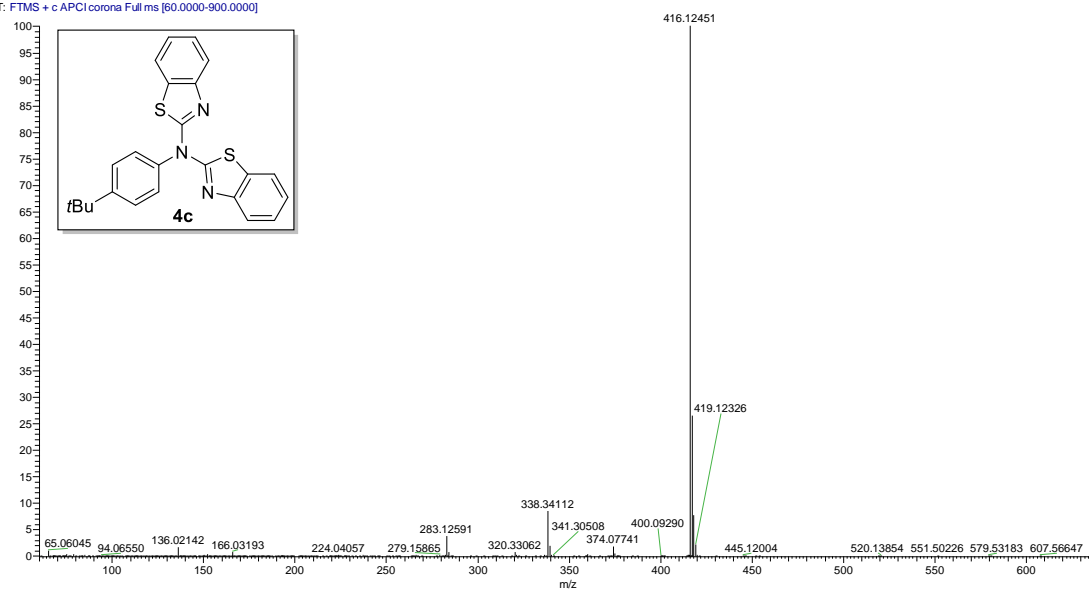

➤ <sup>1</sup>H NMR spectrum for **4d**

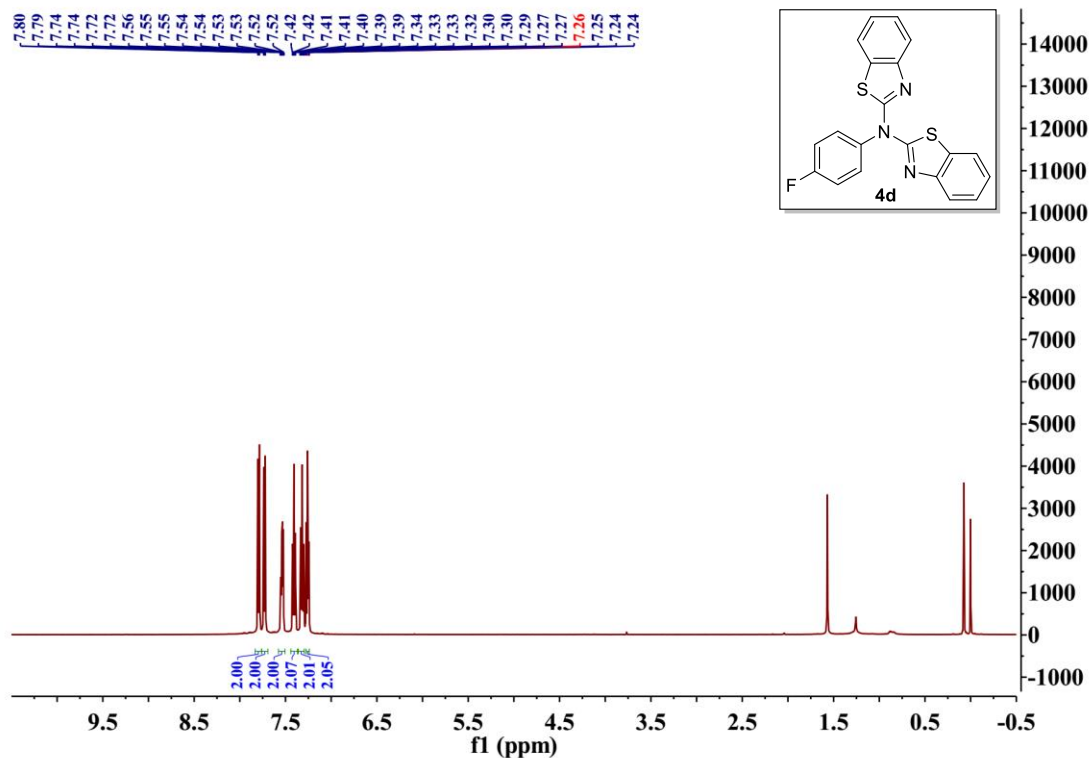

➤ <sup>13</sup>C NMR spectrum for **4d**

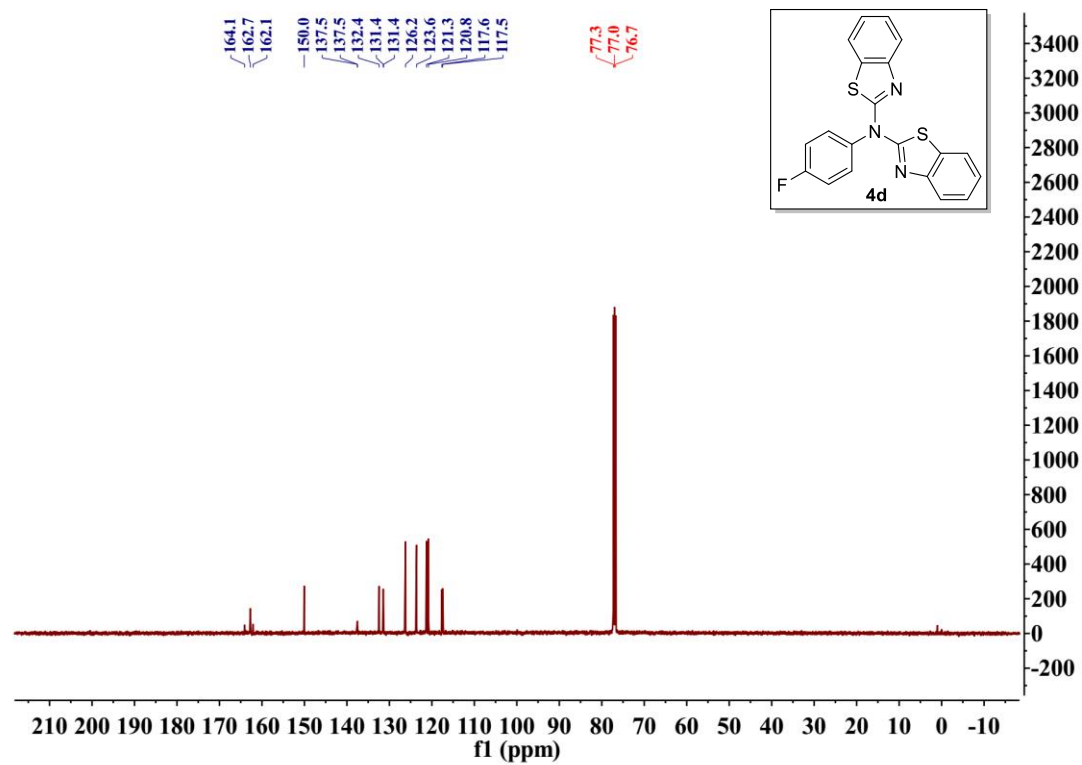



➤ HRMS spectrum for **4d**

W-C-132 #19 RT: 0.21 AV: 1 SB: 8 0.44-0.63 NL: 1.15E9  
T: FTMS + c APCI corona Full ms [60.0000-900.0000]

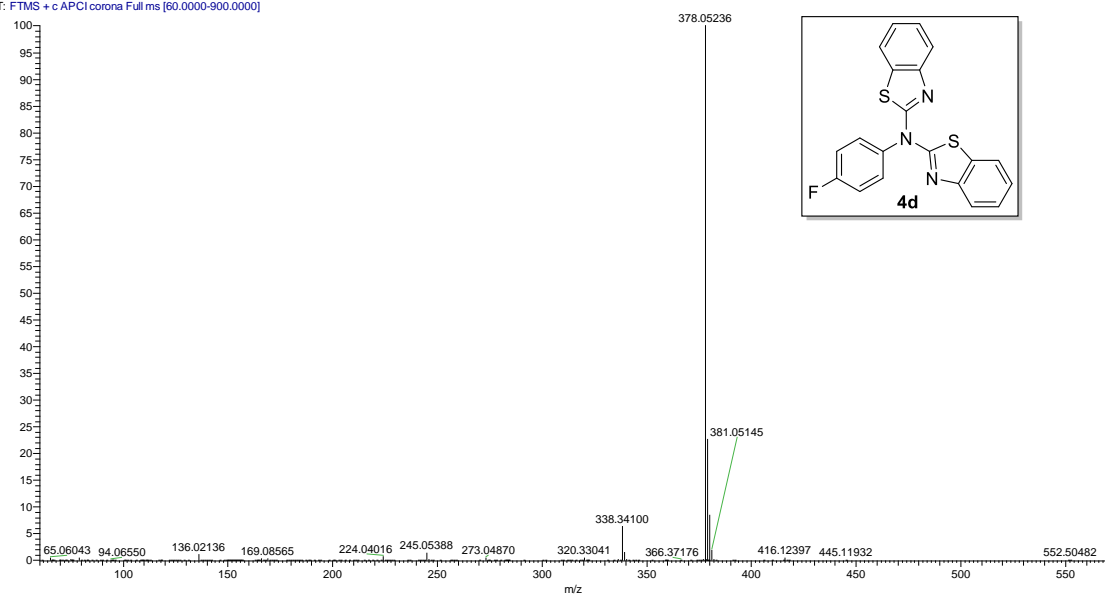

➤ <sup>1</sup>H NMR spectrum for **4e**

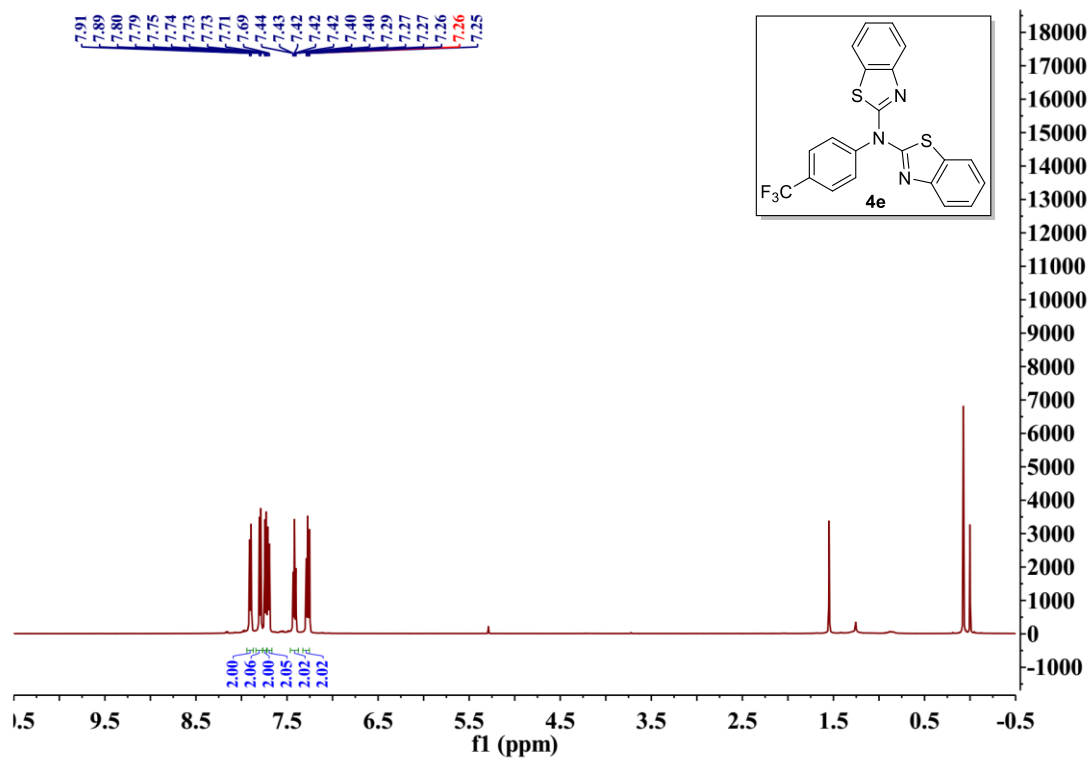

➤ <sup>13</sup>C NMR spectrum for **4e**

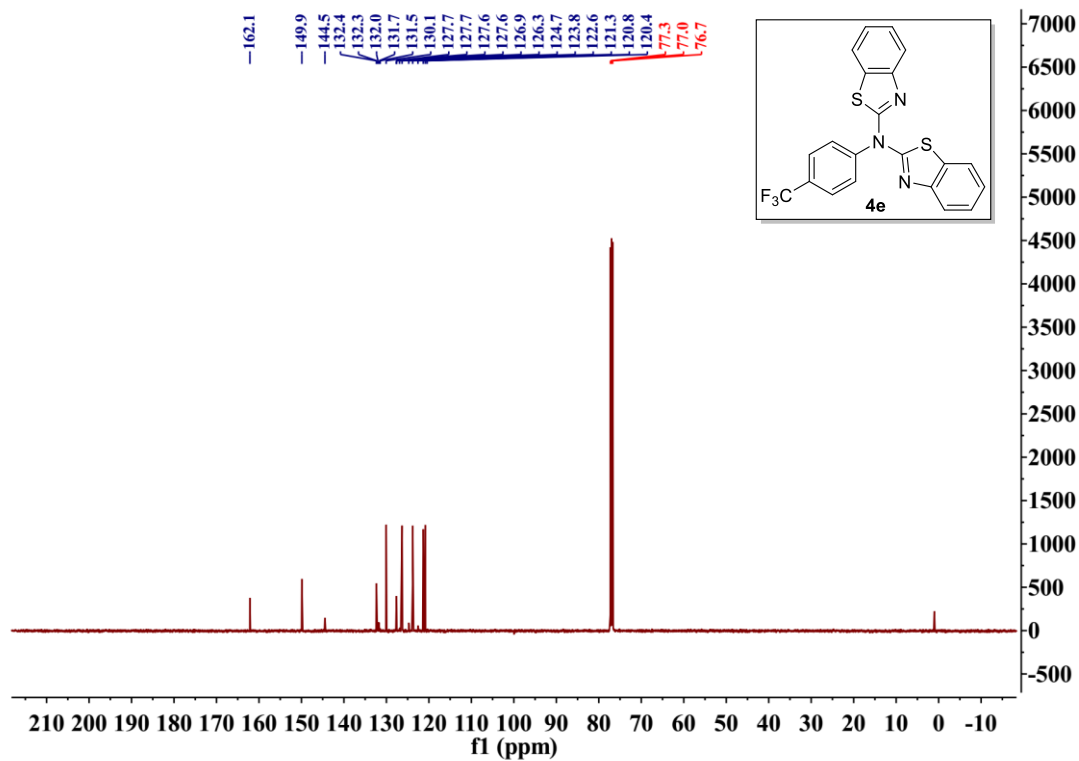

➤ HRMS spectrum for **4e**

WC-134 #19 RT: 0.21 AV: 1 SB: 8 0.42-0.60 NL: 3.44E8  
T: FTMS + c APCI corona Full ms [60.0000-900.0000]

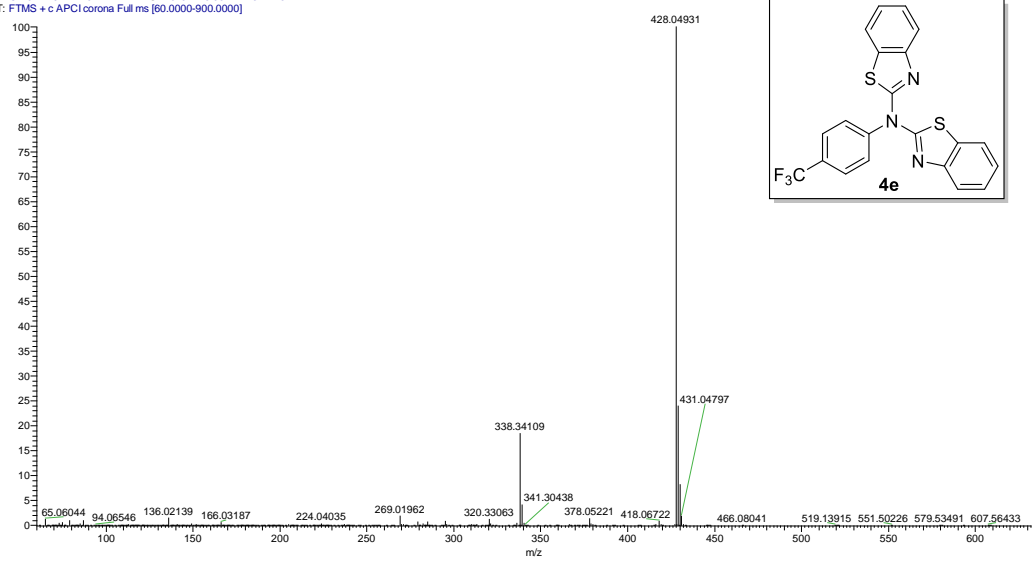

➤ <sup>1</sup>H NMR spectrum for **4f**

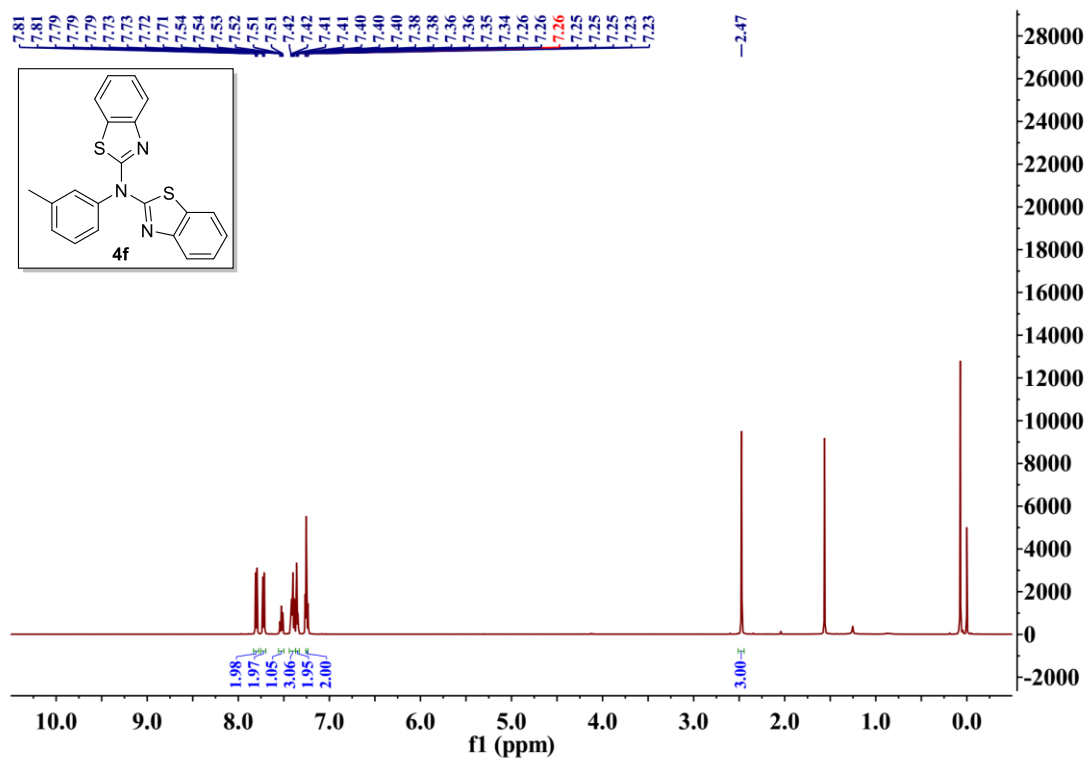

➤ <sup>13</sup>C NMR spectrum for **4f**

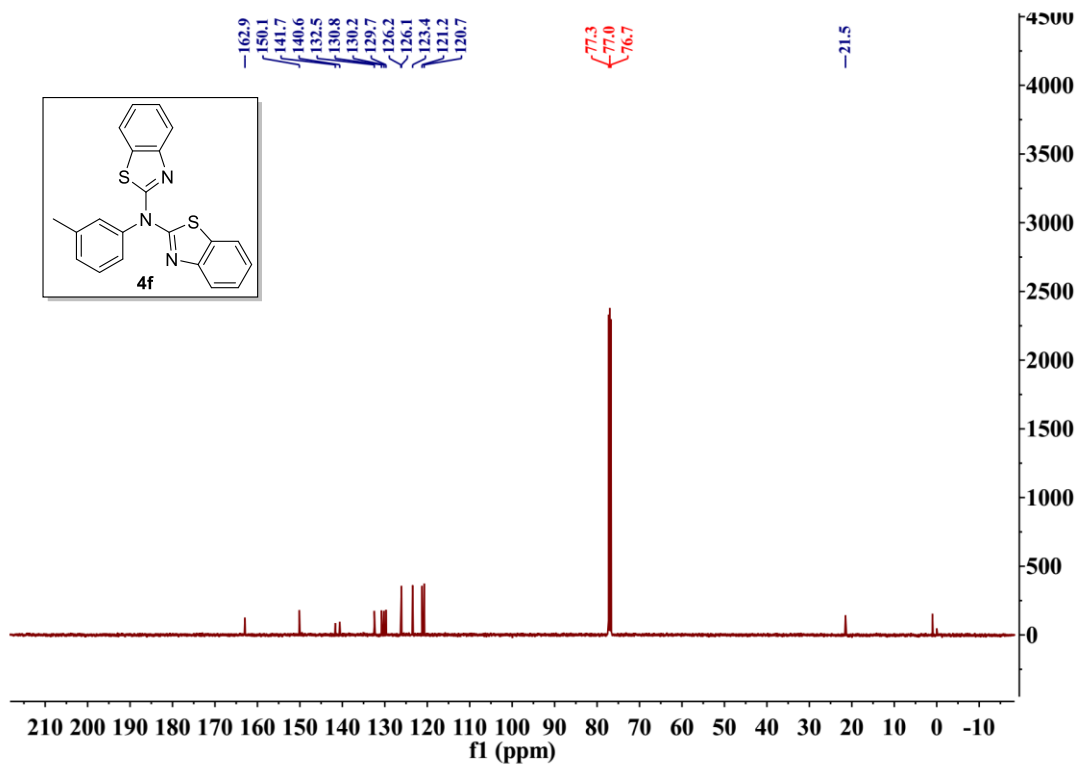

➤ HRMS spectrum for **4f**

W-C-126 #19 RT: 0.21 AV: 1 SB: 6 0.50-0.64 NL: 5.43E8  
T: FTMS + c APCI corona Full ms [50.0000-900.0000]

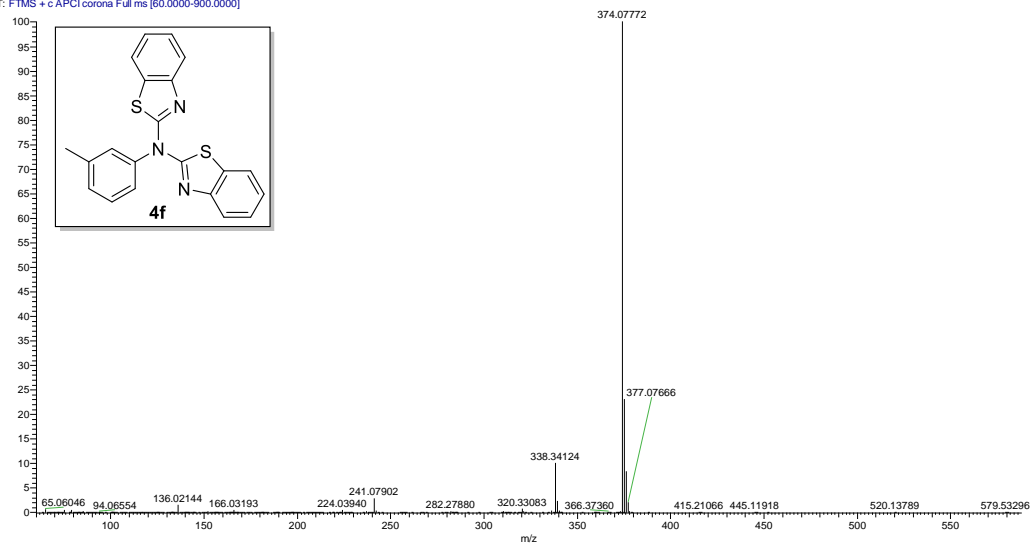

➤ <sup>1</sup>H NMR spectrum for **4g**

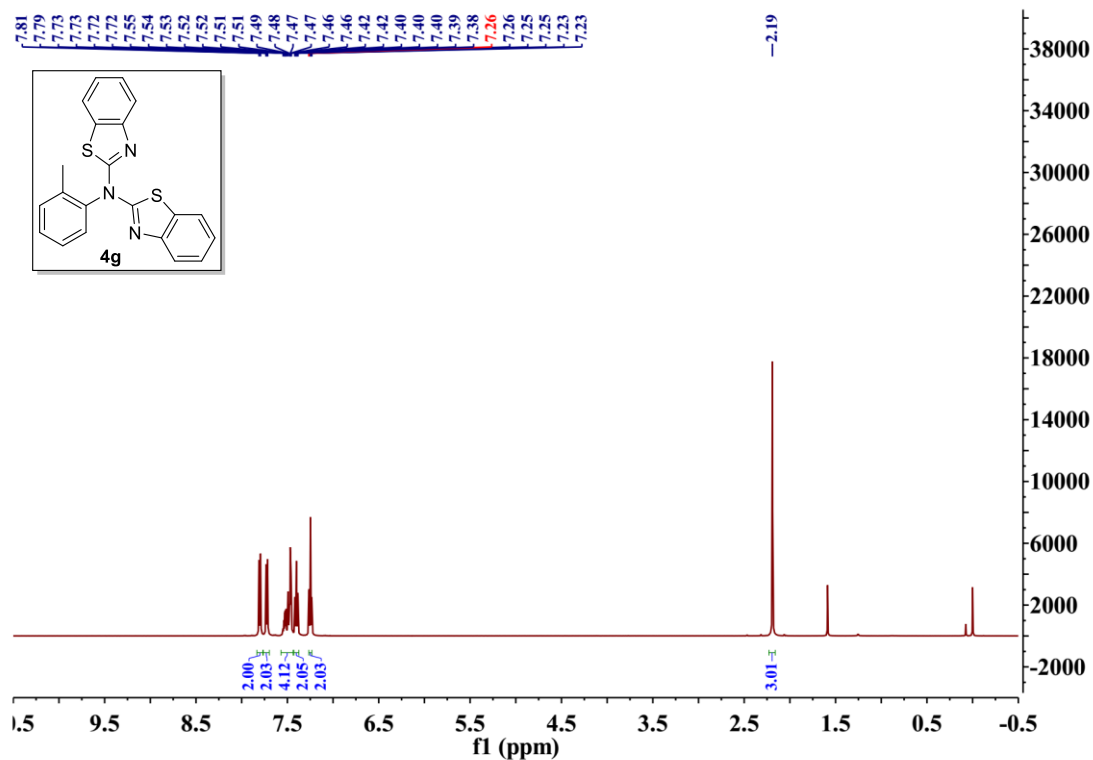

➤ <sup>13</sup>C NMR spectrum for **4g**

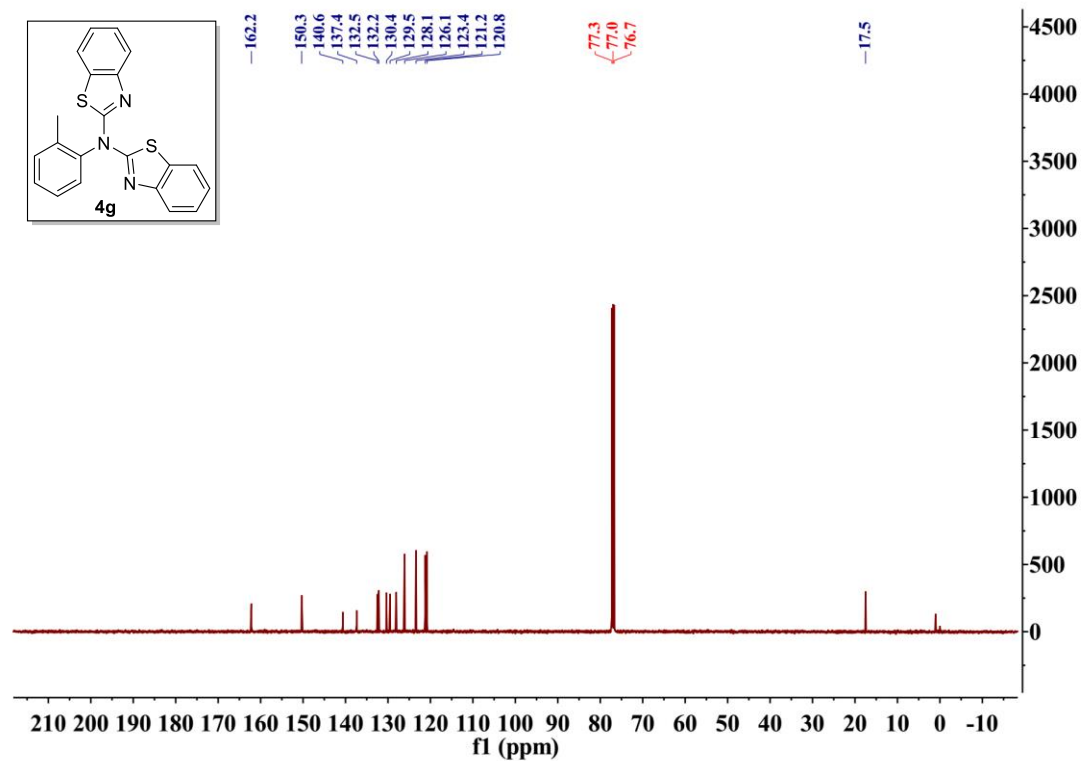

➤ HRMS spectrum for **4g**

W-C-124 #19 RT: 0.21 AV: 1 SB: 7 0.43-0.58 NL: 1.50E9  
T: FTMS + c APCI corona Full ms [60.0000-900.0000]

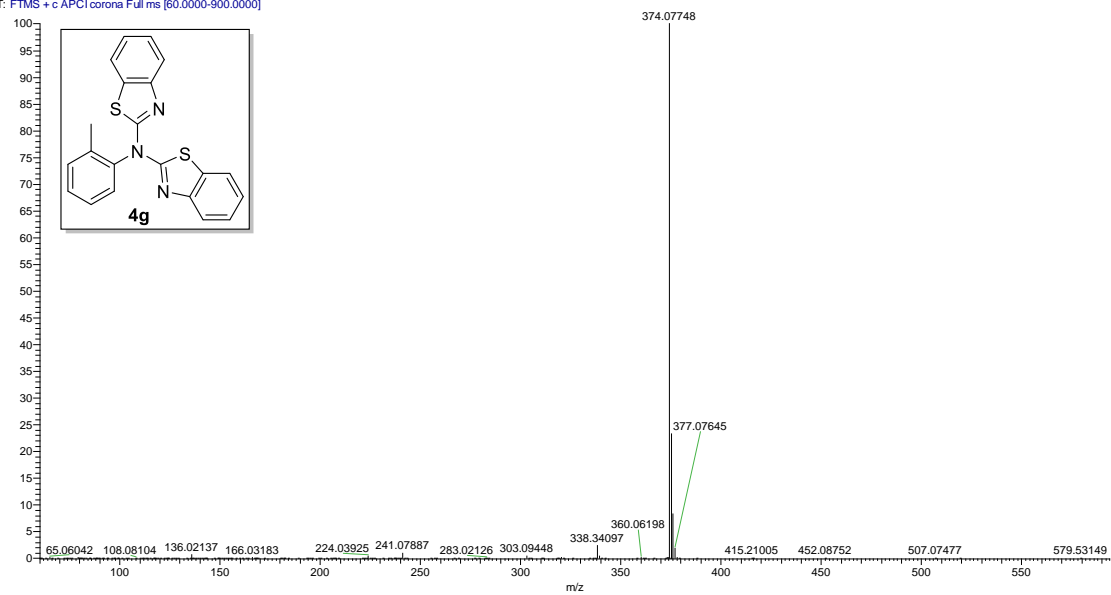

➤ <sup>1</sup>H NMR spectrum for **4i**

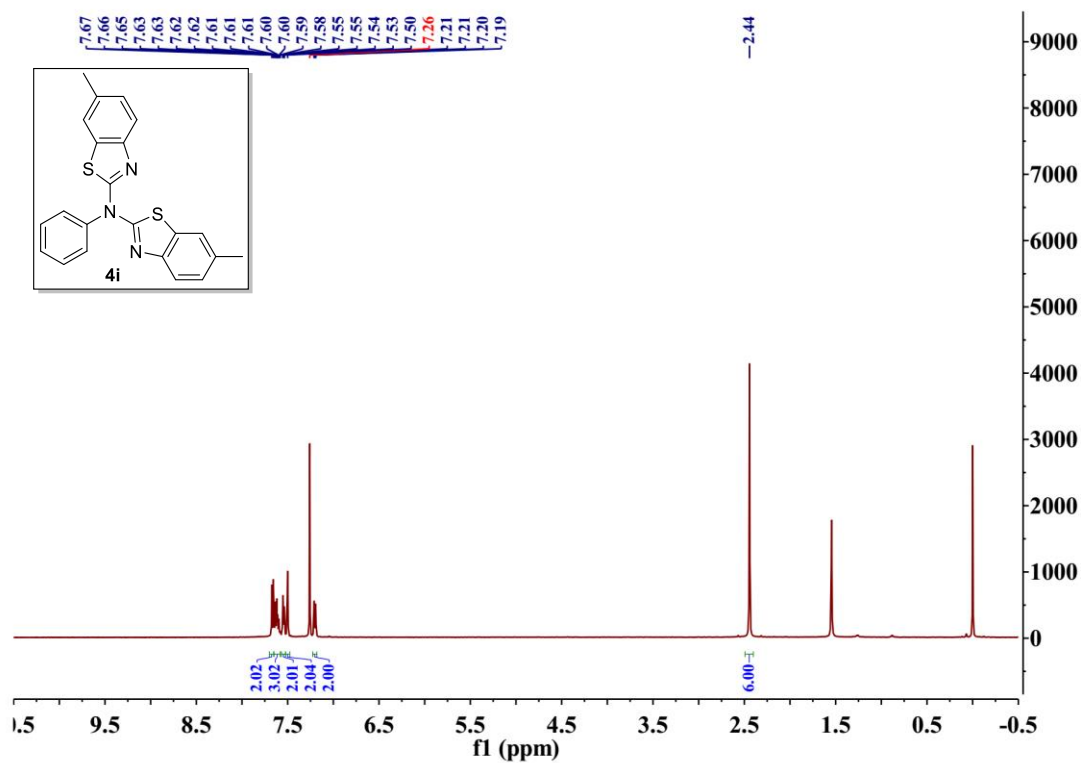

➤ <sup>13</sup>C NMR spectrum for **4i**

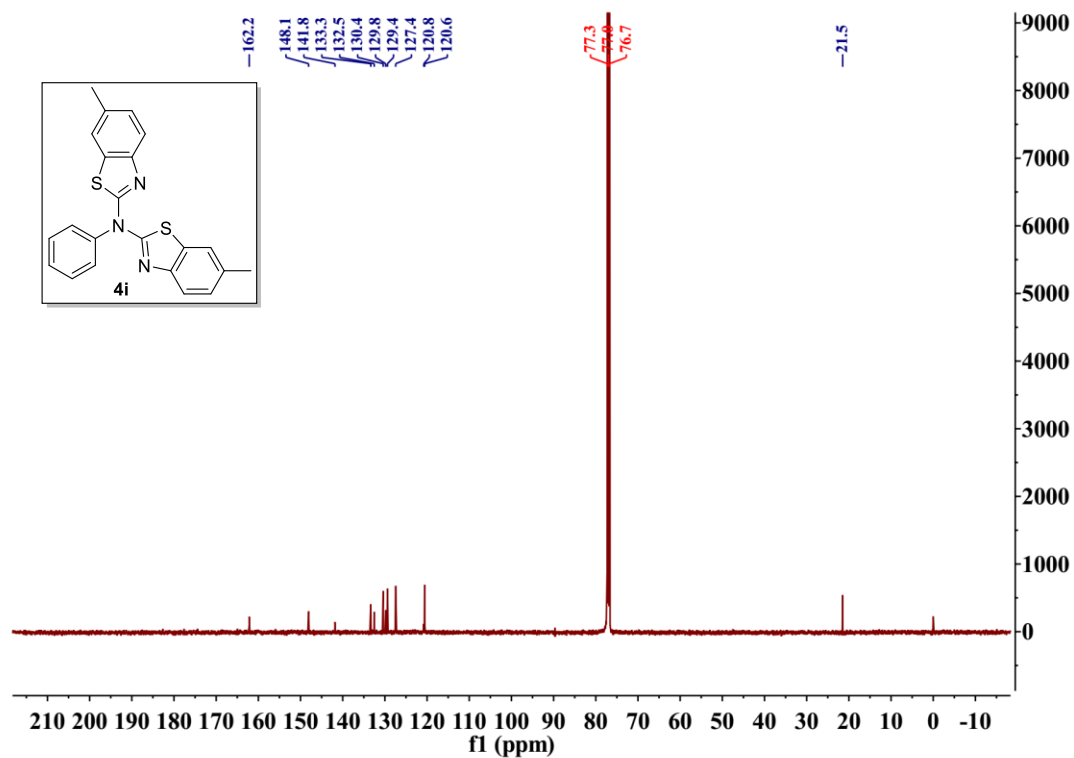



➤ HRMS spectrum for **4i**

W-C-161 #19 RT: 0.21 AV: 1 SB: 11 0.42-0.65 NL: 2.29E8  
T: FTMS + e APCI corona Full ms [50.0000-900.0000]

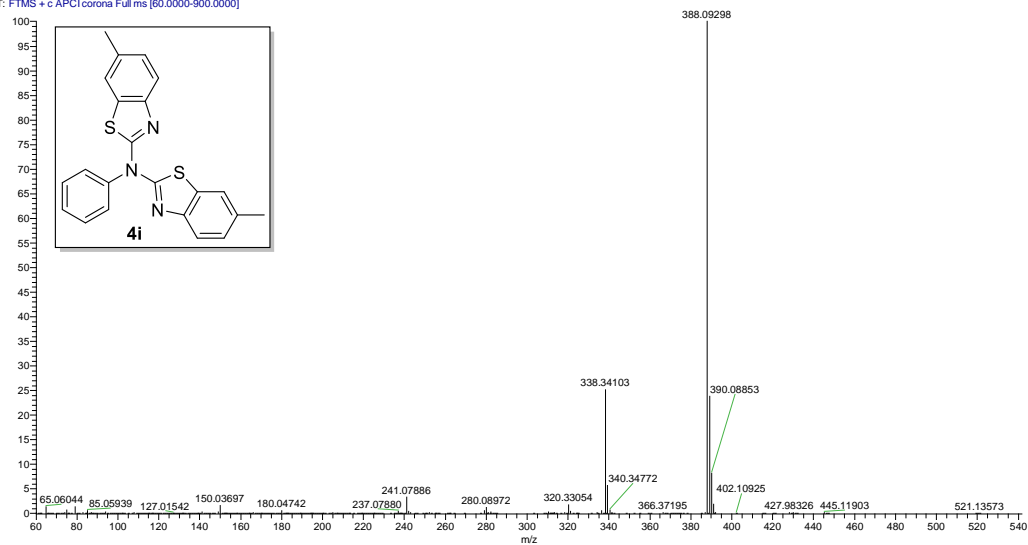

➤ <sup>1</sup>H NMR spectrum for **4j**

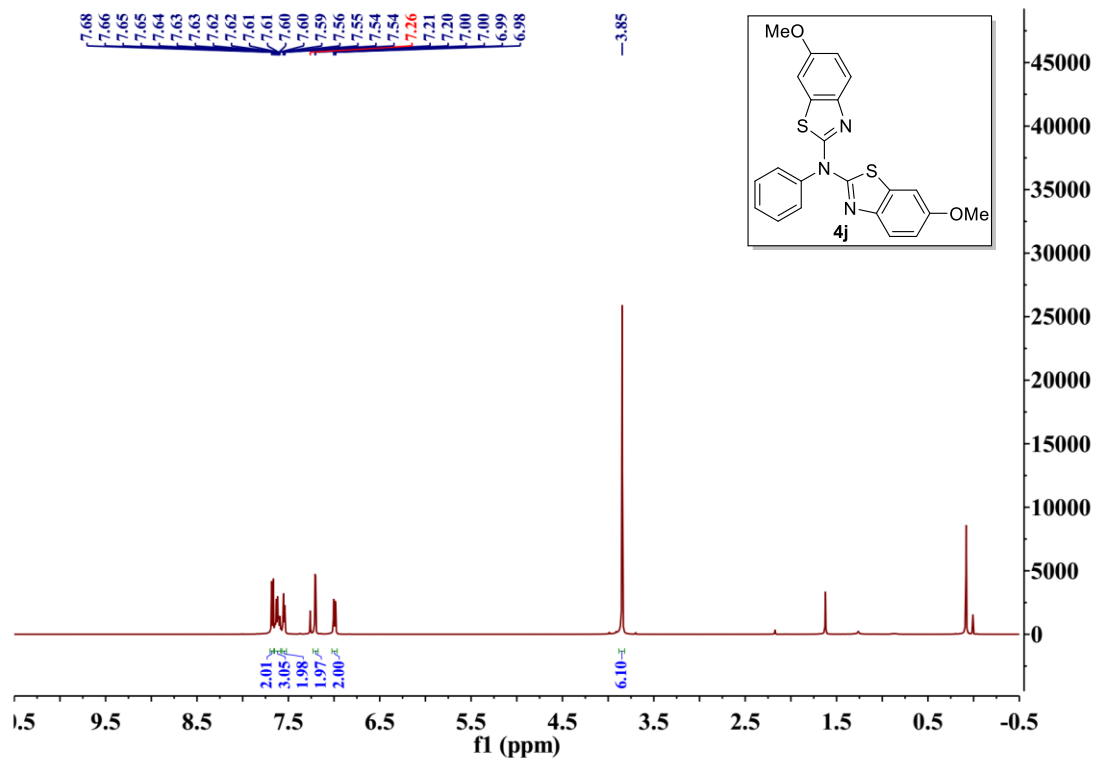

➤ <sup>13</sup>C NMR spectrum for **4j**

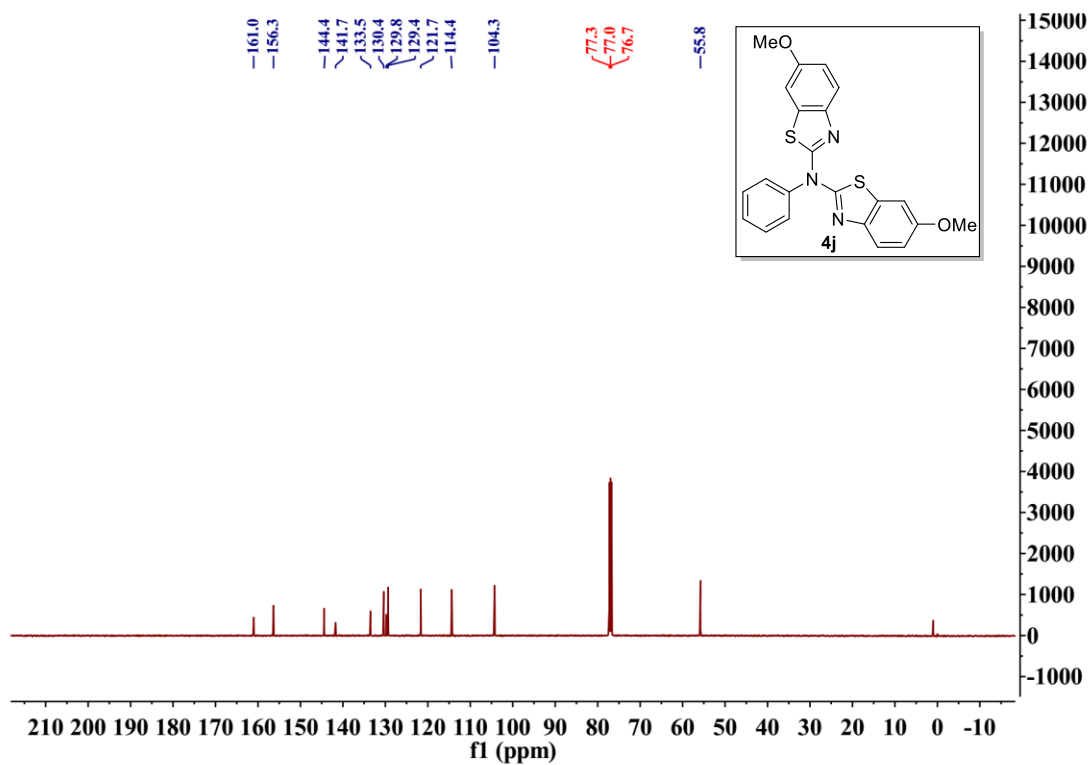

➤ HRMS spectrum for **4j**

W-C-157 #19 RT: 0.21 AV: 1 SB: 9 0.50-0.70 NL: 3.16E8  
T: FTMS + c APCI corona Full ms [60.0000-900.0000]

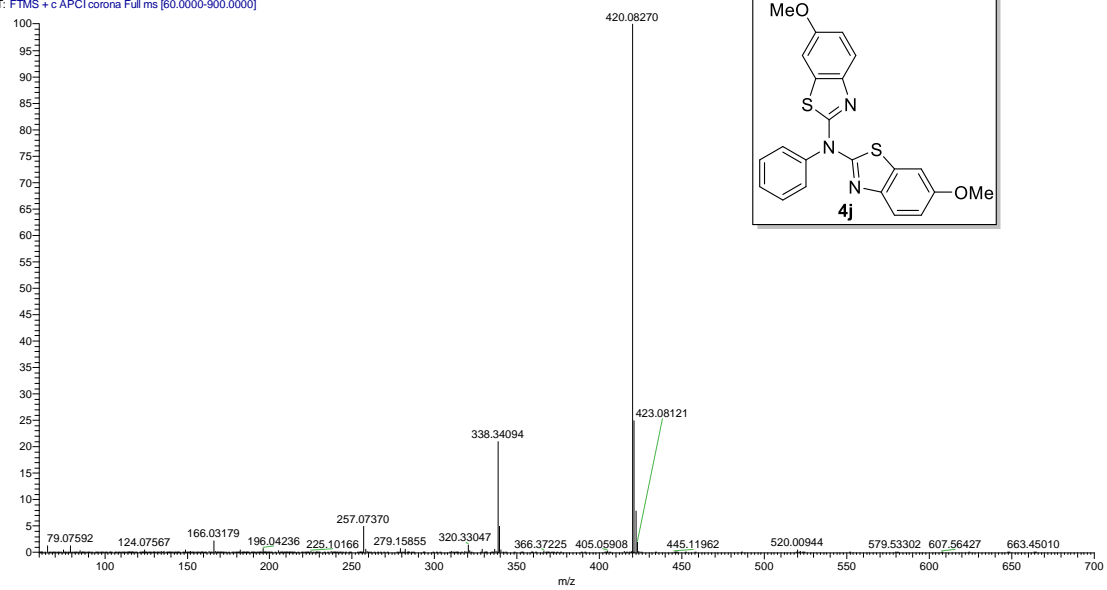

➤ <sup>1</sup>H NMR spectrum for **4k**

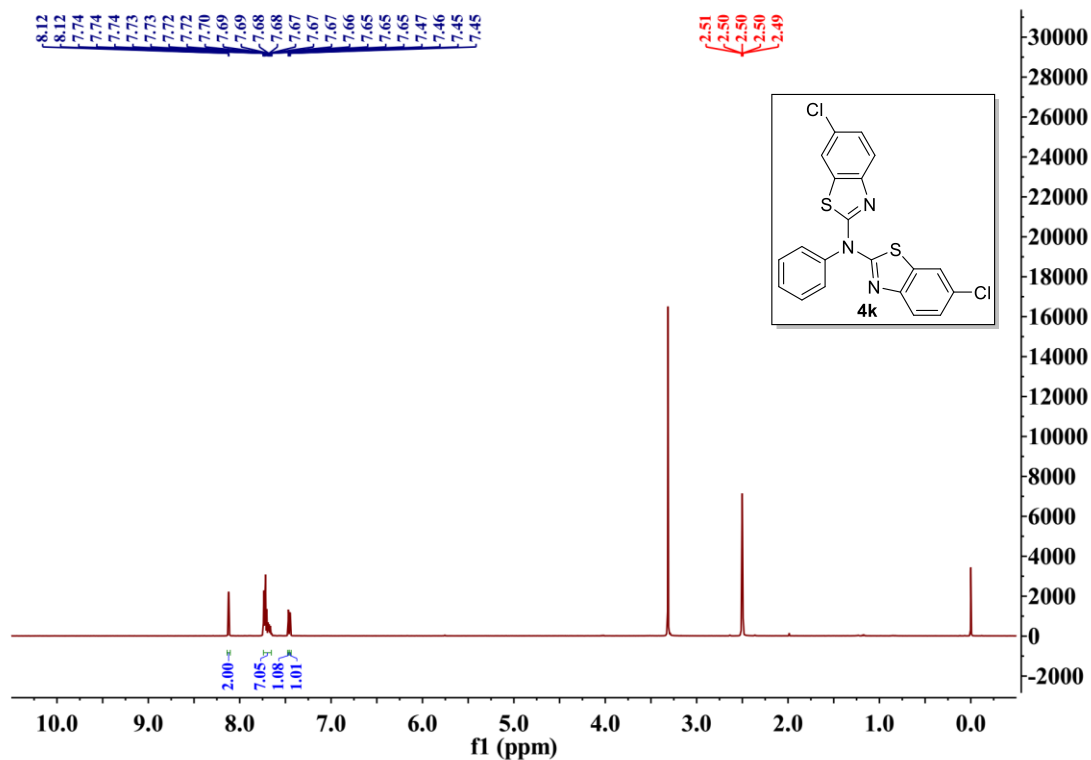

➤ <sup>13</sup>C NMR spectrum for **4k**

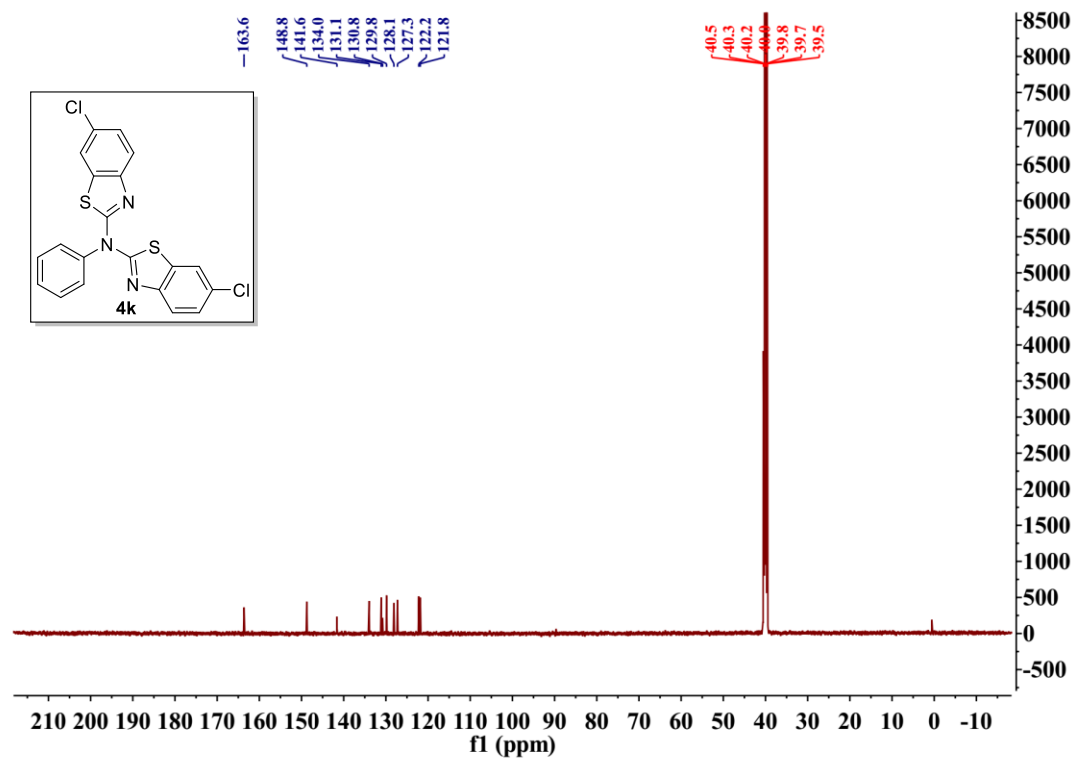

➤ HRMS spectrum for **4k**

W-C-159 #21 RT: 0.23 AV: 1 SB: 7 0.50-0.64 NL: 1.05E8  
T: FTMS + c APCI corona Full ms [60.0000-900.0000]

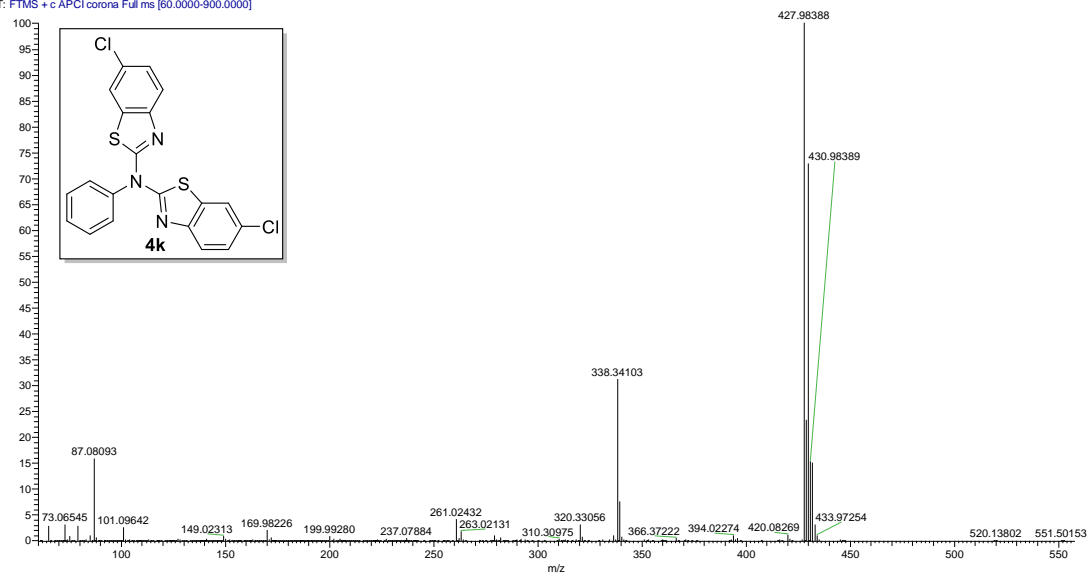

➤ <sup>1</sup>H NMR spectrum for **41**

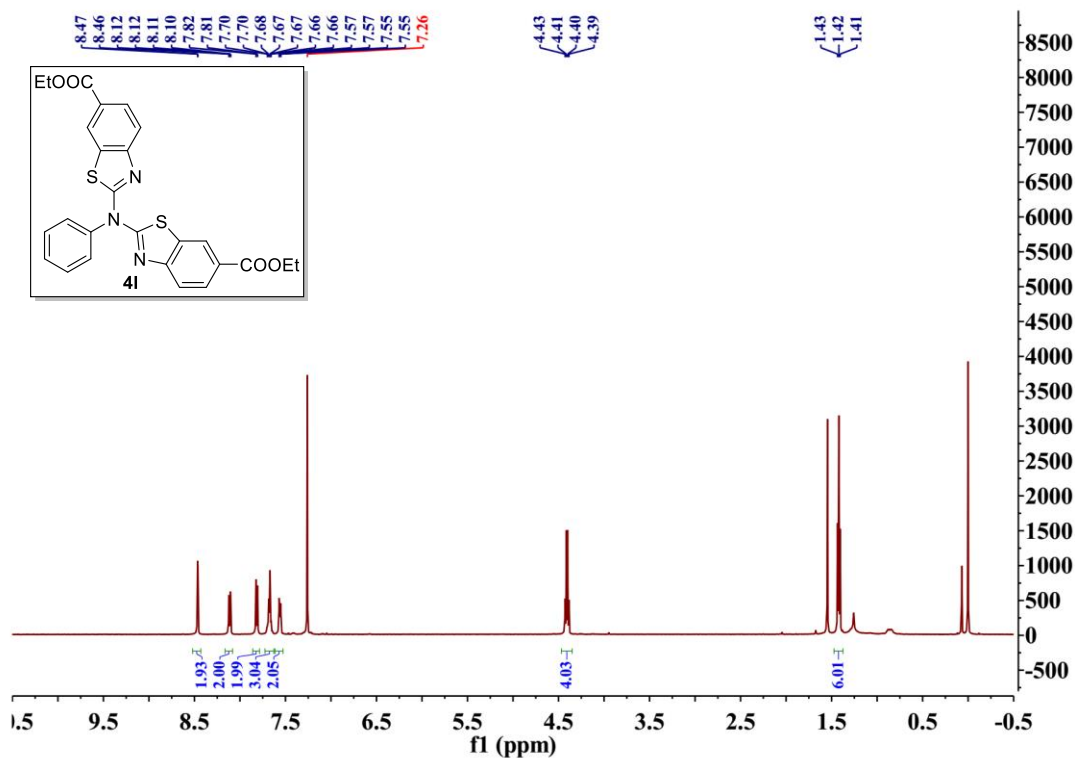

➤ <sup>13</sup>C NMR spectrum for **41**

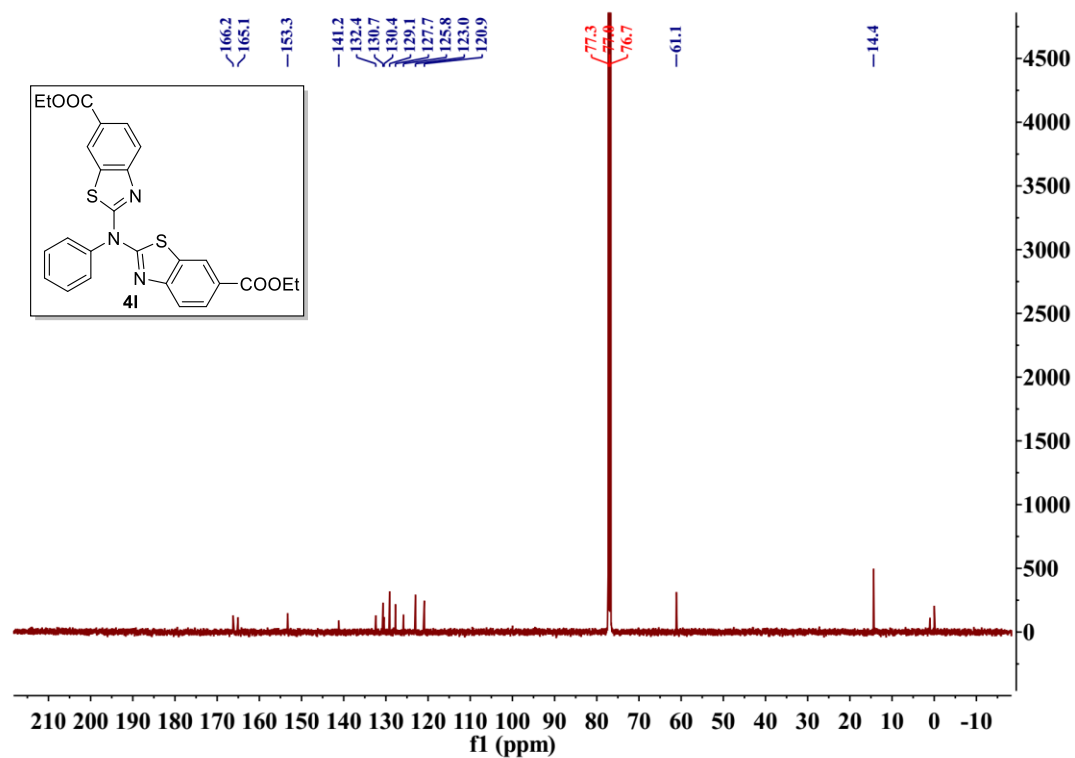

➤ HRMS spectrum for **41**

W-C-163 #21 RT: 0.23 AV: 1 SB: 8 0.40-0.58 NL: 2.24E8  
T: FTMS + c APCI corona Full ms [60.0000-900.0000]

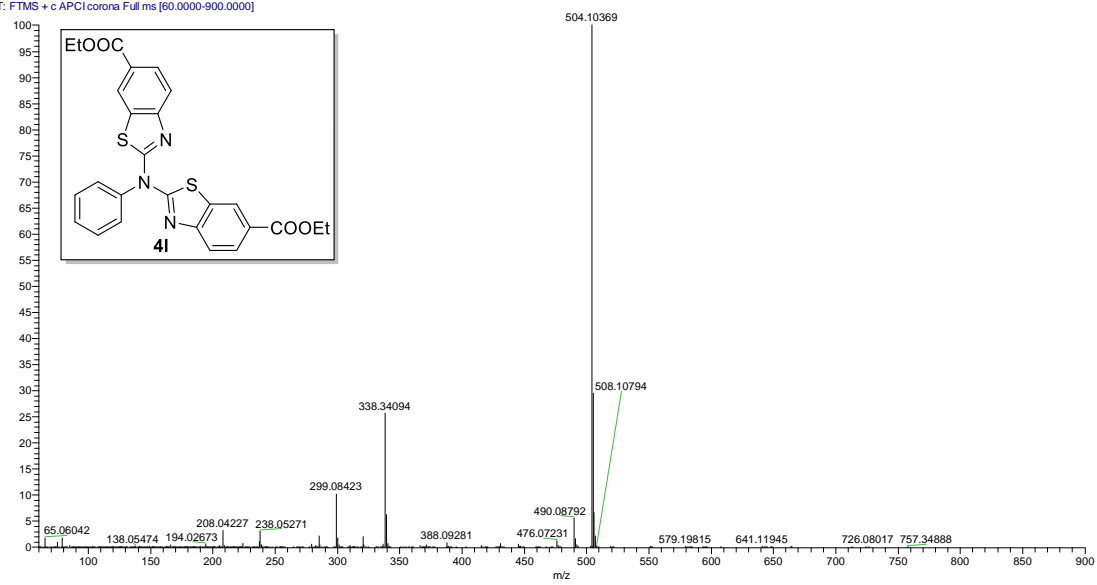

➤ <sup>1</sup>H NMR spectrum for **6a**

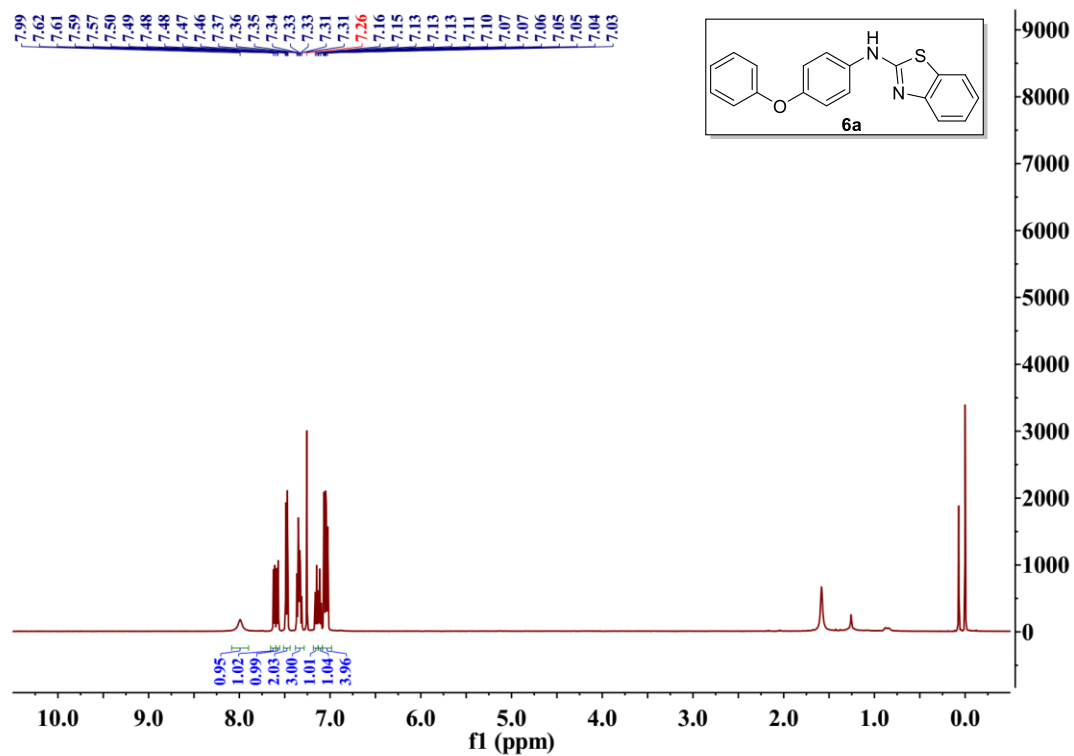

➤ <sup>13</sup>C NMR spectrum for **6a**

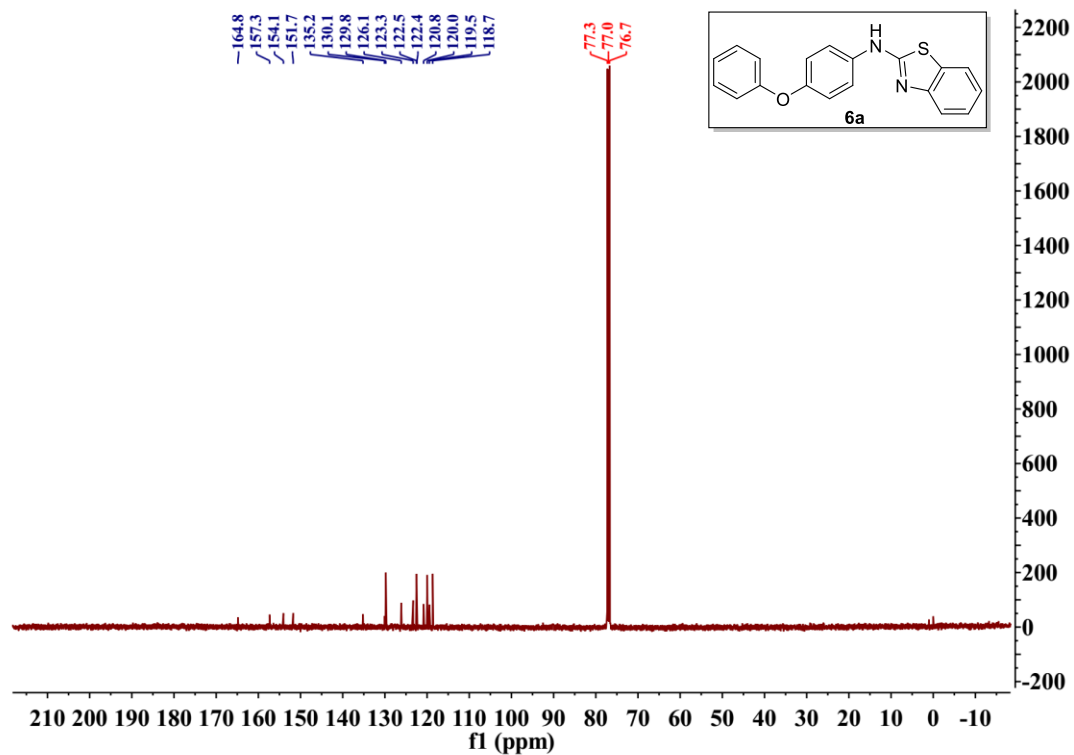



➤ HRMS spectrum for **6a**

Generic Display Report (all)

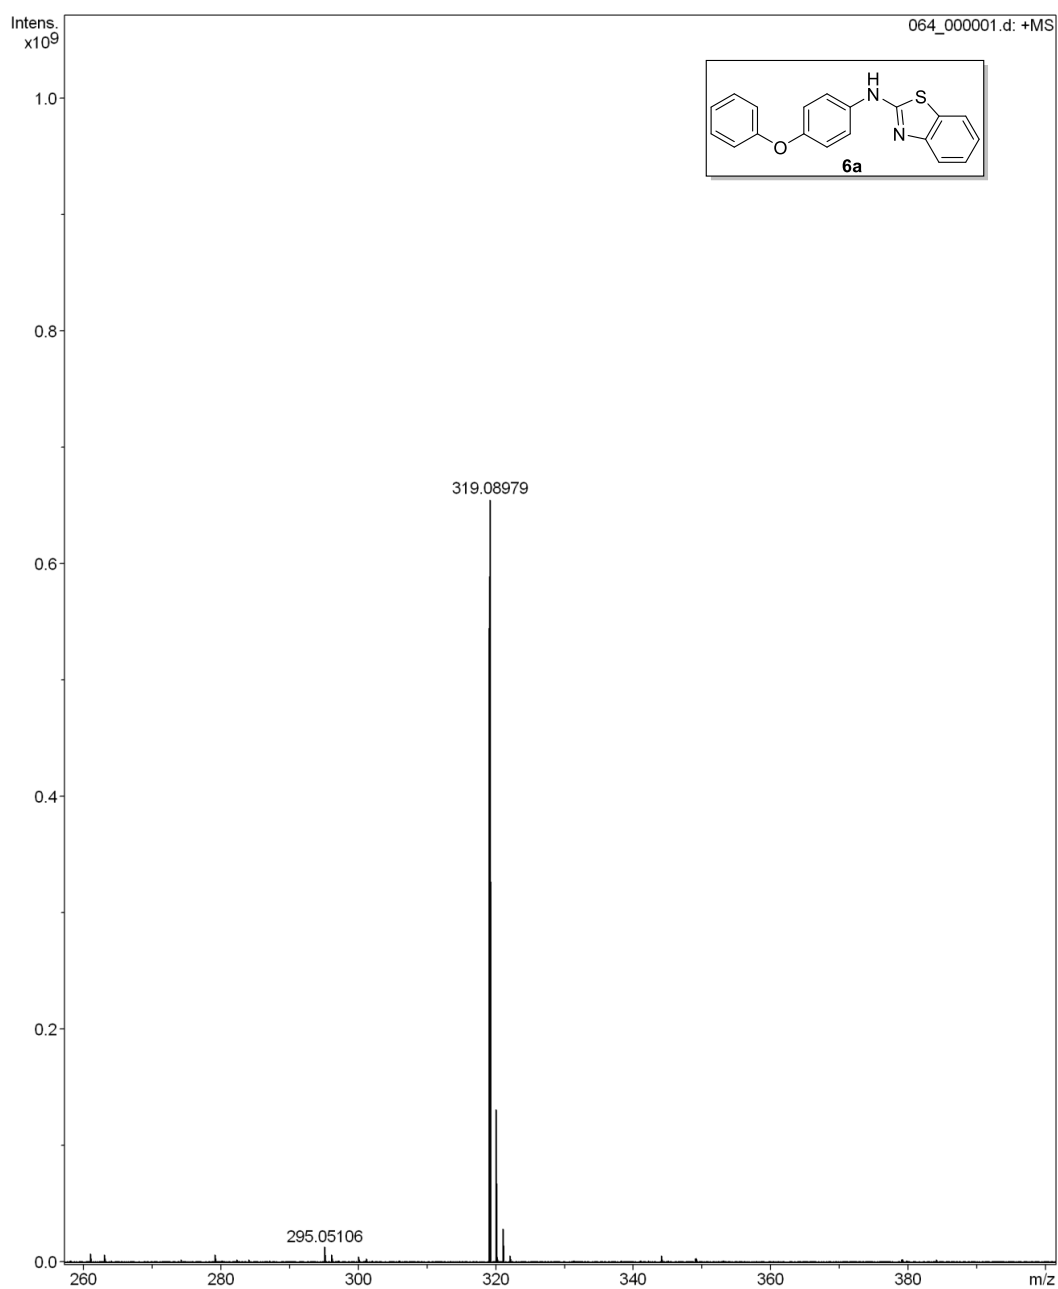

➤ <sup>1</sup>H NMR spectrum for **6b**

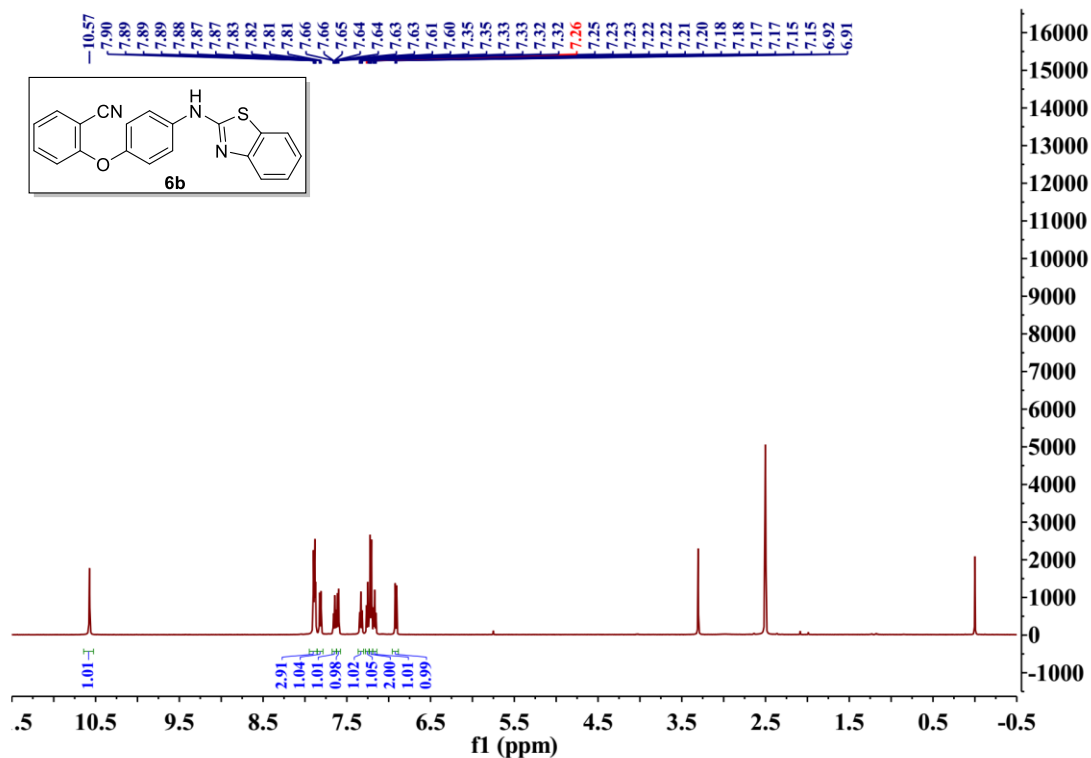

➤ <sup>13</sup>C NMR spectrum for **6b**

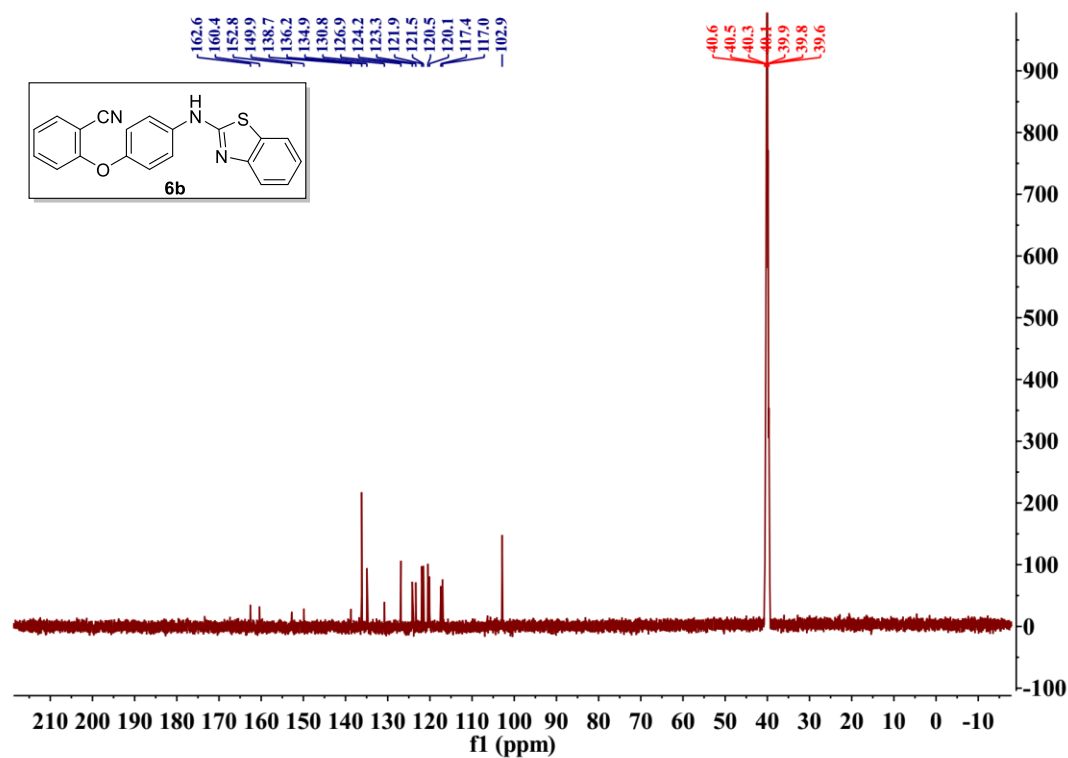

➤ HRMS spectrum for **6b**

Generic Display Report (all)

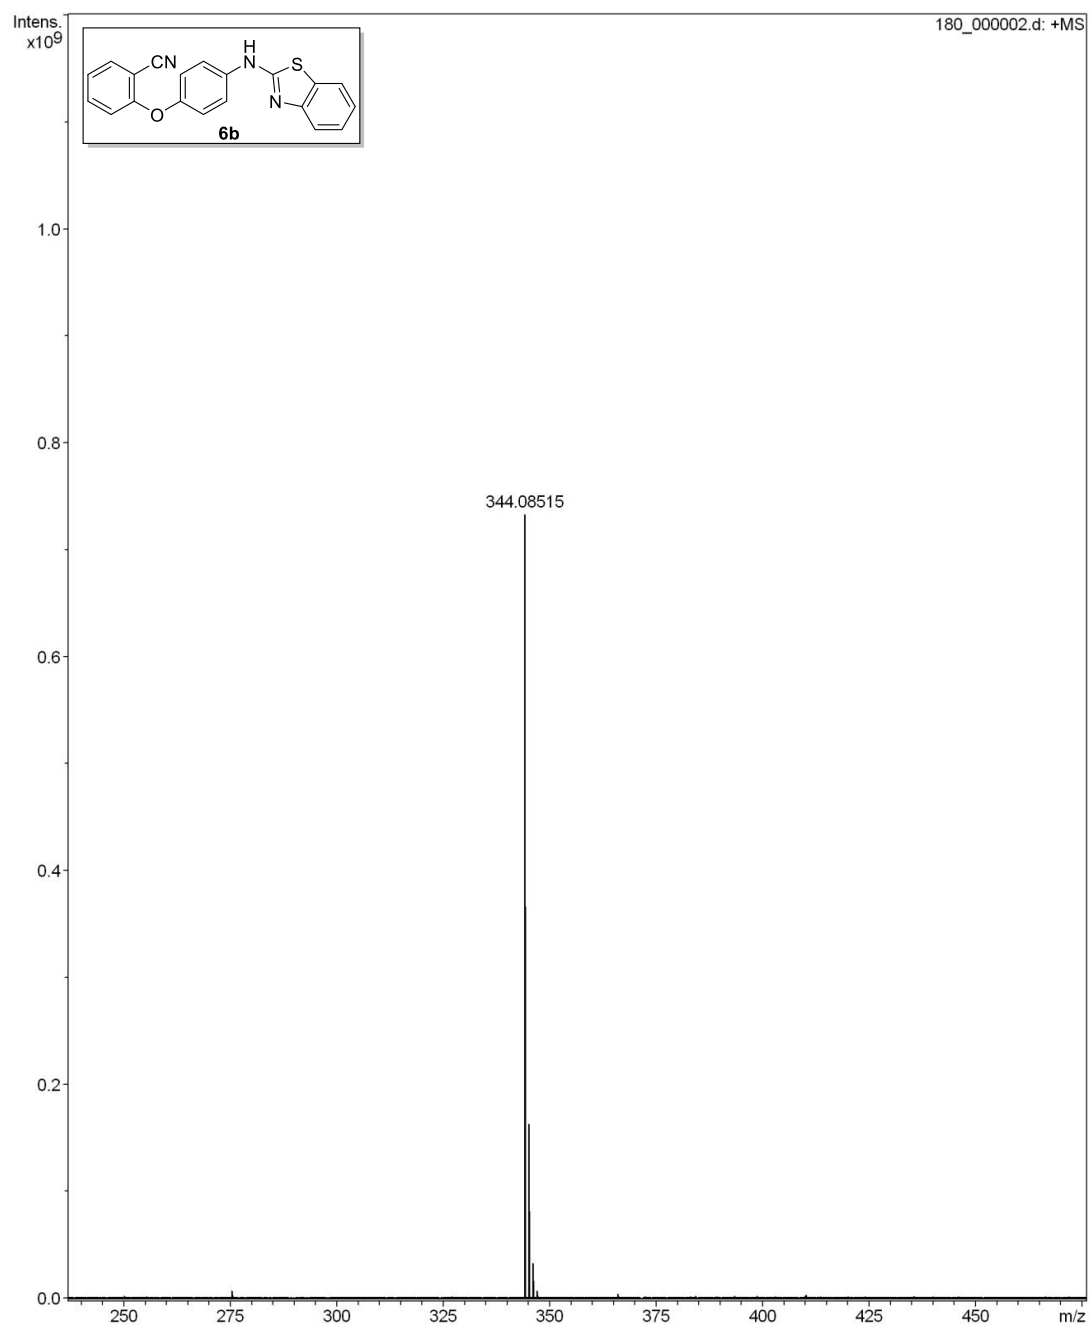

➤ <sup>1</sup>H NMR spectrum for **6c**

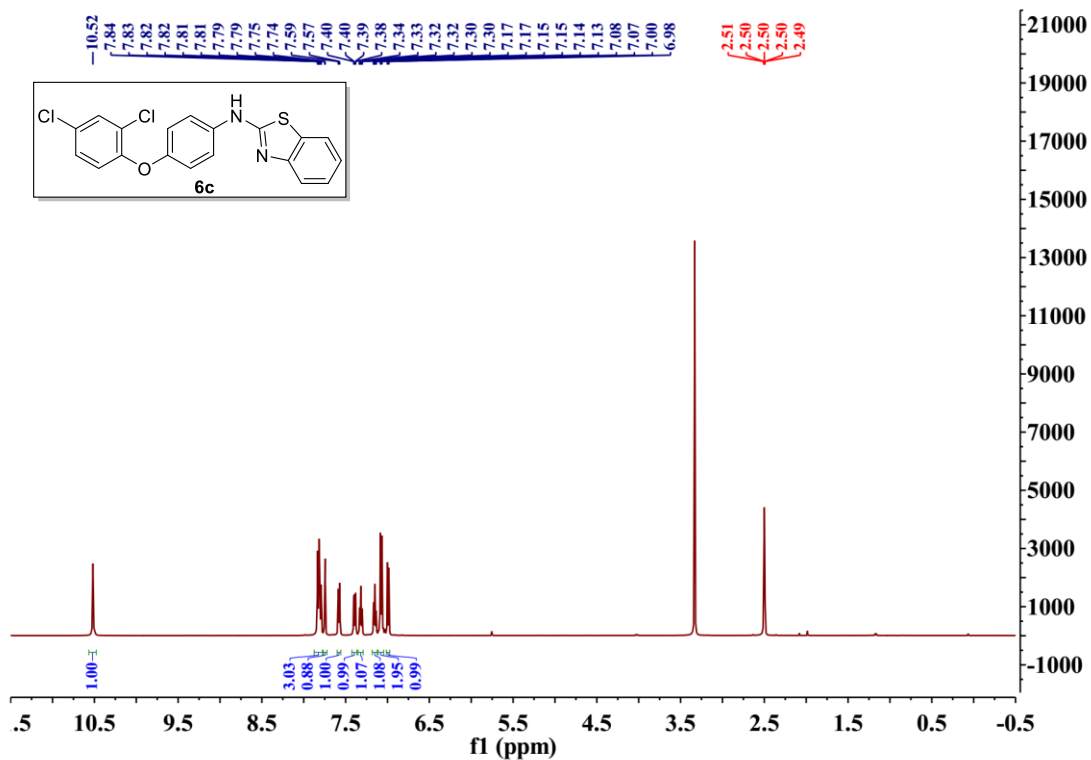

➤ <sup>13</sup>C NMR spectrum for **6c**

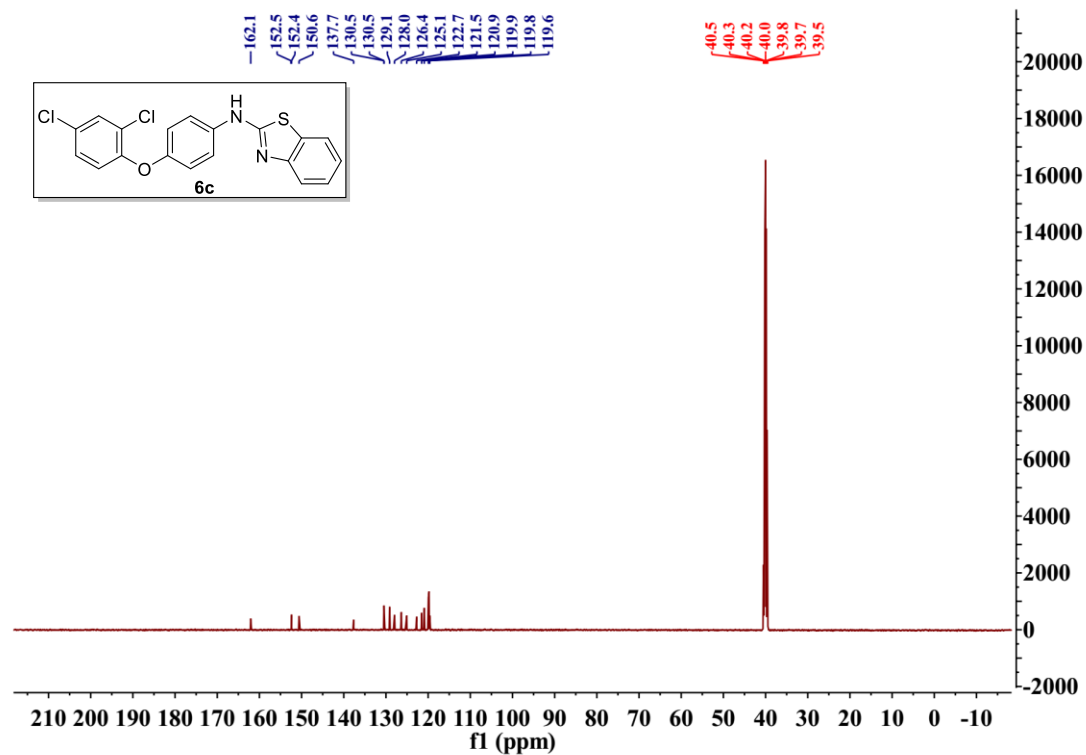

➤ HRMS spectrum for **6c**

Generic Display Report (all)

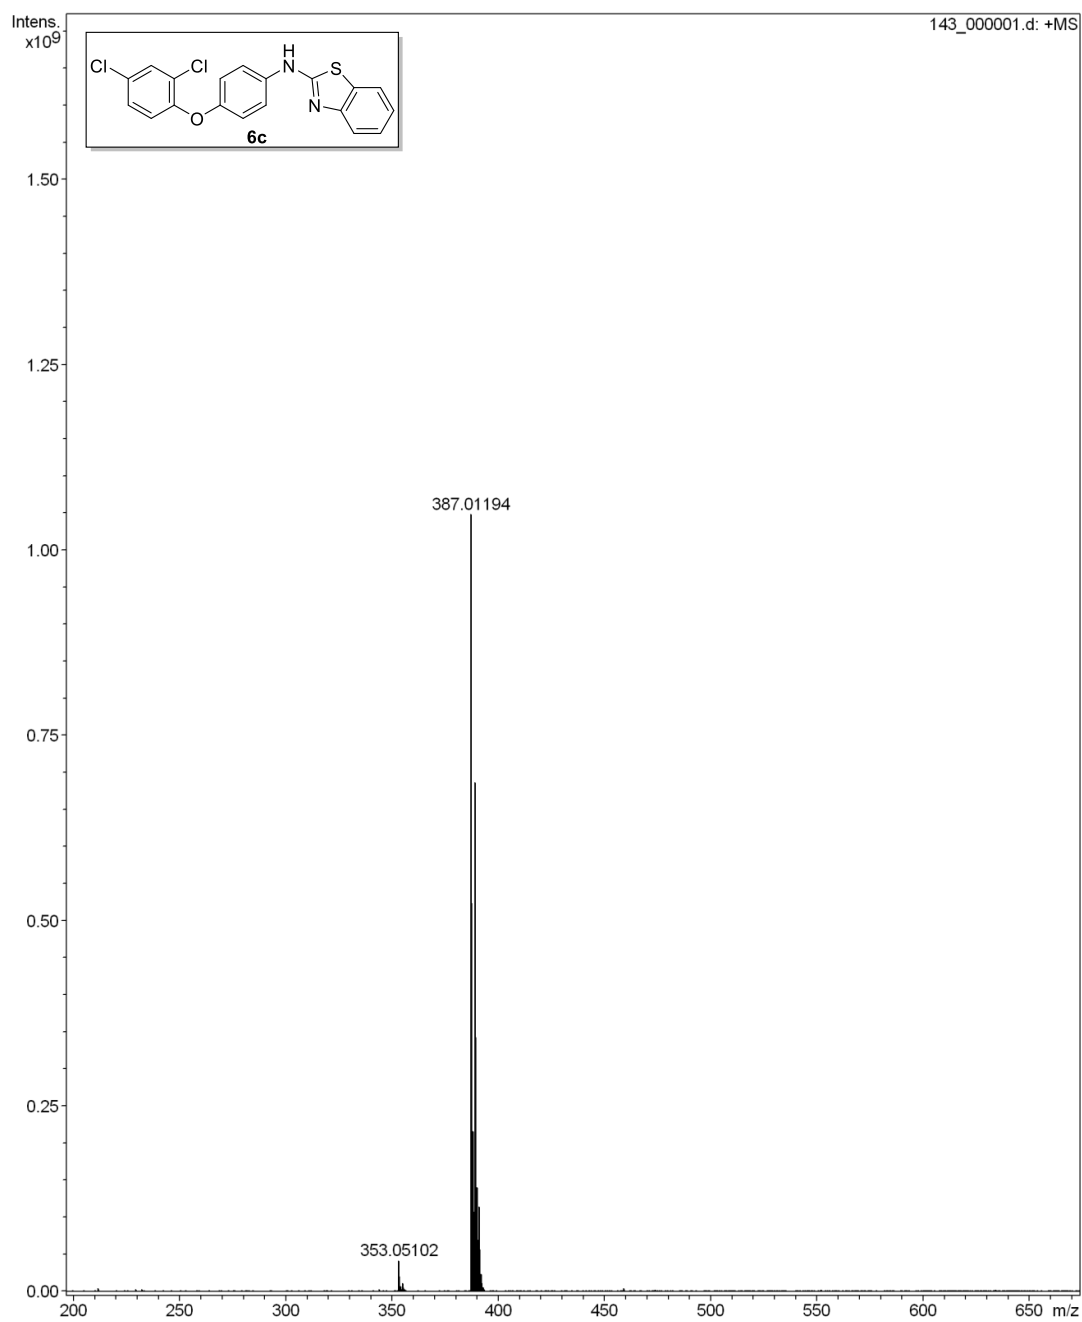

➤ <sup>1</sup>H NMR spectrum for **6d**

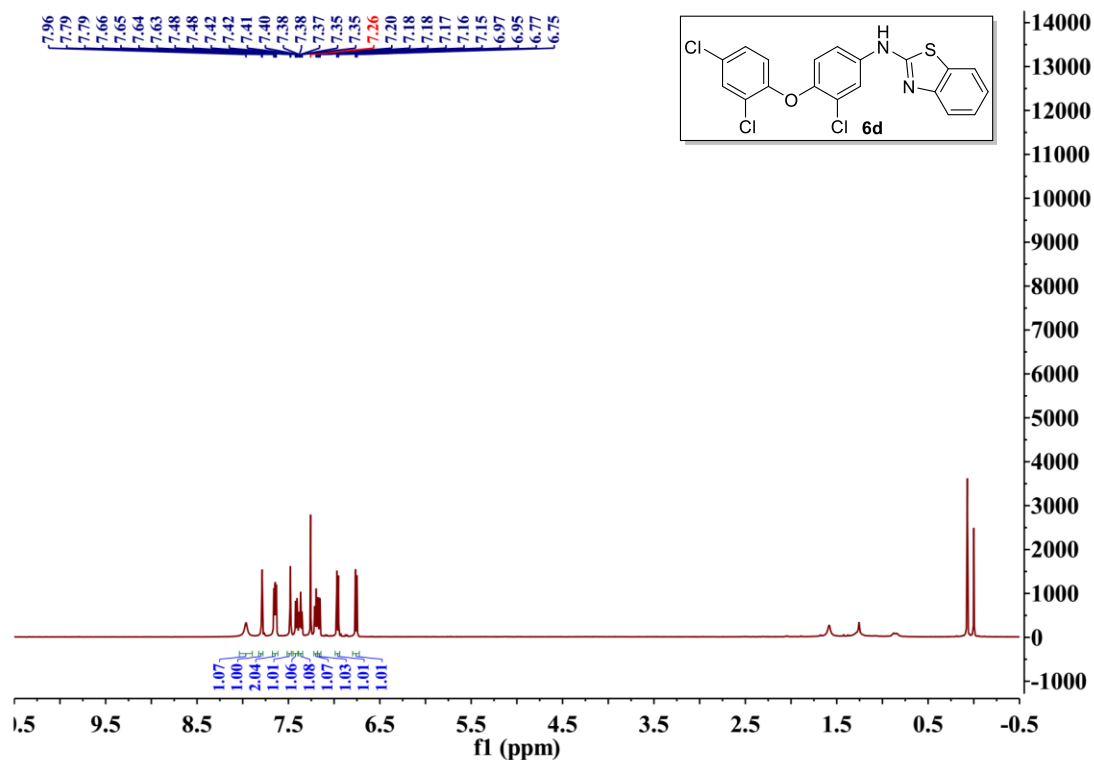

➤ <sup>13</sup>C NMR spectrum for **6d**

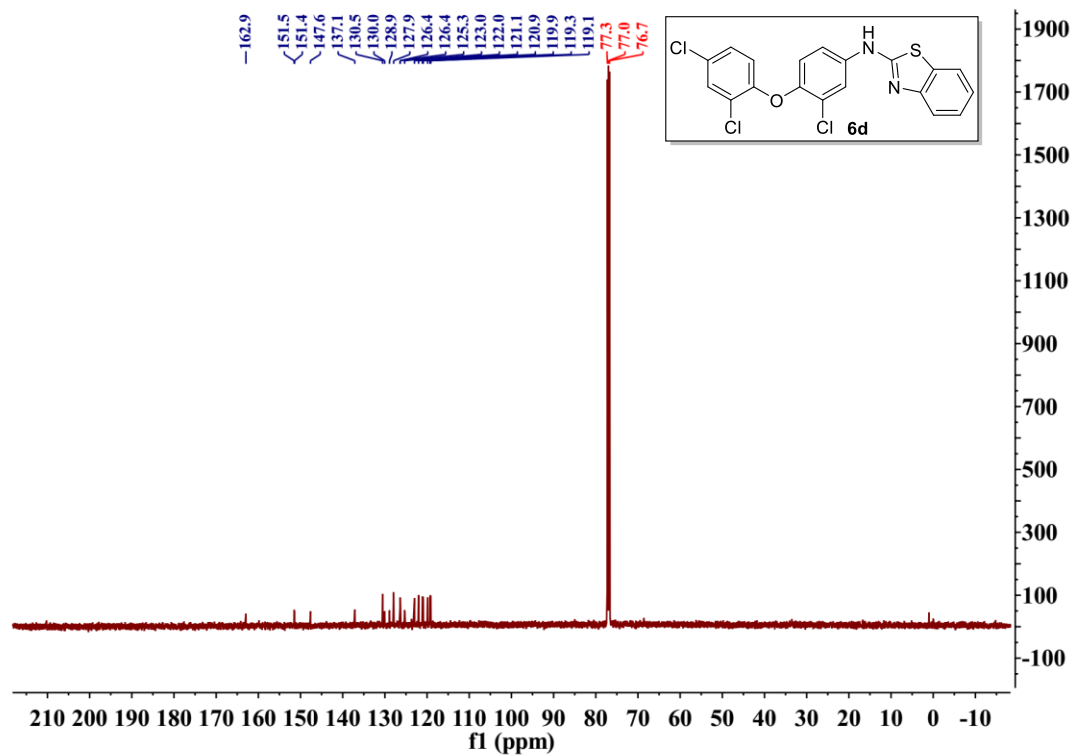

➤ HRMS spectrum for **6d**

Generic Display Report (all)

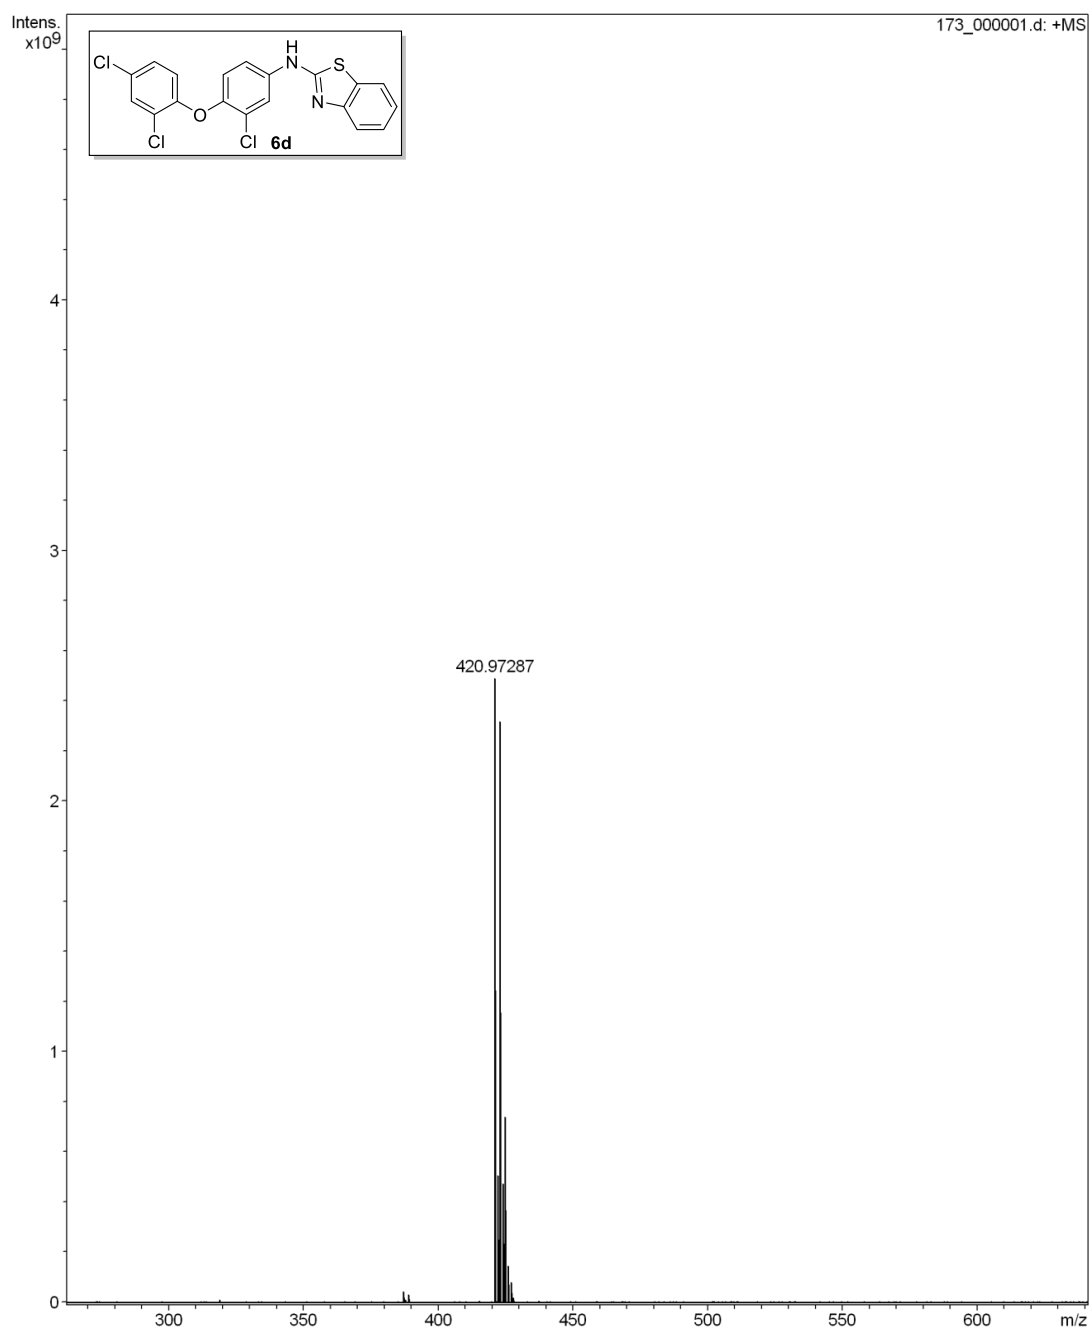

➤ <sup>1</sup>H NMR spectrum for **6e**

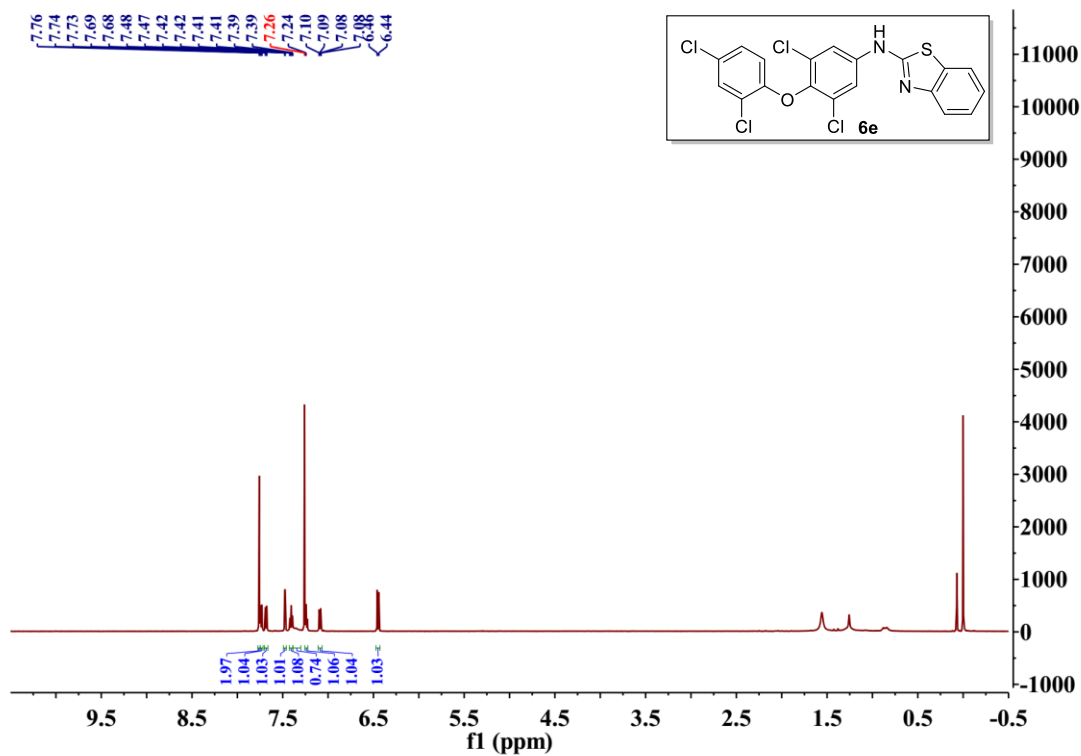

➤ <sup>13</sup>C NMR spectrum for **6e**

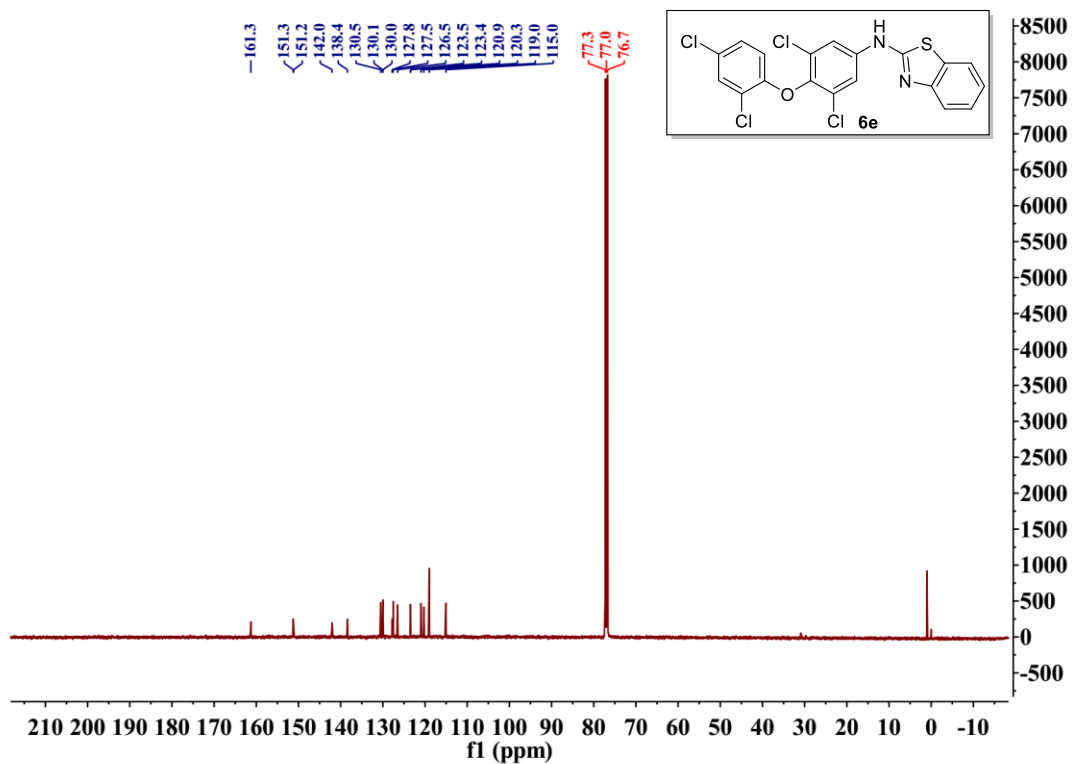



➤ HRMS spectrum for **6e**

Generic Display Report (all)

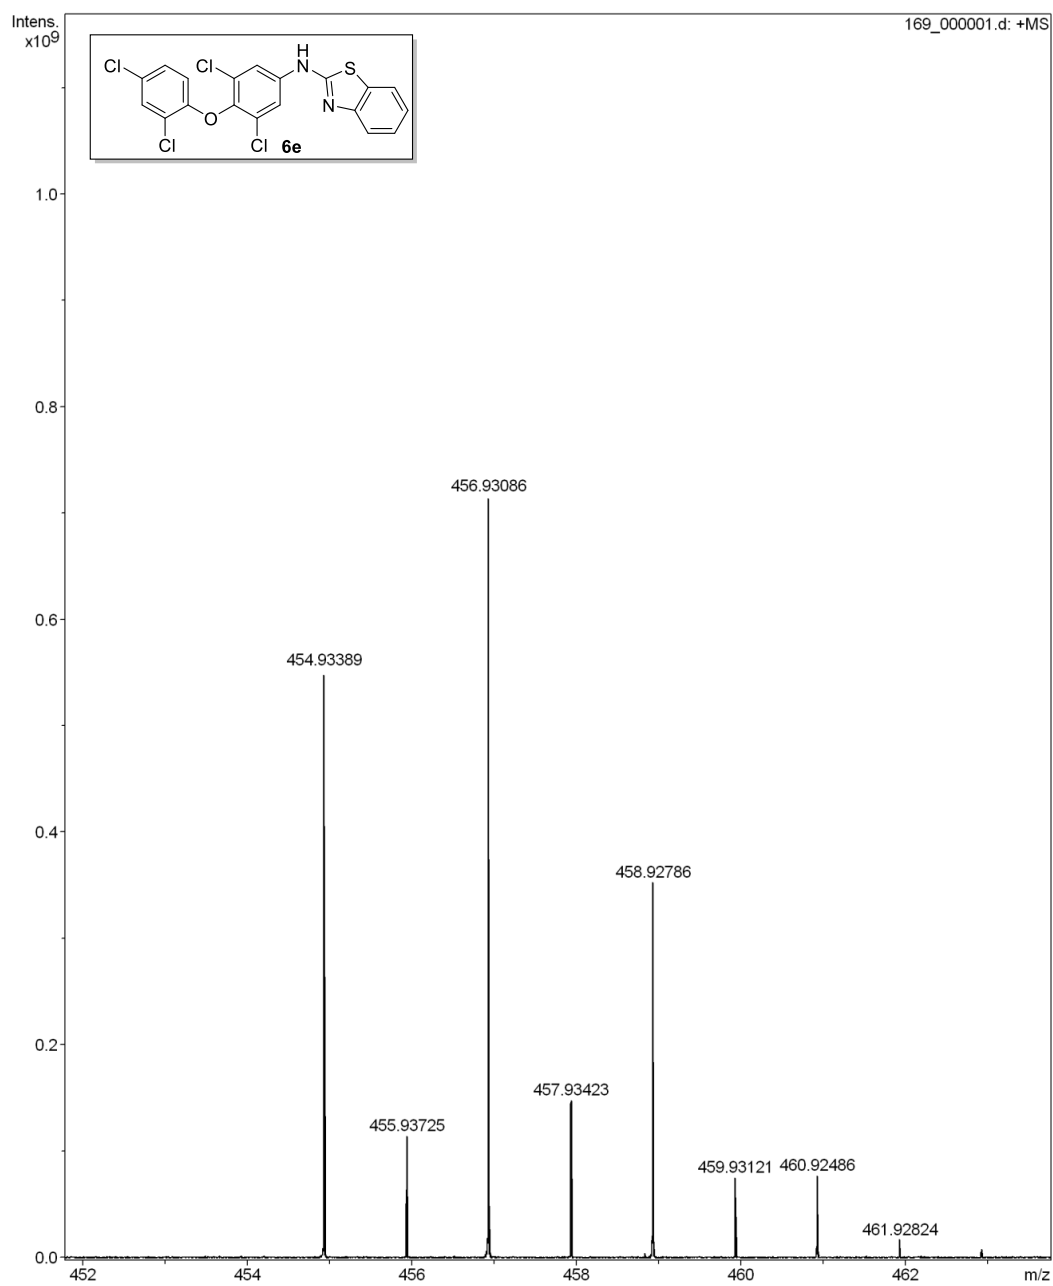

➤ <sup>1</sup>H NMR spectrum for **6f**

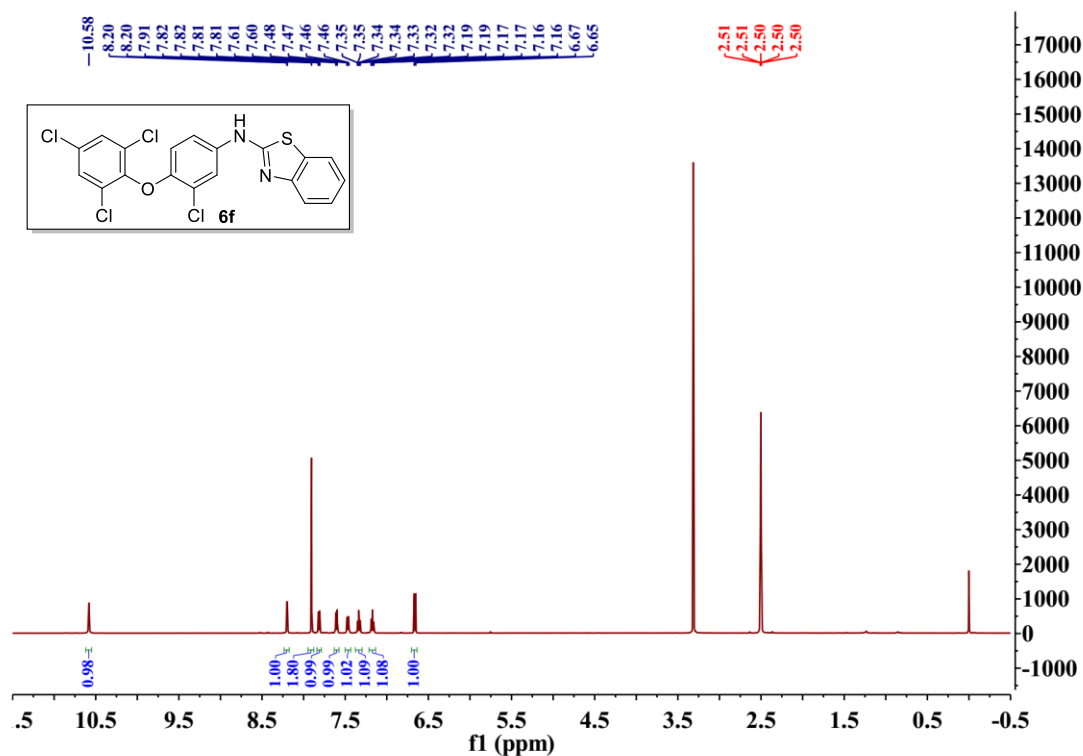

➤ <sup>13</sup>C NMR spectrum for **6f**

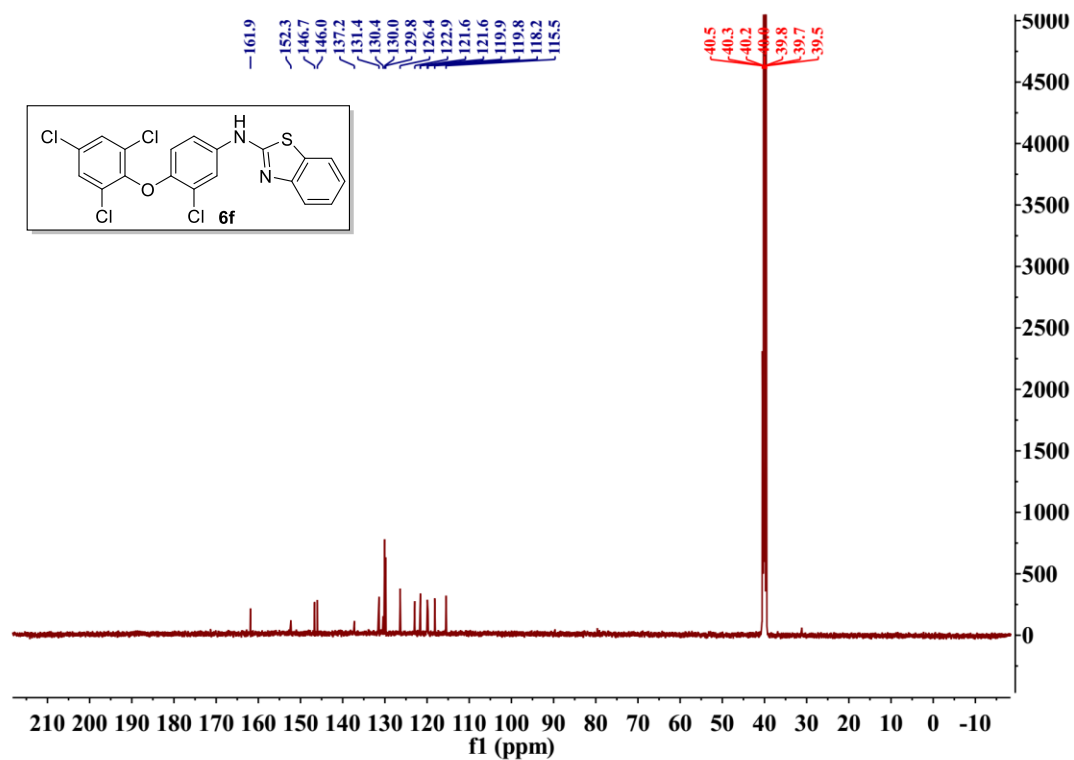

➤ HRMS spectrum for **6f**

Generic Display Report (all)

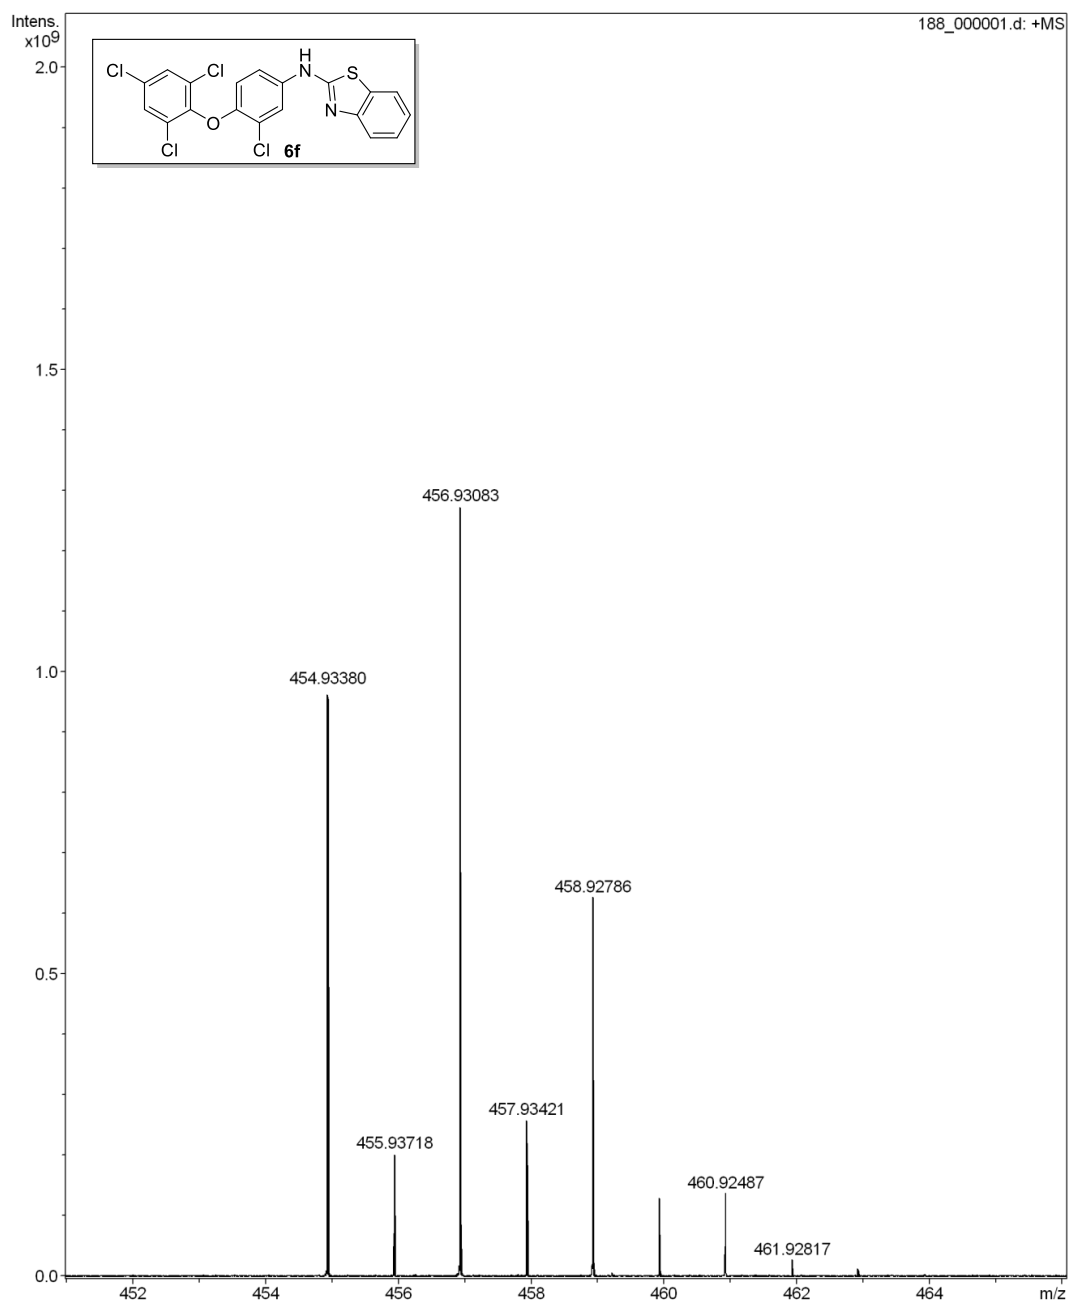

➤ <sup>1</sup>H NMR spectrum for **6g**

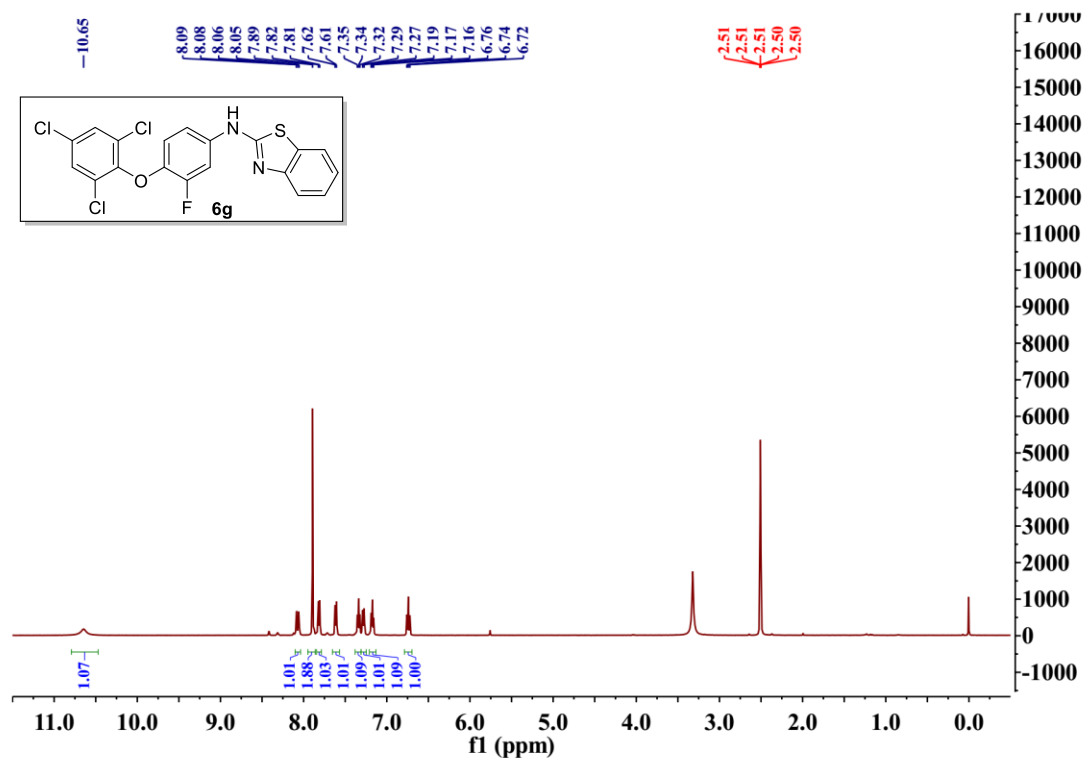

➤ <sup>13</sup>C NMR spectrum for **6g**

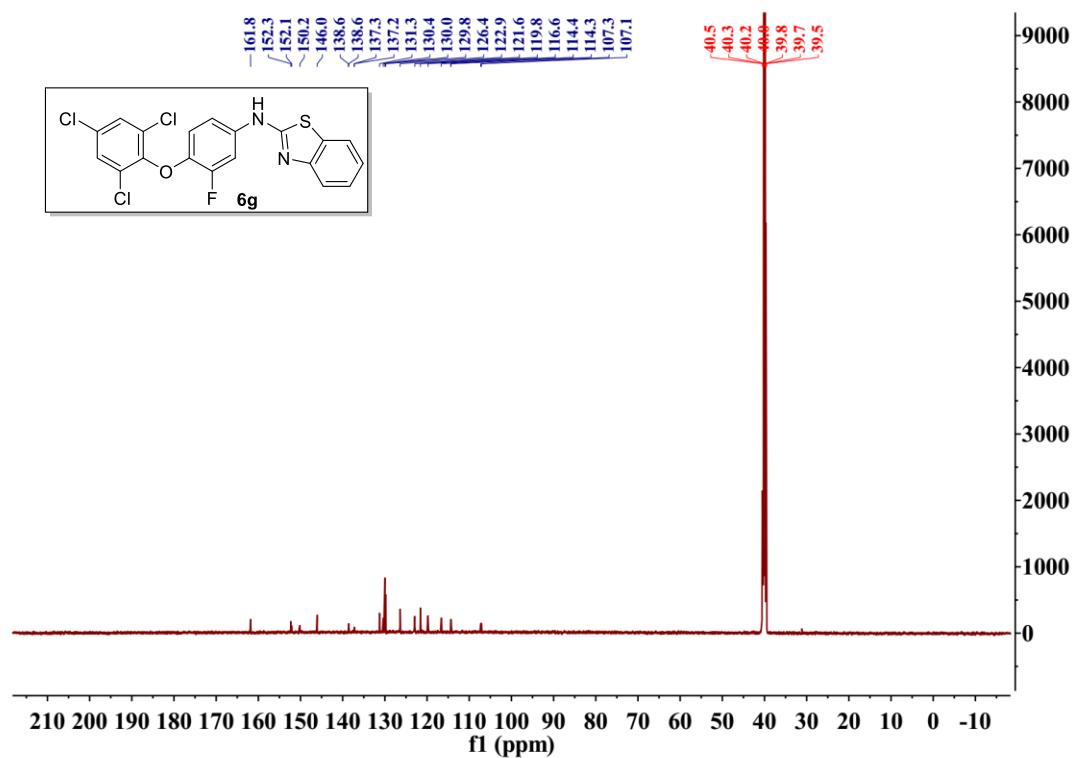

➤ HRMS spectrum for **6g**

Generic Display Report (all)

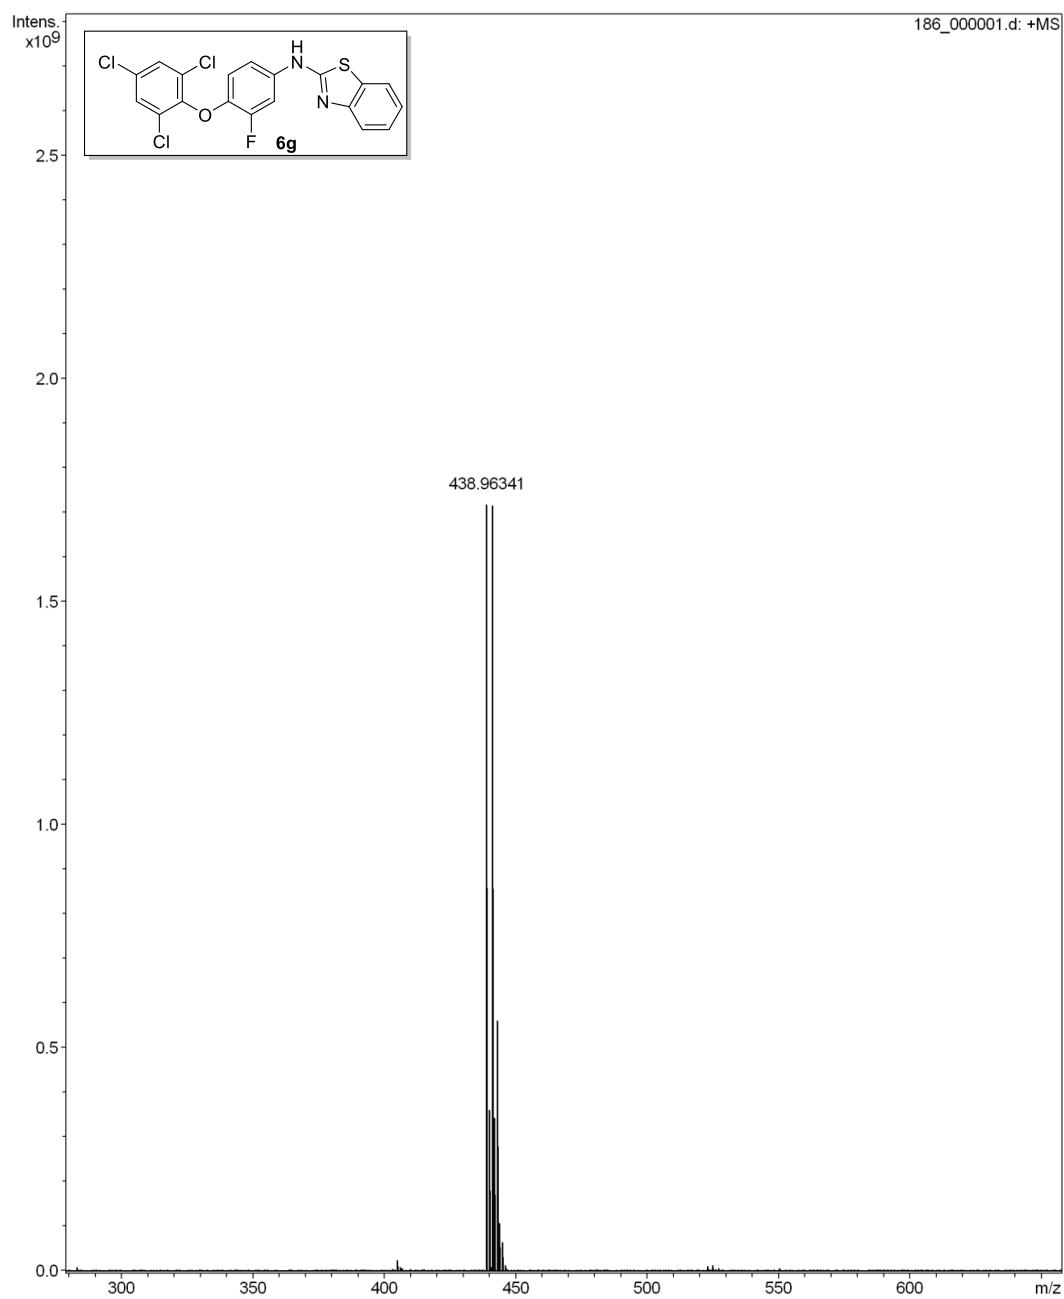

➤ <sup>1</sup>H NMR spectrum for **6h**

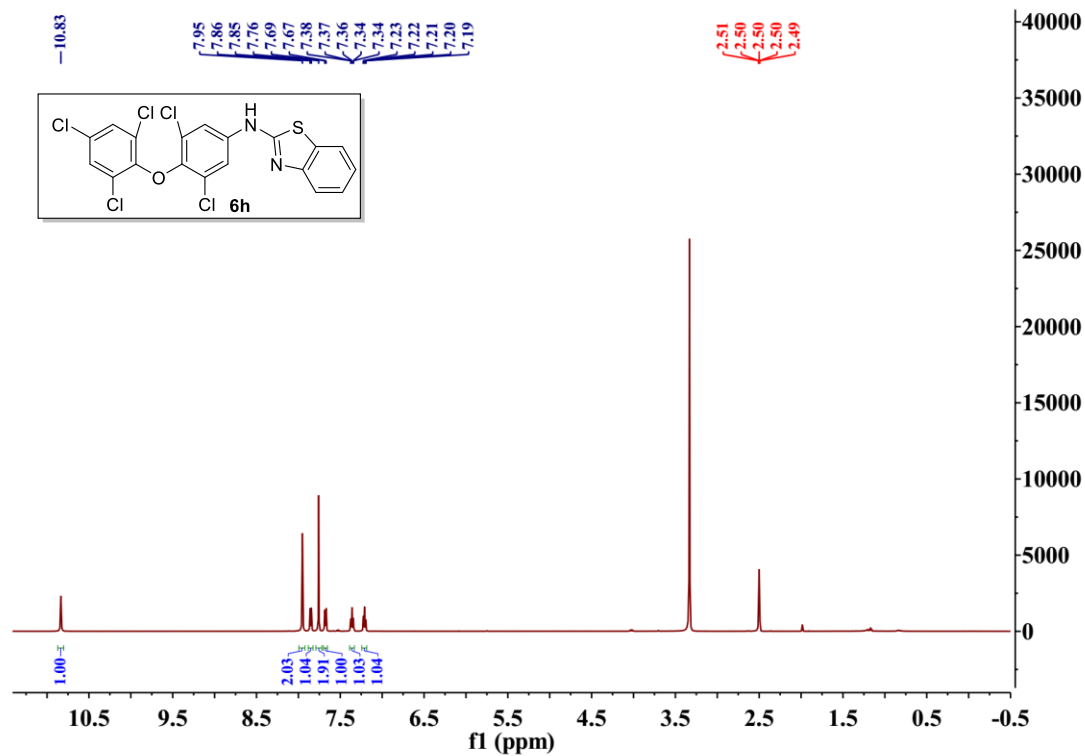

➤ <sup>13</sup>C NMR spectrum for **6h**

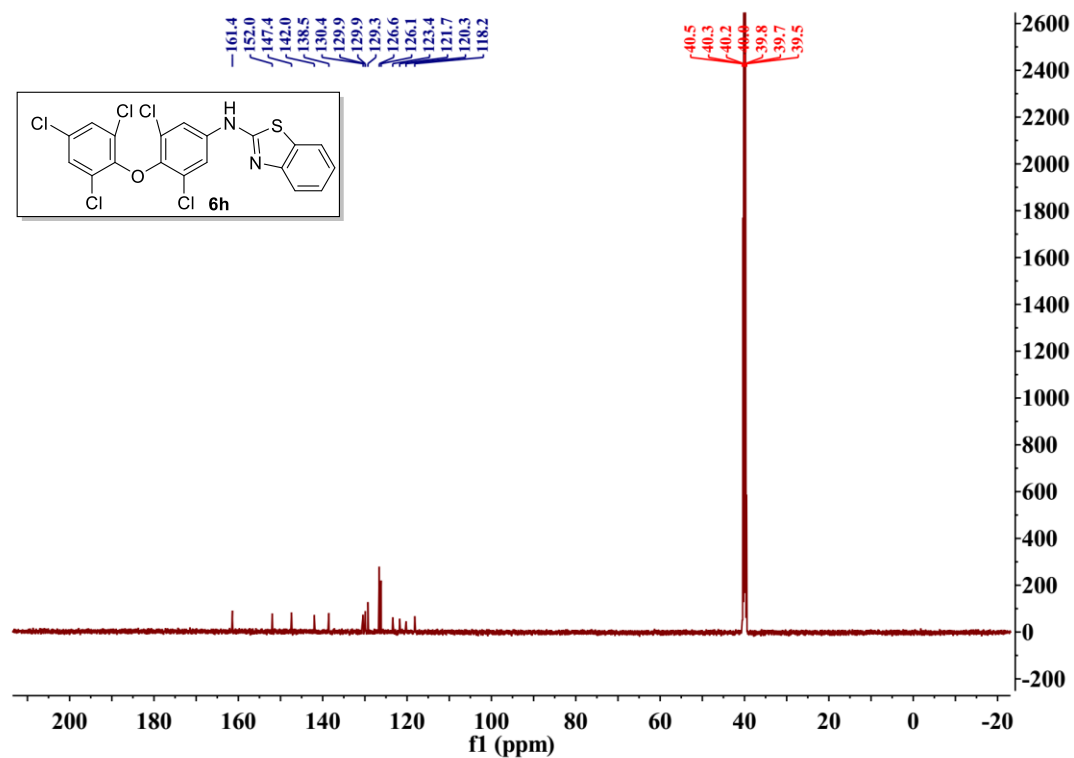

➤ HRMS spectrum for **6h**

Generic Display Report (all)

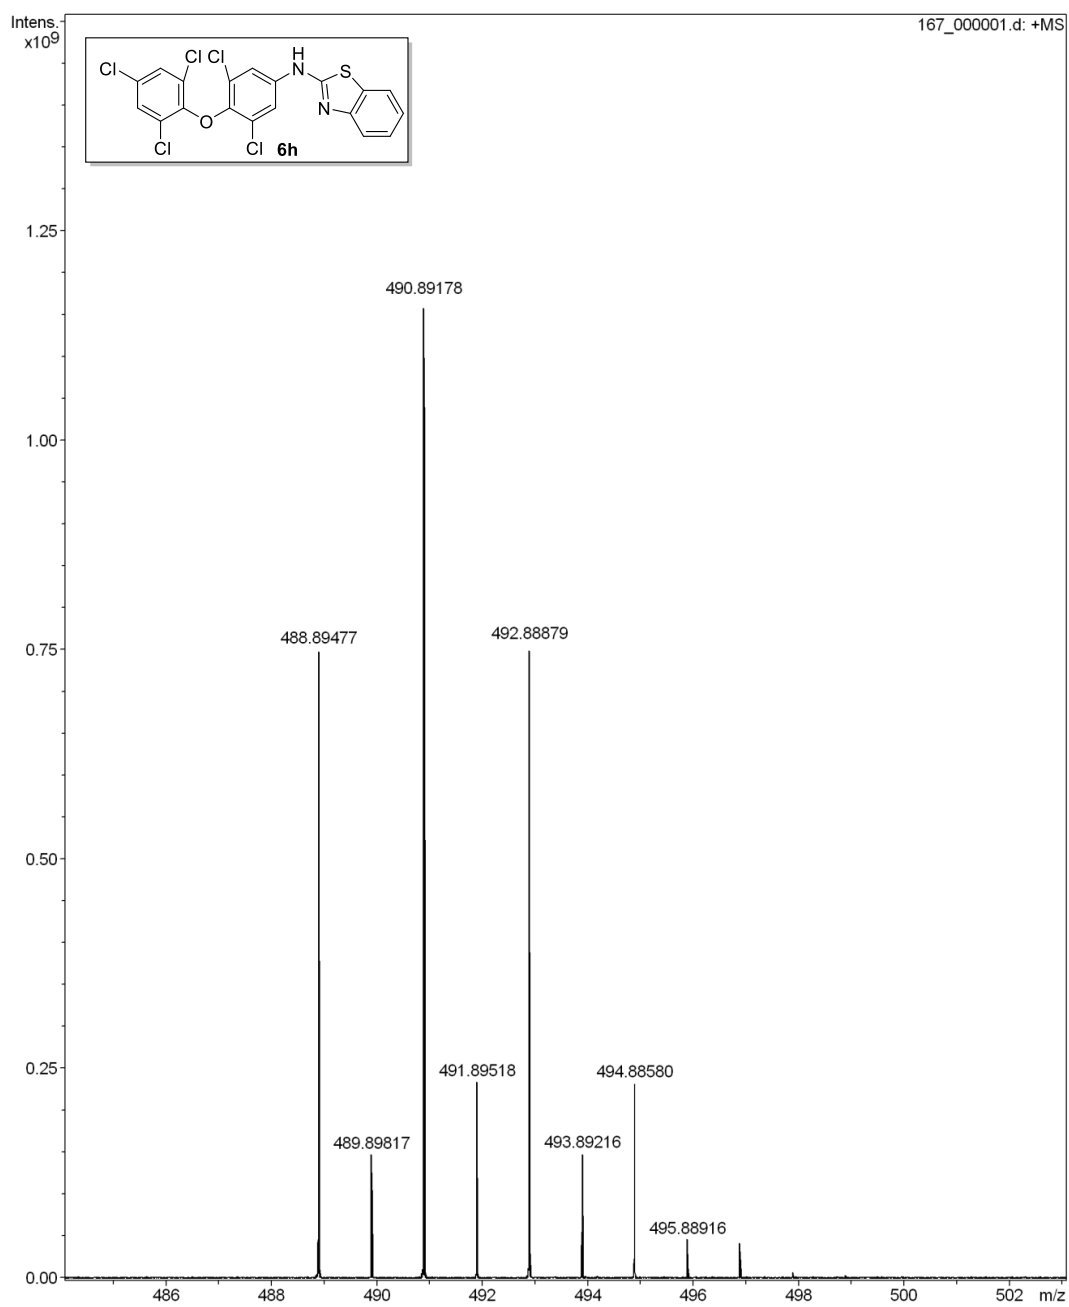

➤ <sup>1</sup>H NMR spectrum for **6i**

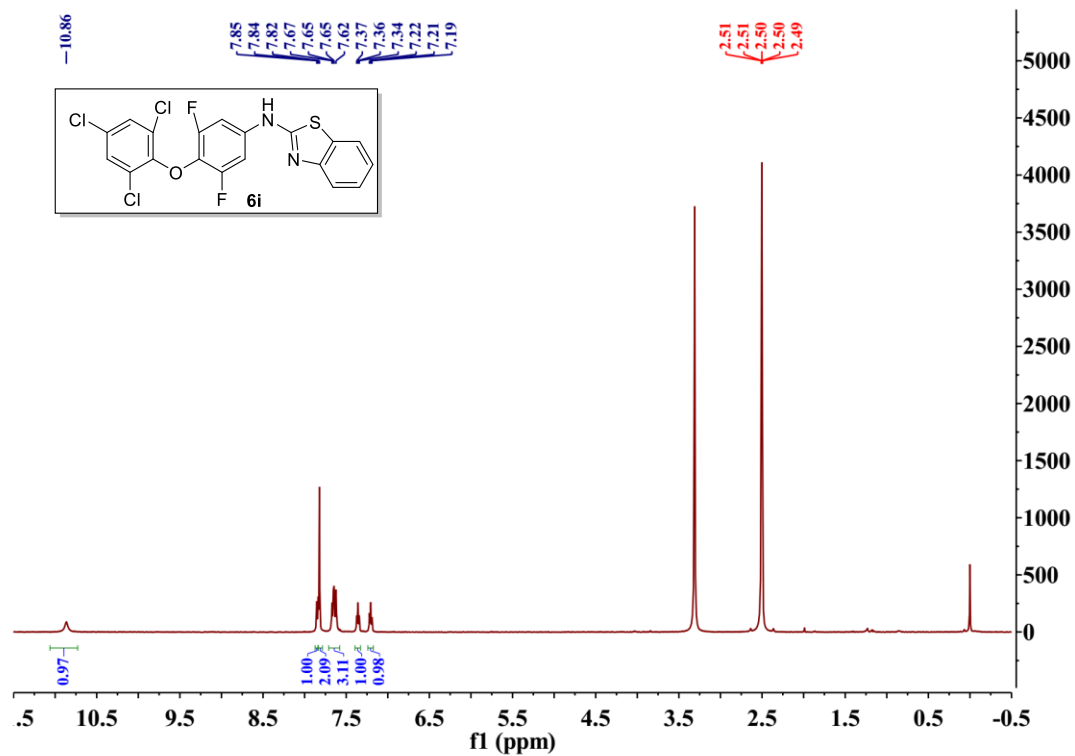

➤ <sup>13</sup>C NMR spectrum for **6i**

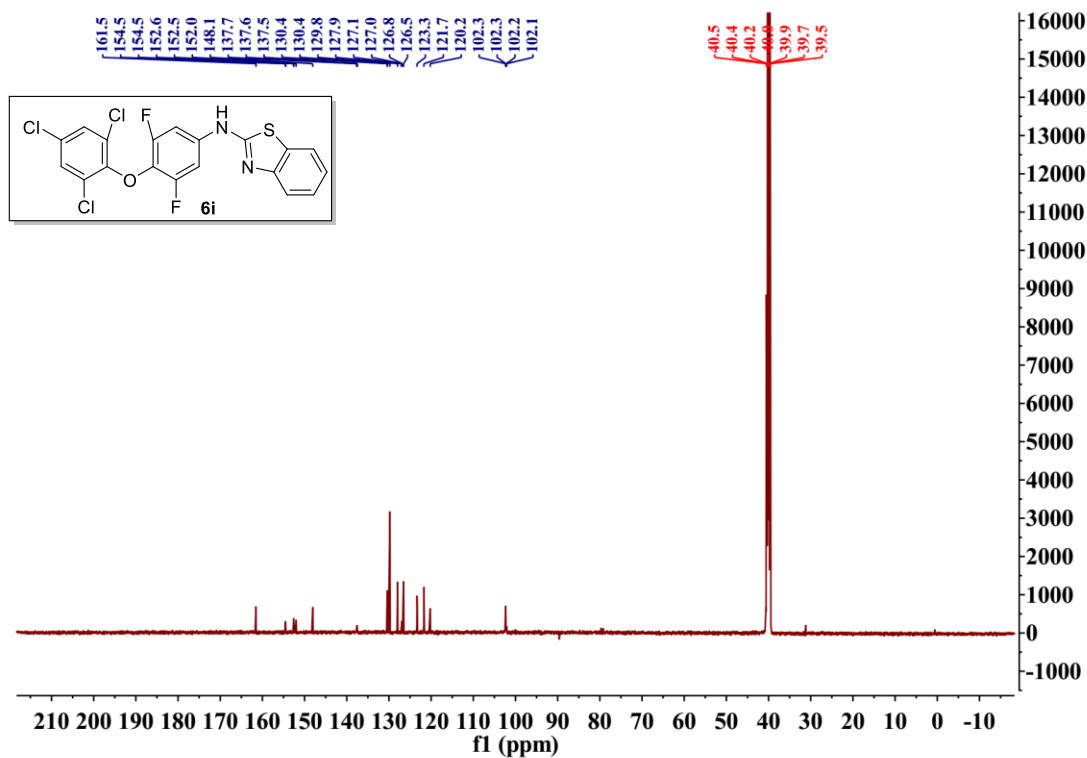



➤ HRMS spectrum for **6i**

Generic Display Report (all)

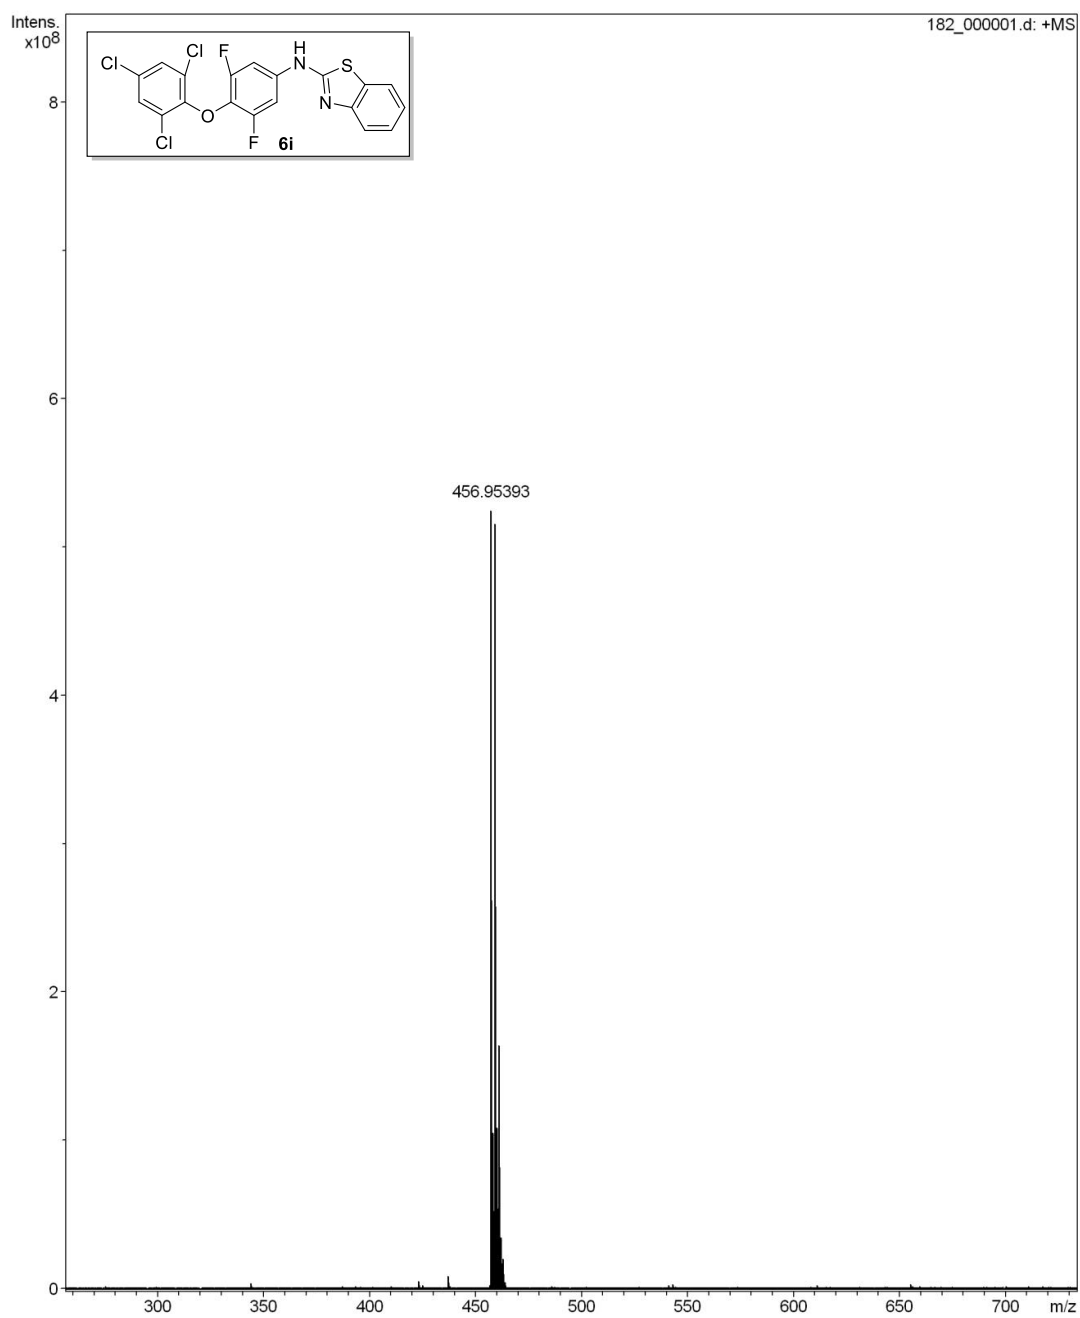

➤ <sup>1</sup>H NMR spectrum for **6j**

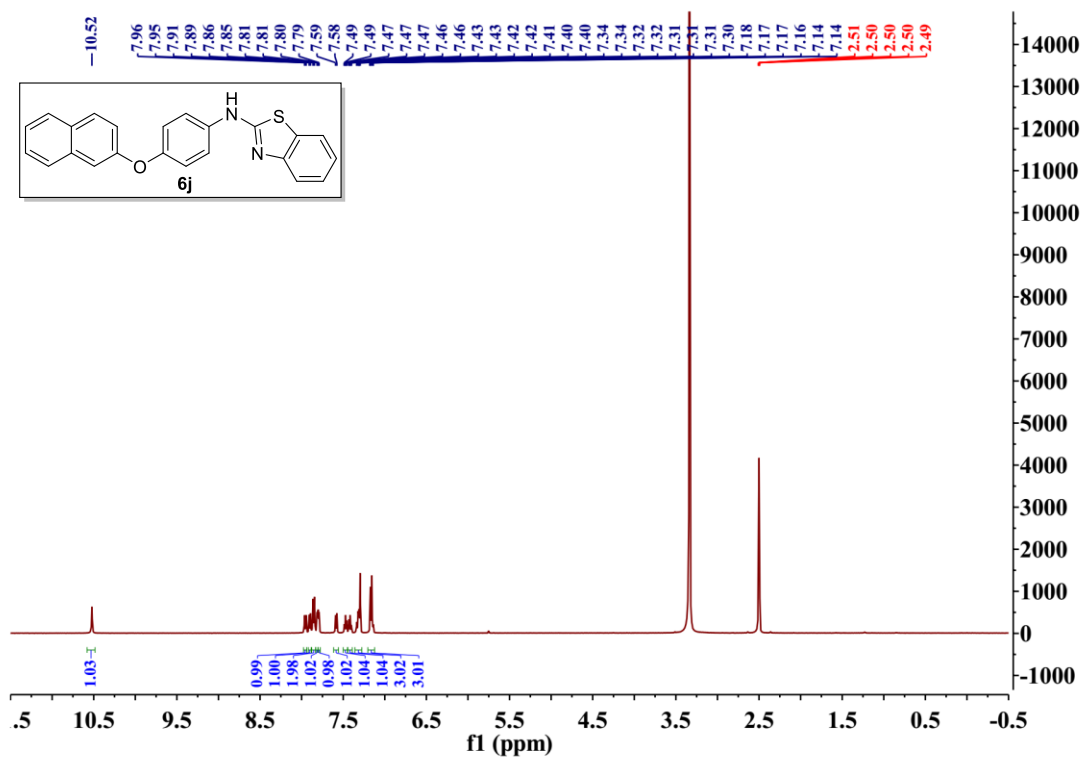

➤ <sup>13</sup>C NMR spectrum for **6j**

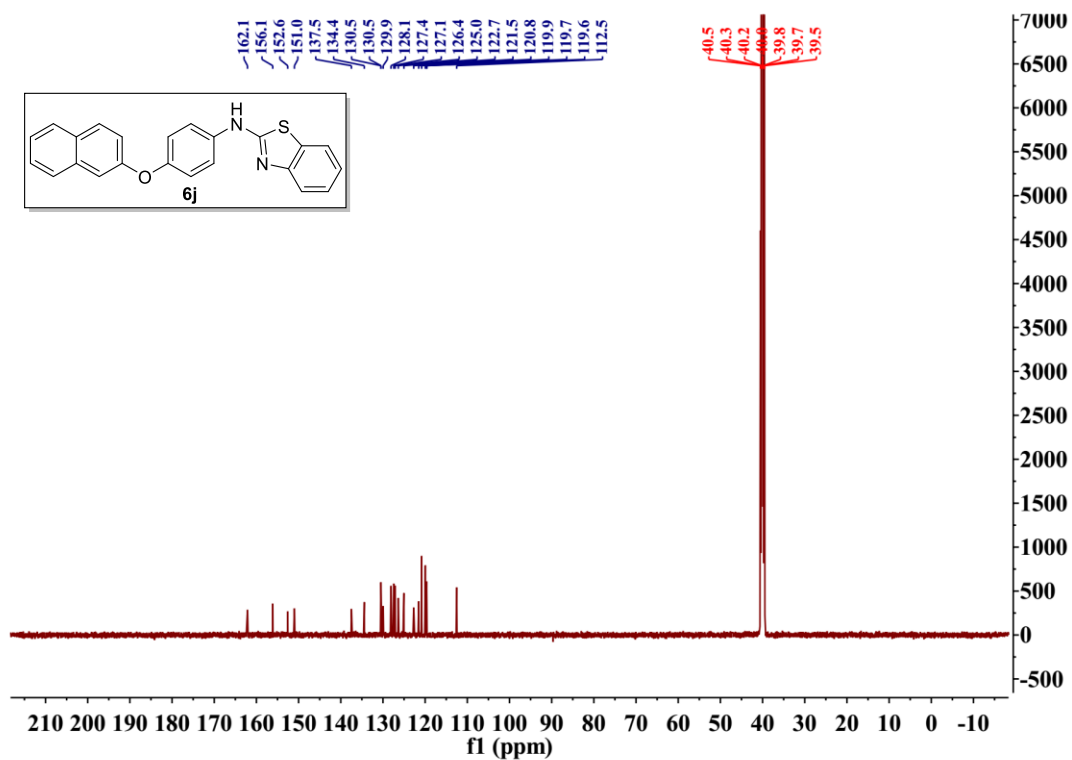

➤ HRMS spectrum for **6j**

Generic Display Report (all)

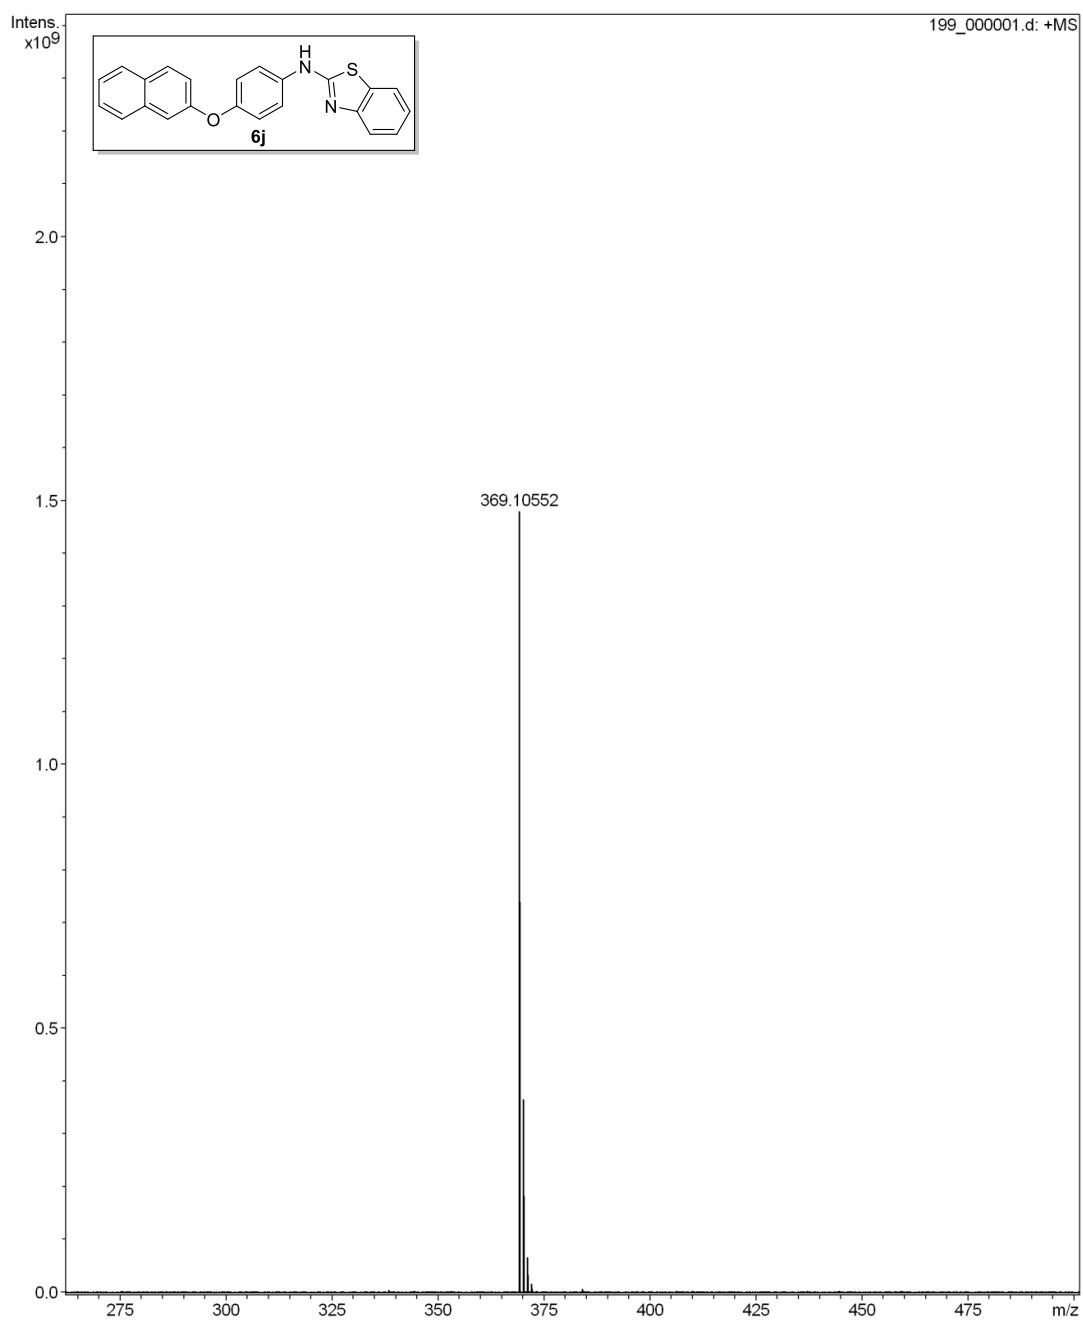

➤ <sup>1</sup>H NMR spectrum for **6k**

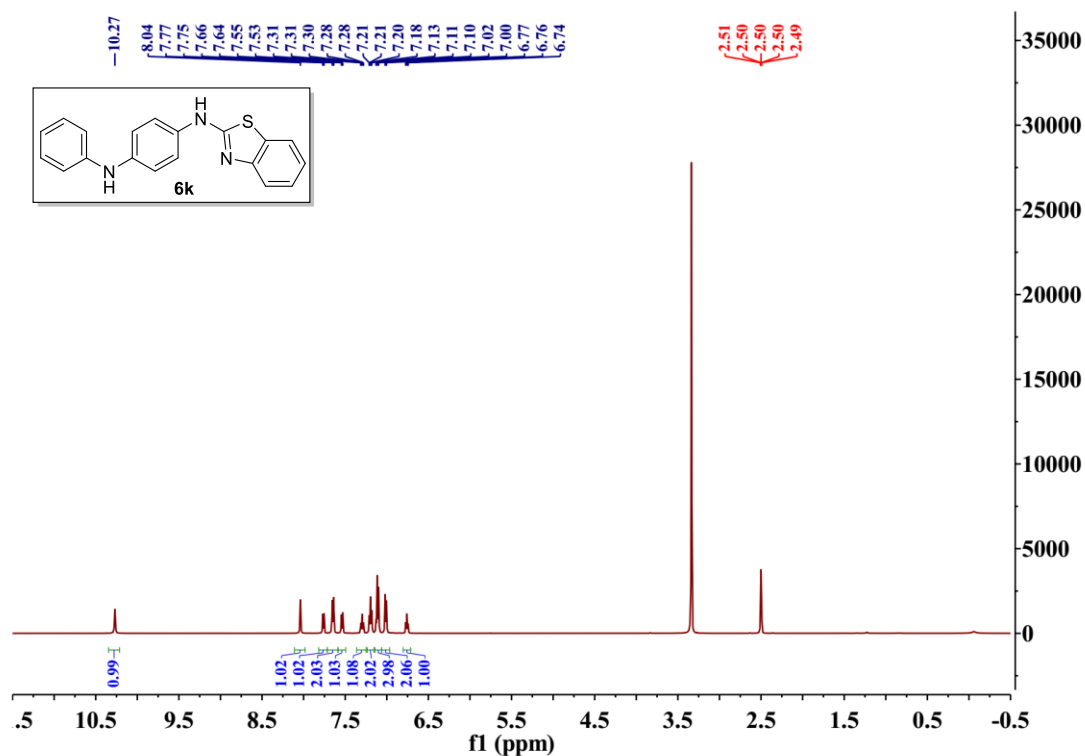

➤ <sup>13</sup>C NMR spectrum for **6k**

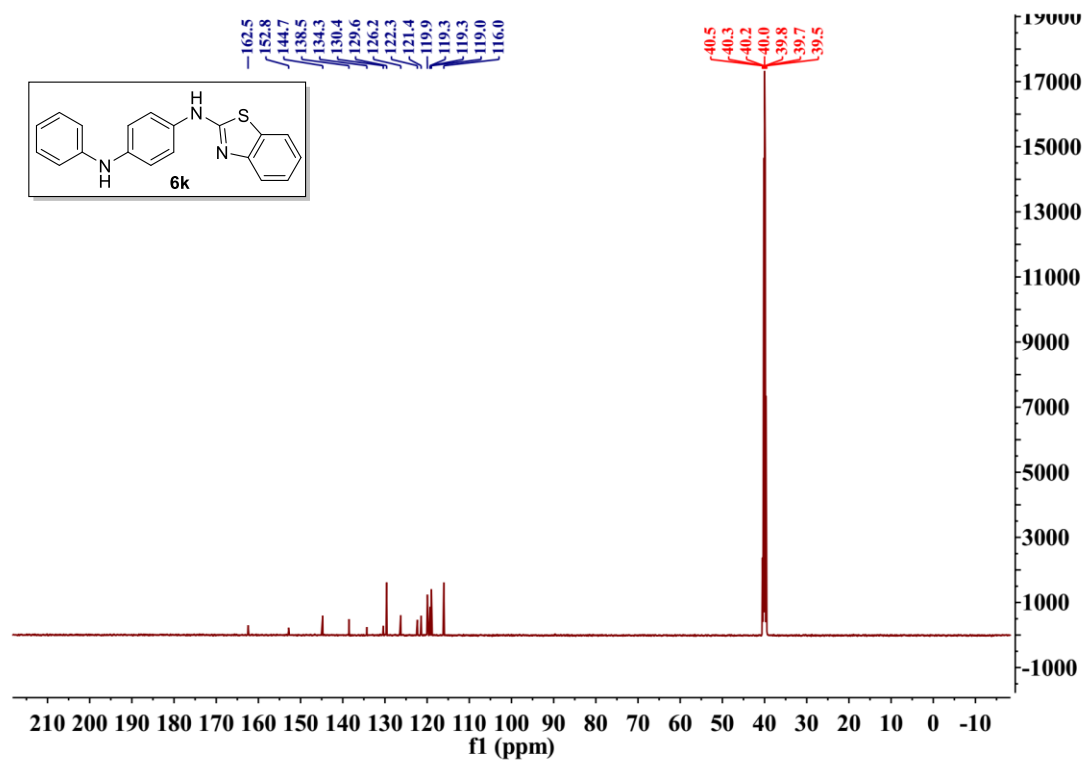

➤ HRMS spectrum for **6k**

Generic Display Report (all)

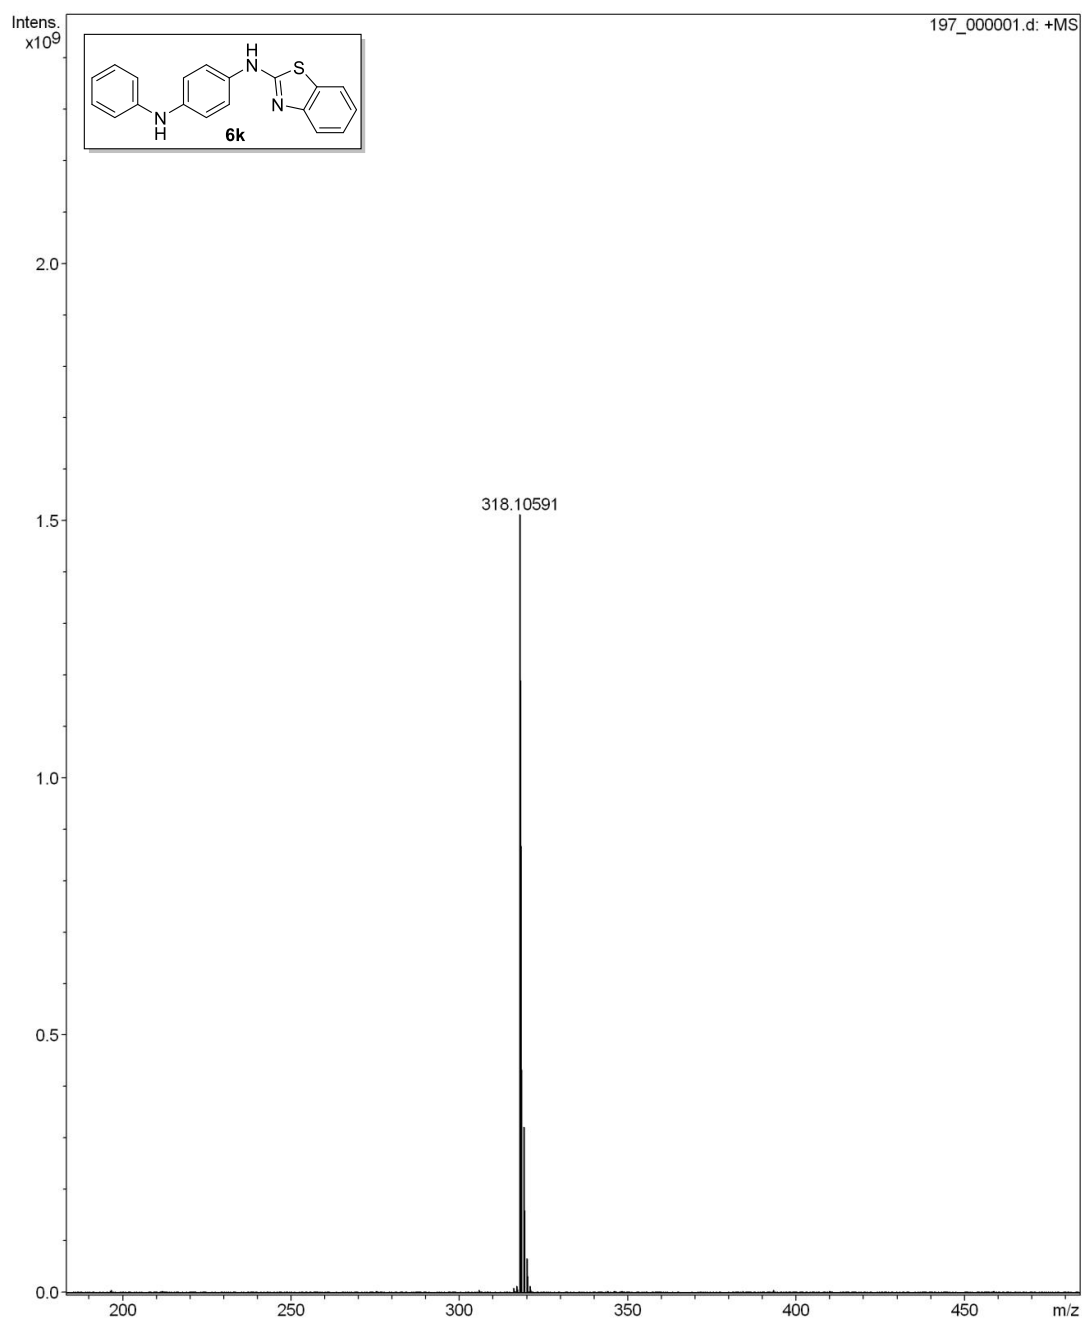

➤ <sup>1</sup>H NMR spectrum for **7a**

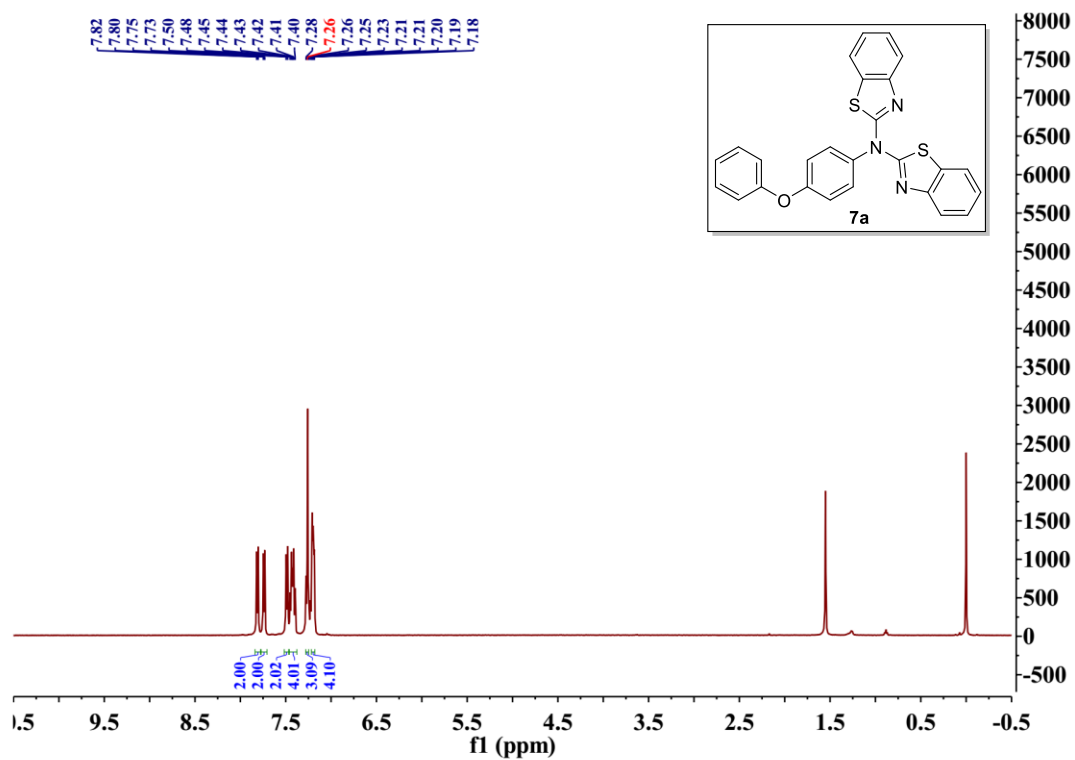

➤ <sup>13</sup>C NMR spectrum for **7a**

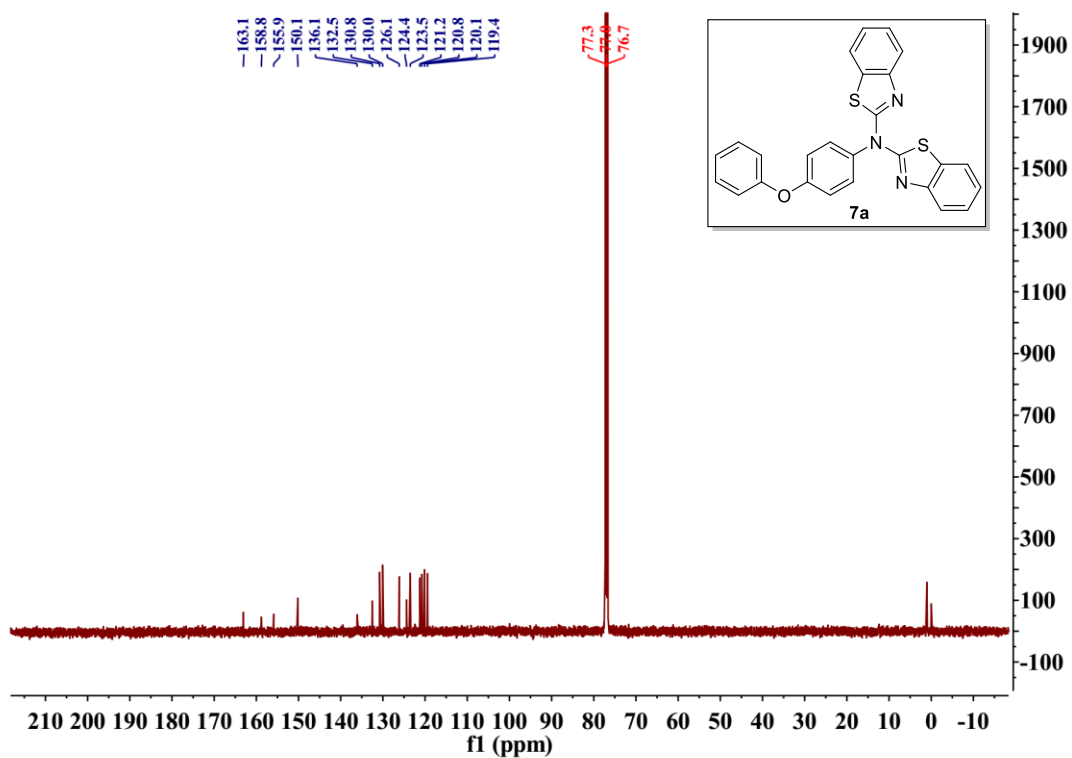

➤ HRMS spectrum for **7a**

W-C-028 #21 RT: 0.21 AV: 1 SB: 11 0.75-0.96 NL: 3.64E7  
T: FTMS + c APCI corona Full ms [60.0000-900.0000]

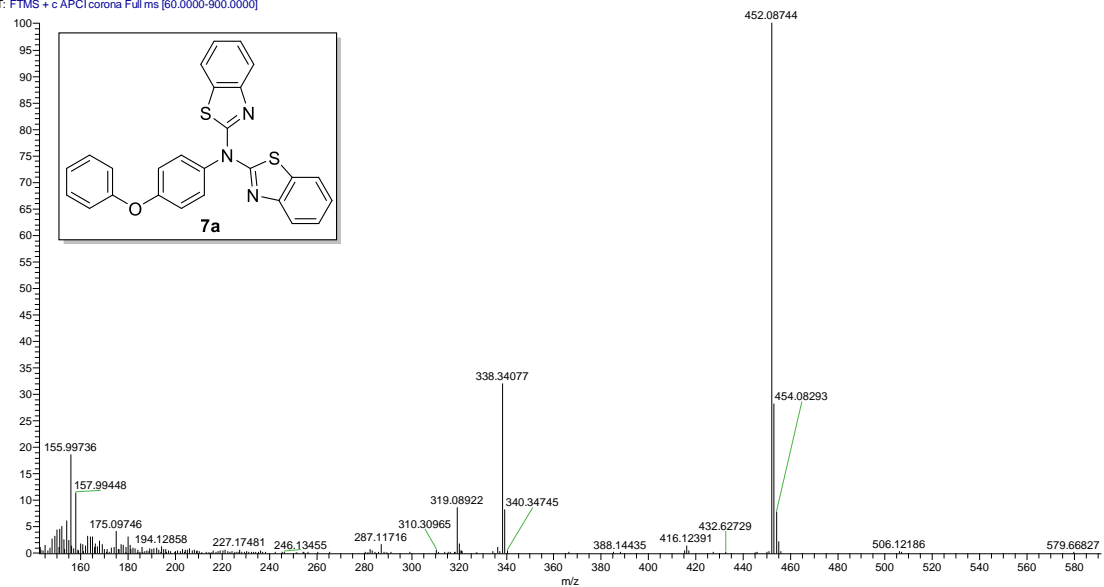

➤ <sup>1</sup>H NMR spectrum for **7b**

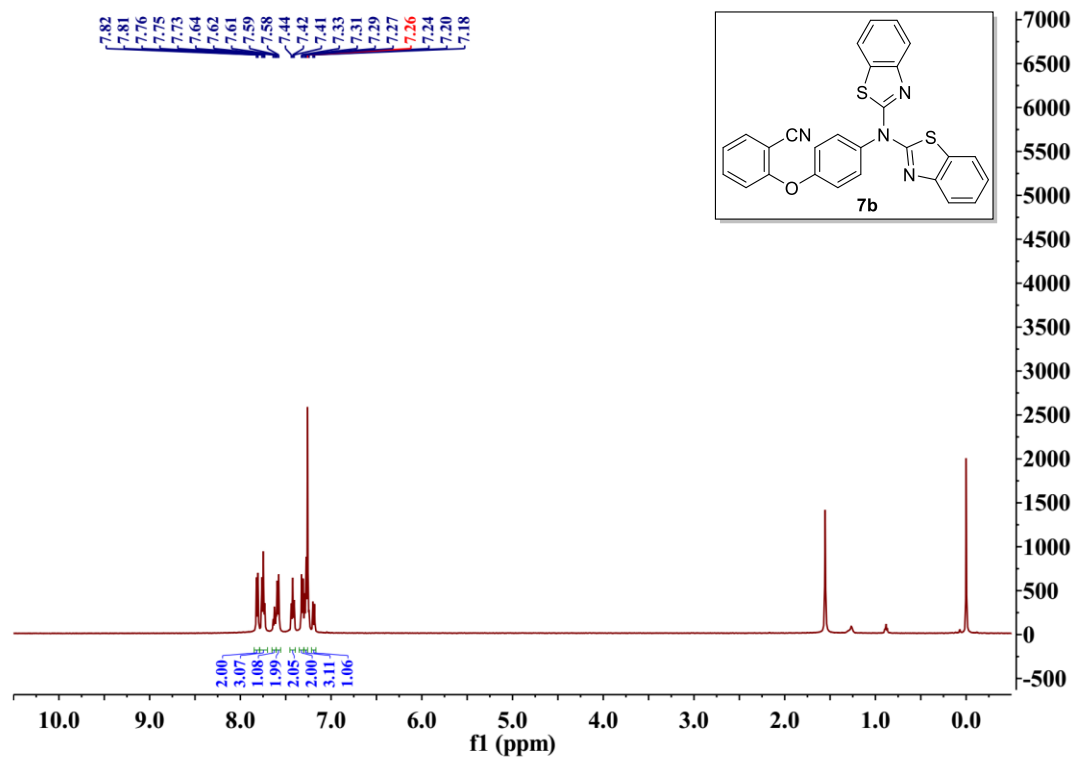

➤ <sup>13</sup>C NMR spectrum for **7b**

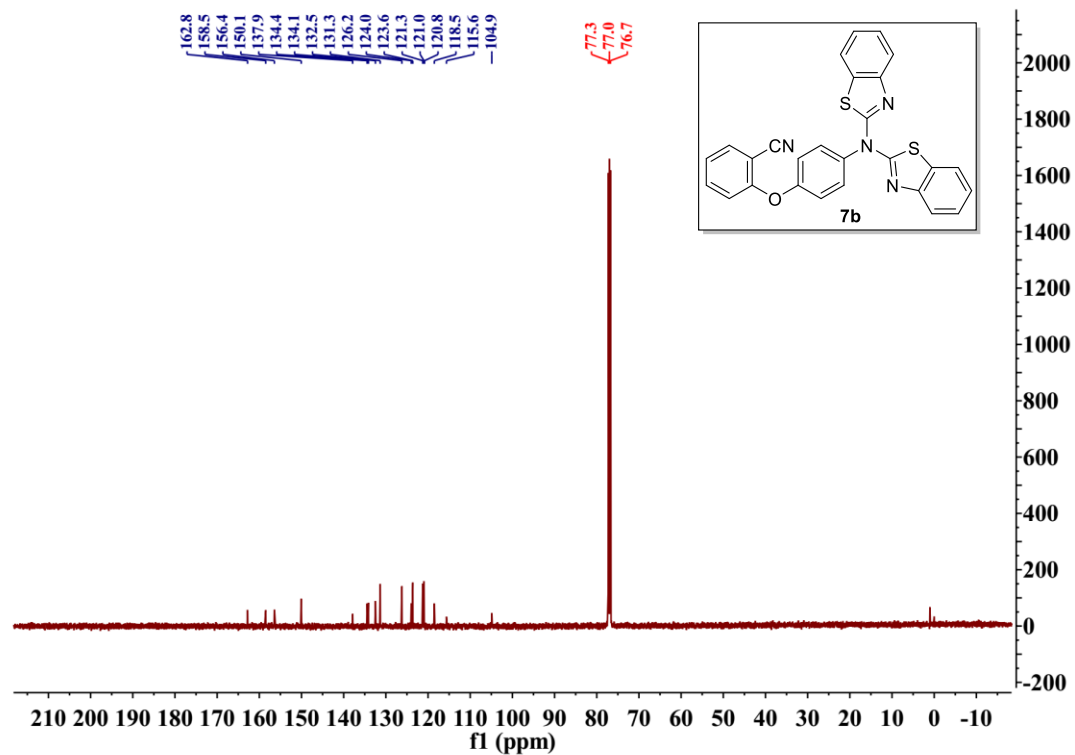





➤ <sup>1</sup>H NMR spectrum for **7c**

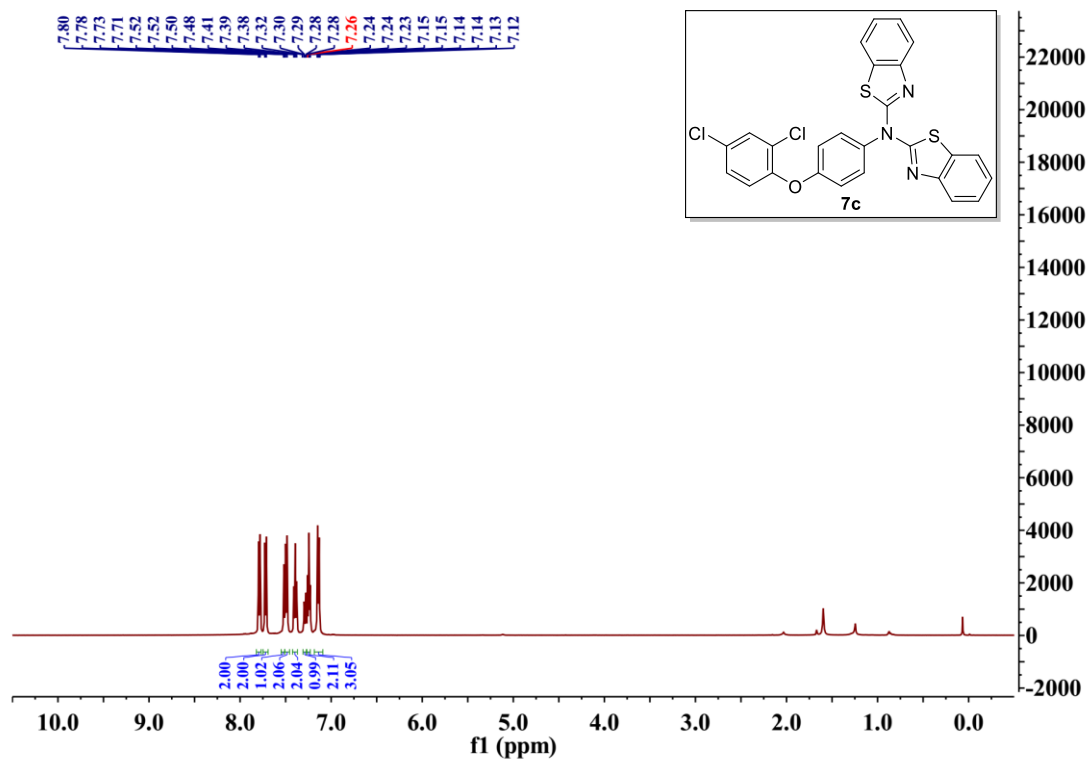

➤ <sup>13</sup>C NMR spectrum for **7c**

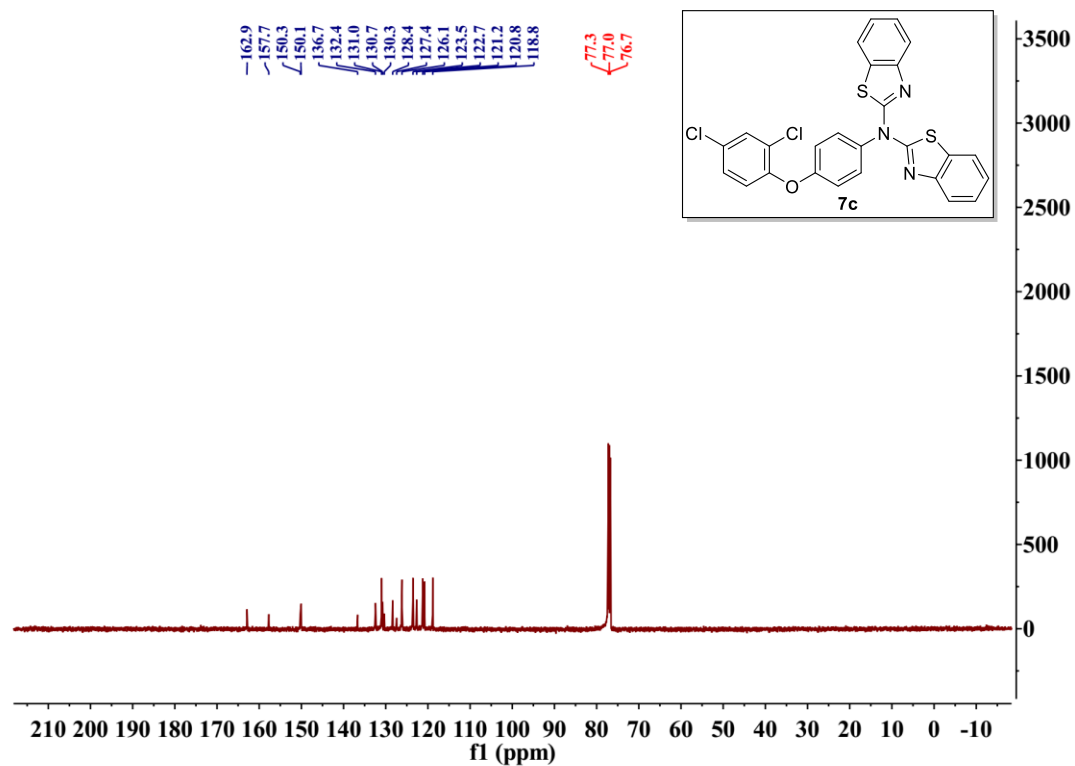

➤ HRMS spectrum for **7c**

W-C-142 #19 RT: 0.21 AV: 1 SB: 9 0.51-0.71 NL: 8.31E7  
T: FTMS + c APCI corona Full ms [60.0000-900.0000]

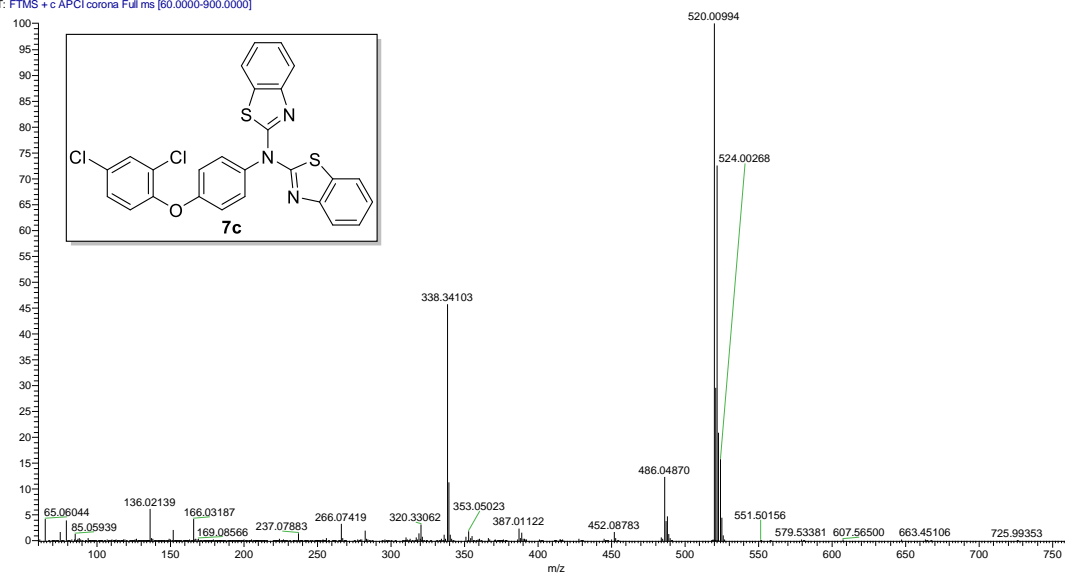

➤ <sup>1</sup>H NMR spectrum for **7d**

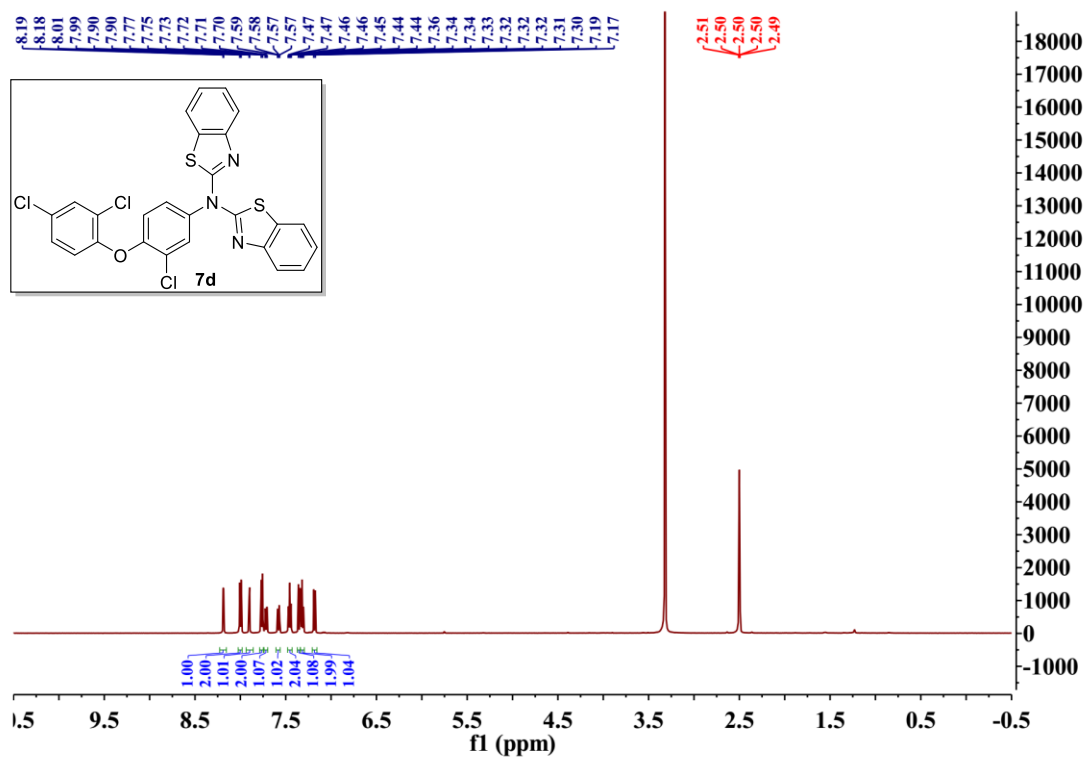

➤ <sup>13</sup>C NMR spectrum for **7d**

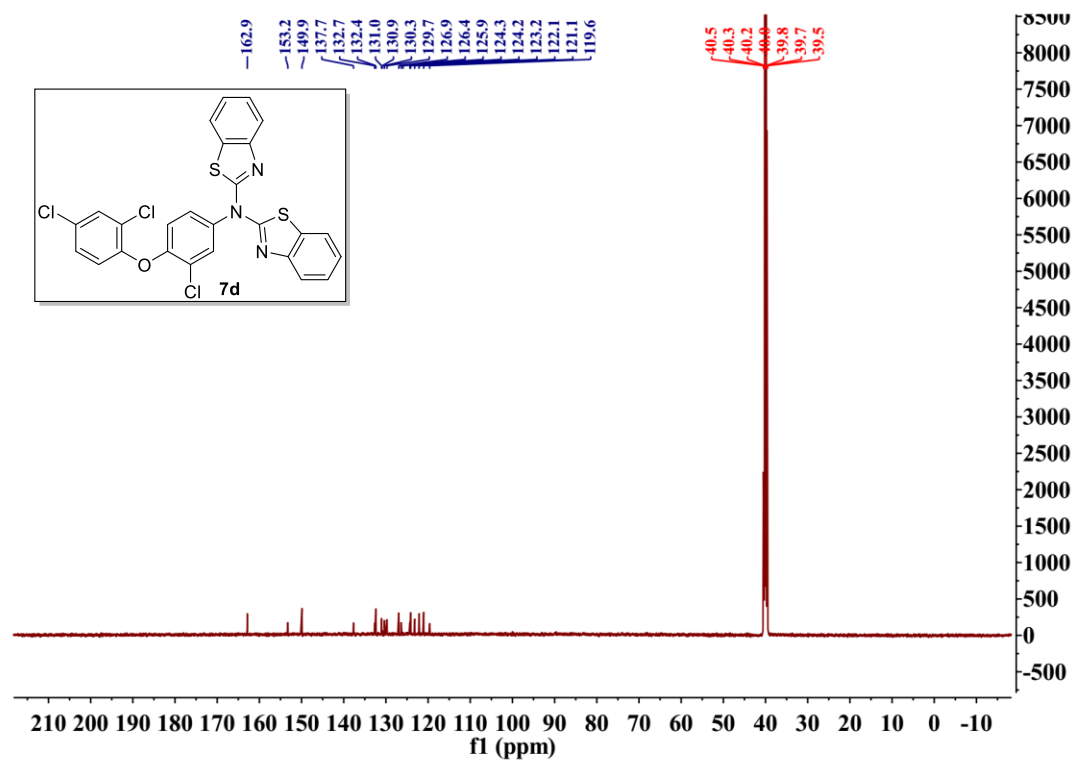

➤ HRMS spectrum for **7d**

W-C-172 #21 RT: 0.23 AV: 1 SB: 7 0.47-0.62 NL: 8.38E7  
T: FTMS + c APCI/corona Full ms [80.0000-900.0000]

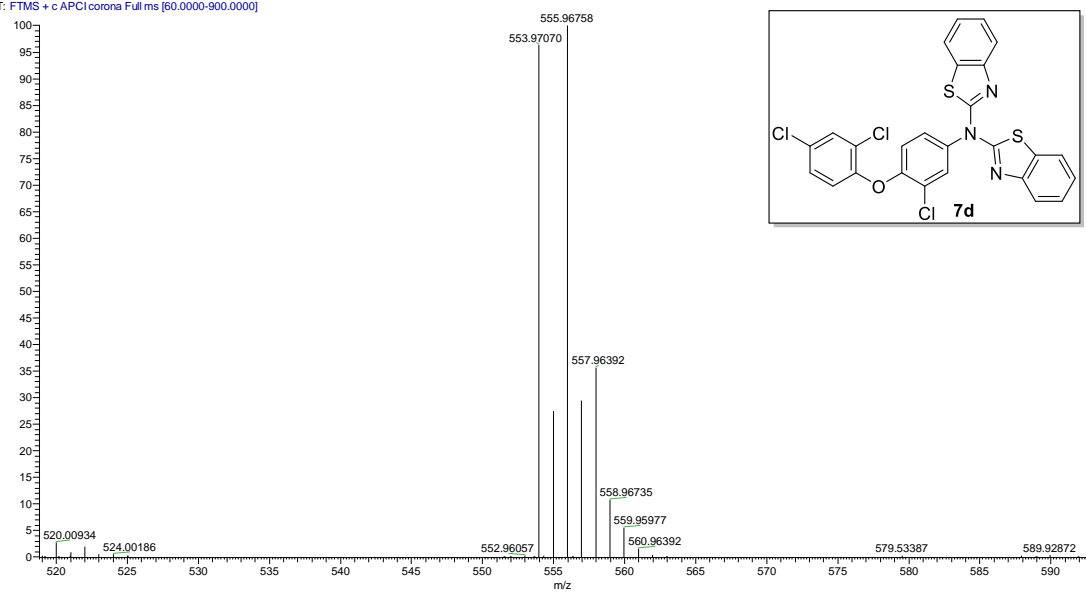

➤ <sup>1</sup>H NMR spectrum for **7e**

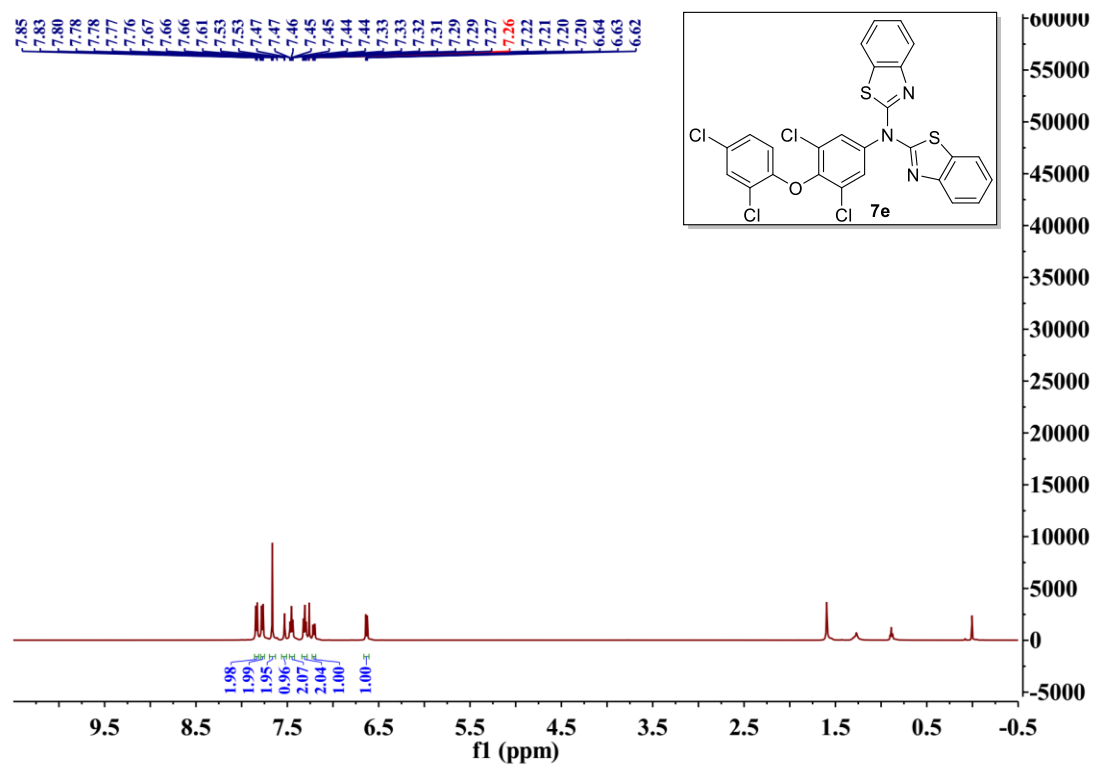

➤ <sup>13</sup>C NMR spectrum for **7e**

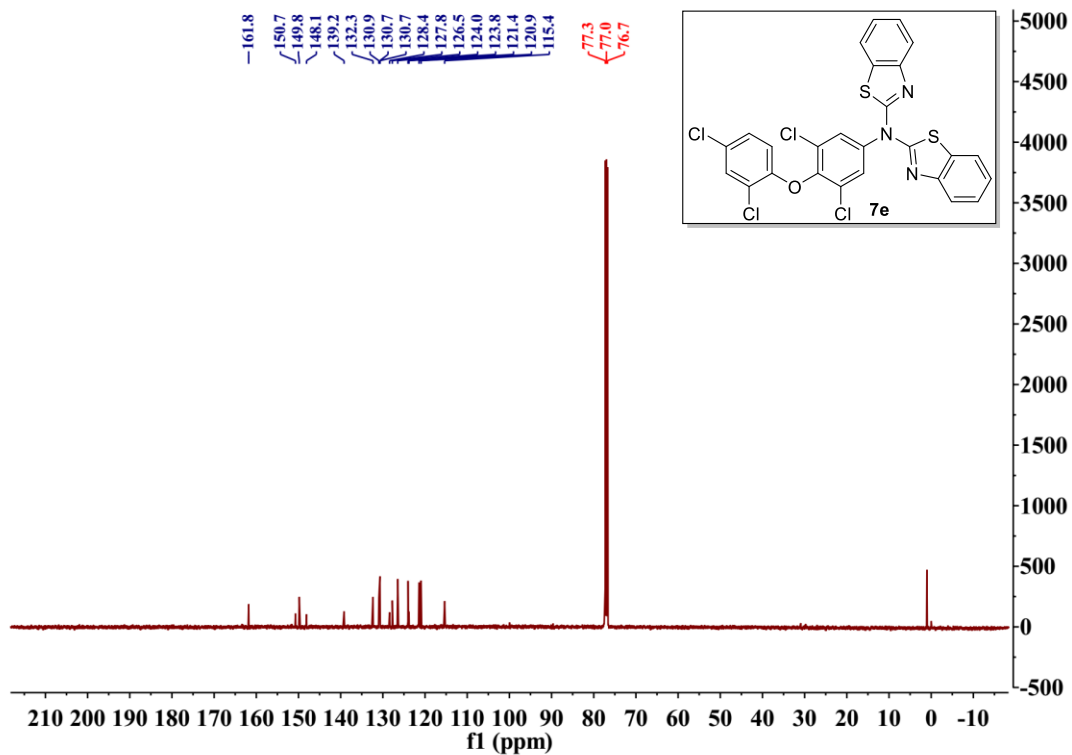

➤ HRMS spectrum for **7e**

W-C-168 #21 RT: 0.23 AV: 1 SB: 9 0.51-0.69 NL: 7.59E7  
T: FTMS + c APCI/corona Full ms [60.0000-900.0000]

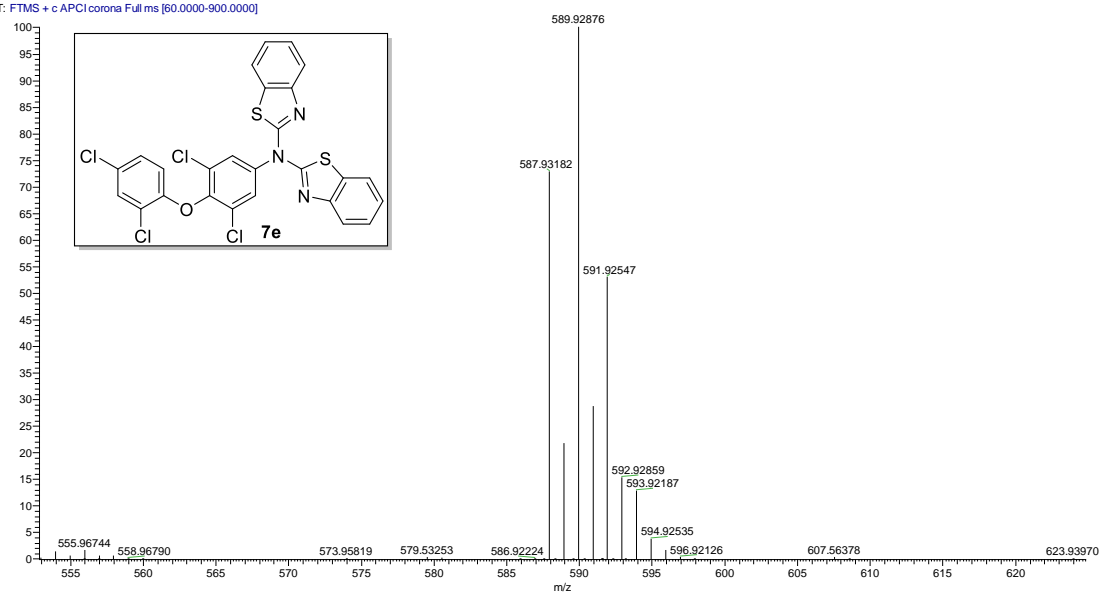

➤ <sup>1</sup>H NMR spectrum for **7f**

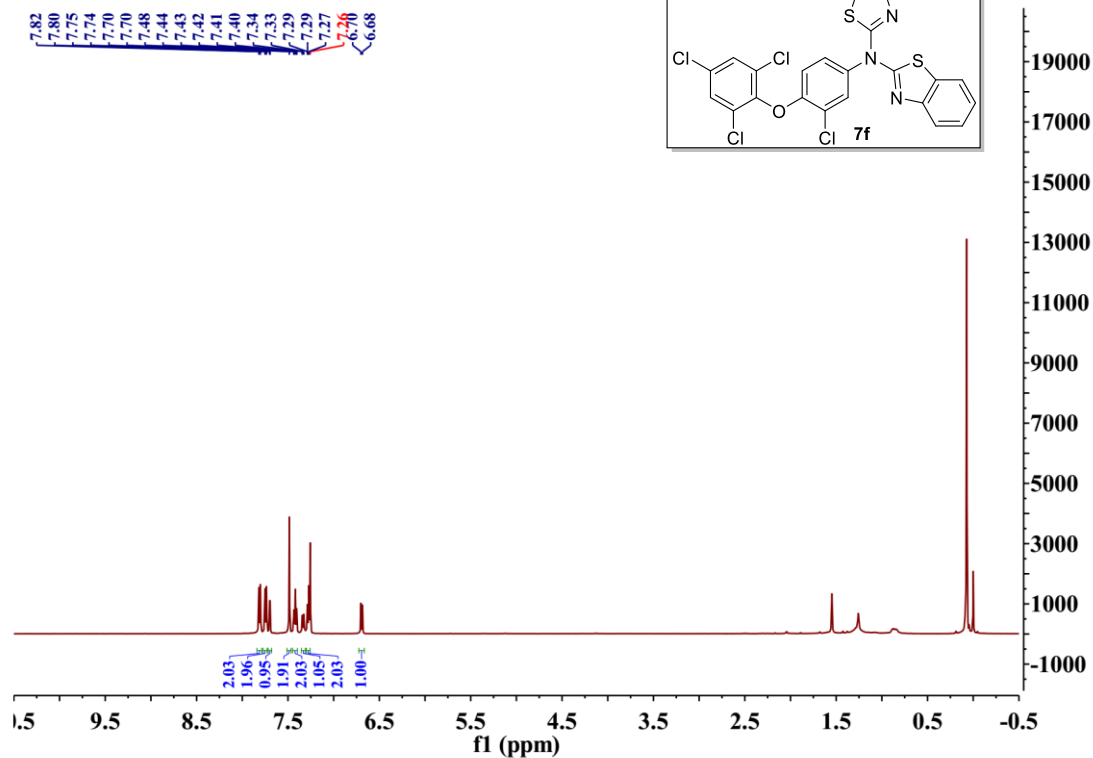

➤ <sup>13</sup>C NMR spectrum for **7f**

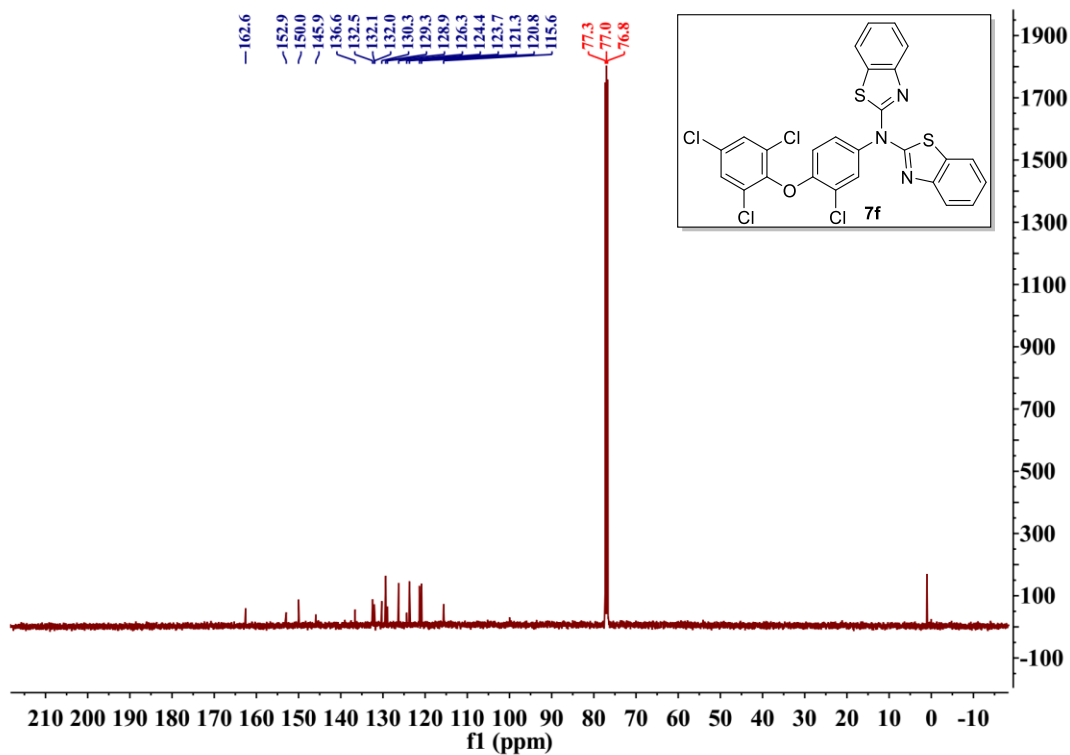



➤ HRMS spectrum for **7f**

W-C-187 #19 RT: 0.21 AV: 1 SB: 6 0.59-0.72 NL: 7.92E7  
T: FTMS + c APCI/corona Full ms [80.0000-900.0000]

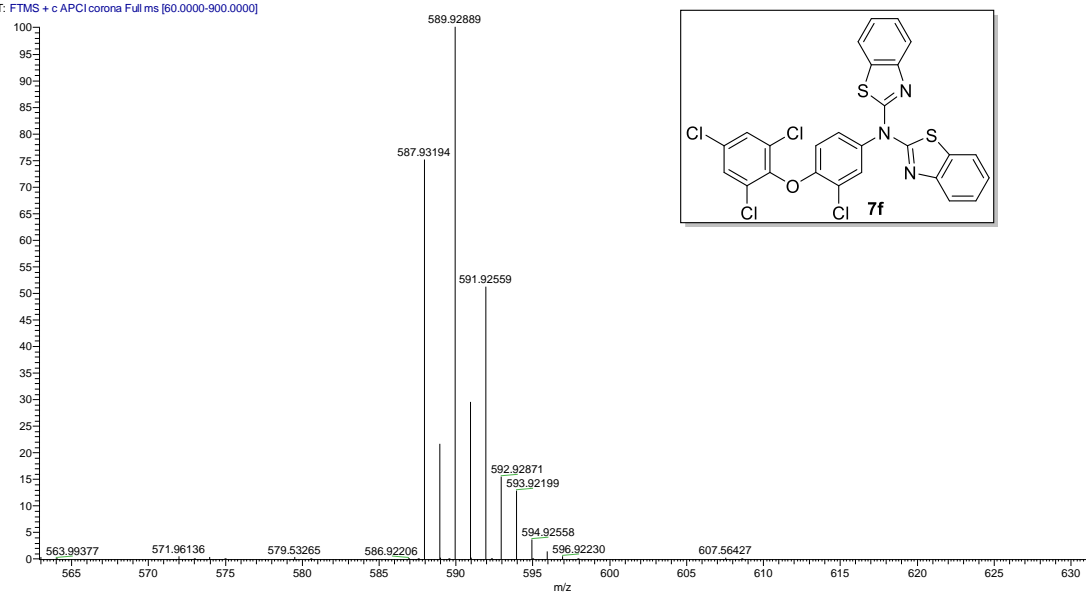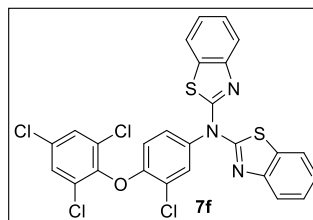

➤ <sup>1</sup>H NMR spectrum for **7g**

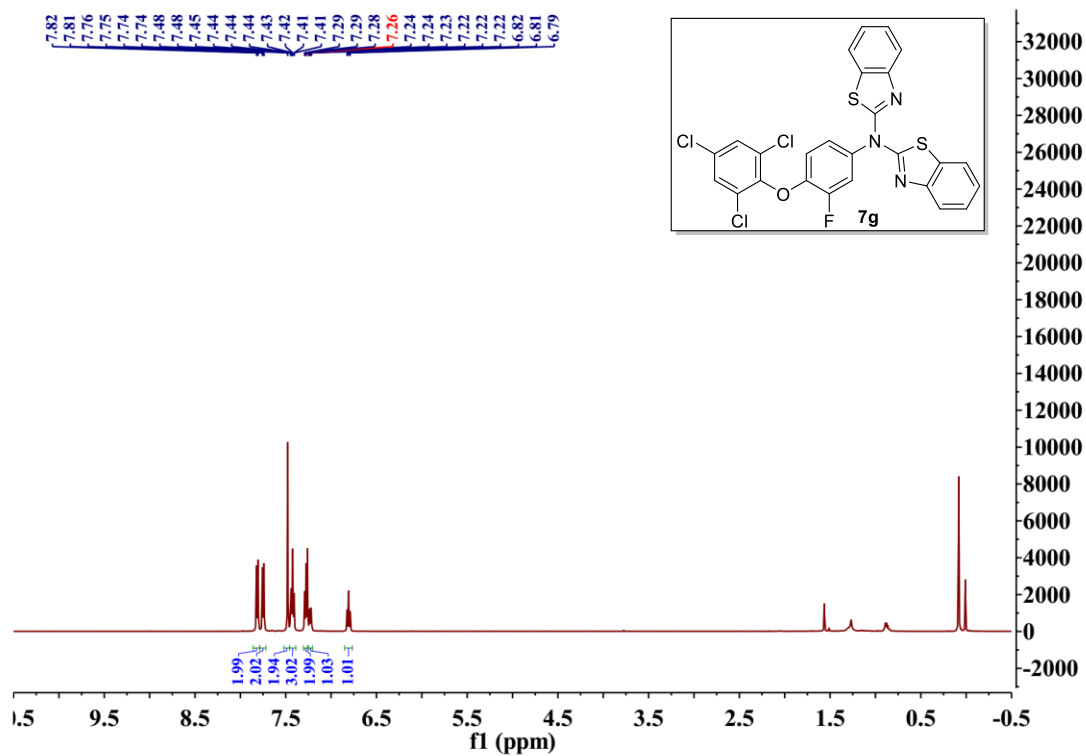

➤ <sup>13</sup>C NMR spectrum for **7g**

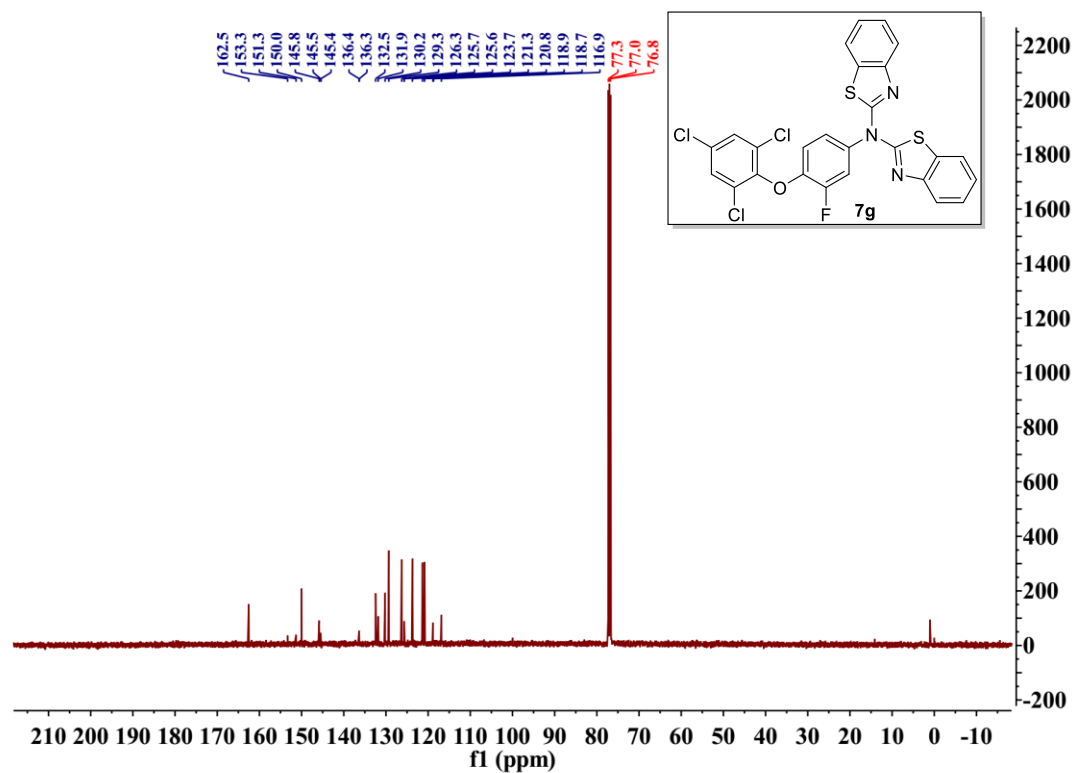

➤ HRMS spectrum for **7g**

W-C-185 #17 RT: 0.19 AV: 1 SB: 5 0.52-0.64 NL: 3.42E7  
T: FTMS +c APCI corona Full ms [60.0000-900.0000]

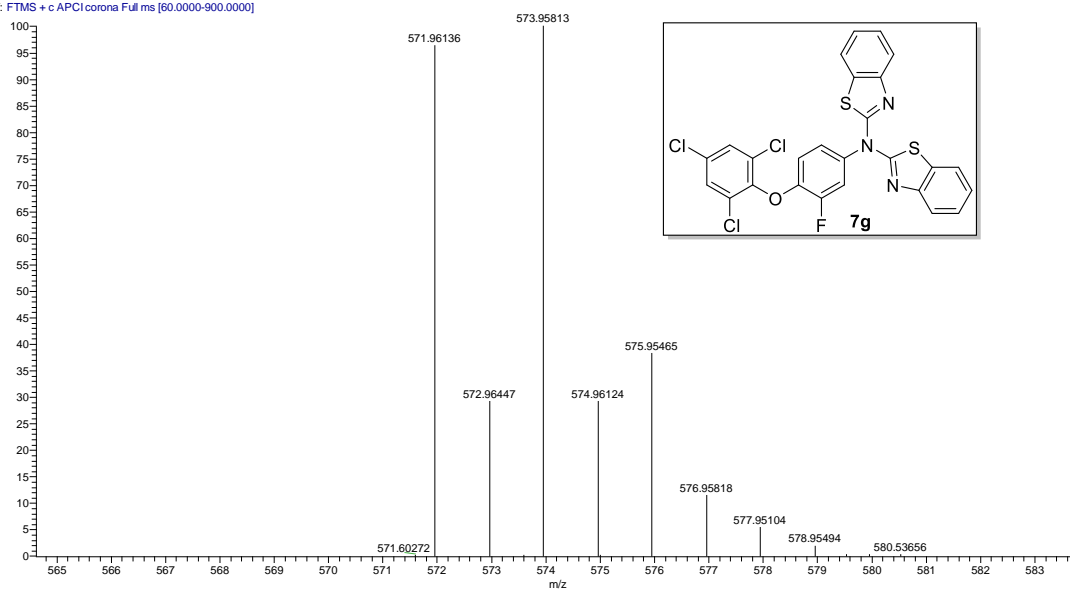

➤ <sup>1</sup>H NMR spectrum for **7h**

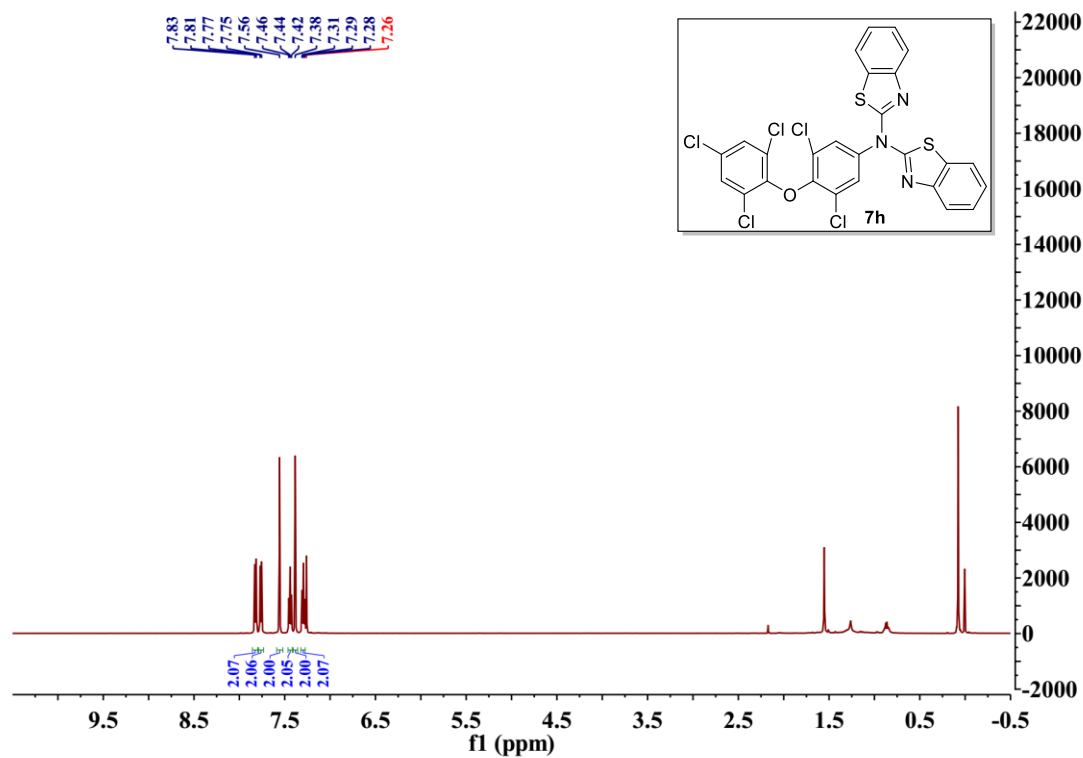

➤ <sup>13</sup>C NMR spectrum for **7h**

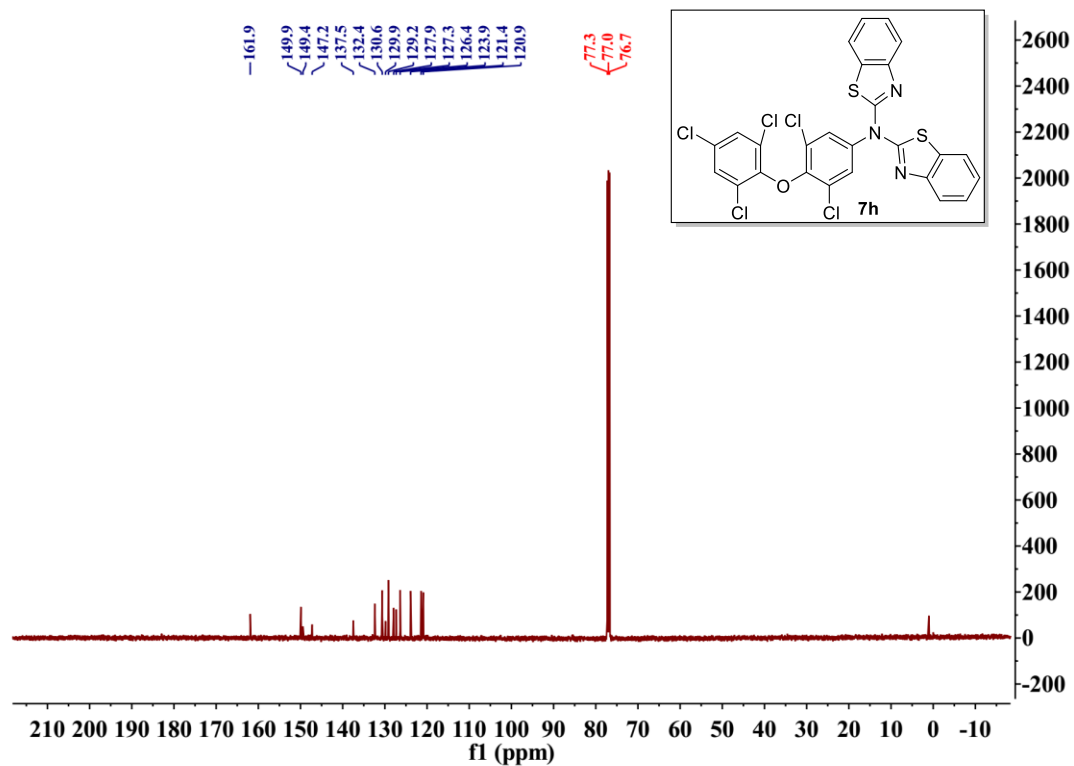

➤ HRMS spectrum for **7h**

W-C-166 #19 RT: 0.21 AV: 1 SB: 4 0.45-0.54 NL: 4.14E7  
T: FTMS + c APCI corona Full ms [60.0000-900.0000]

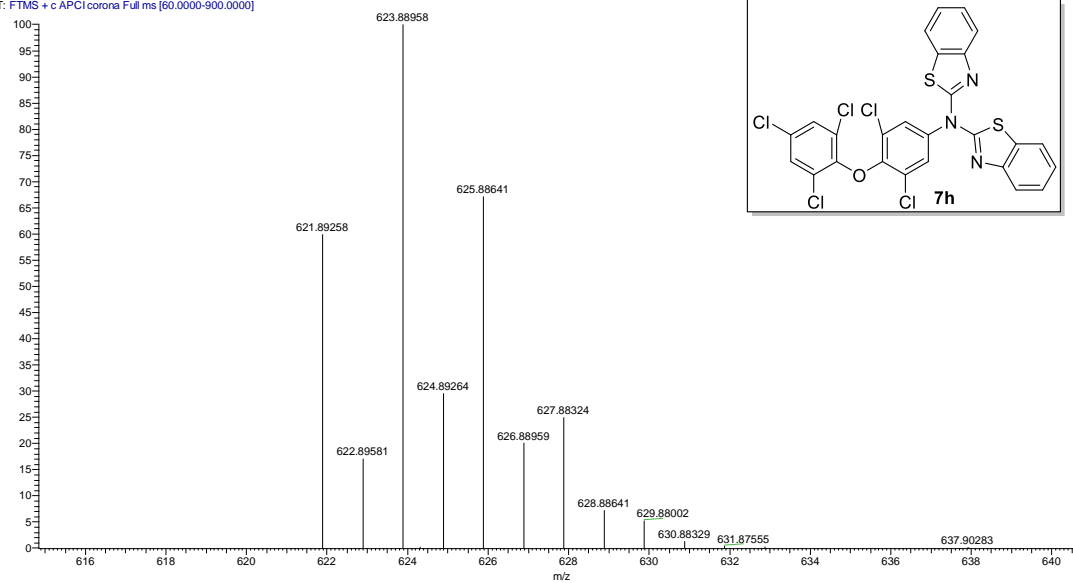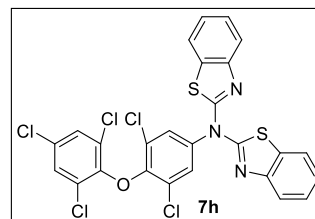

➤ <sup>1</sup>H NMR spectrum for **7i**

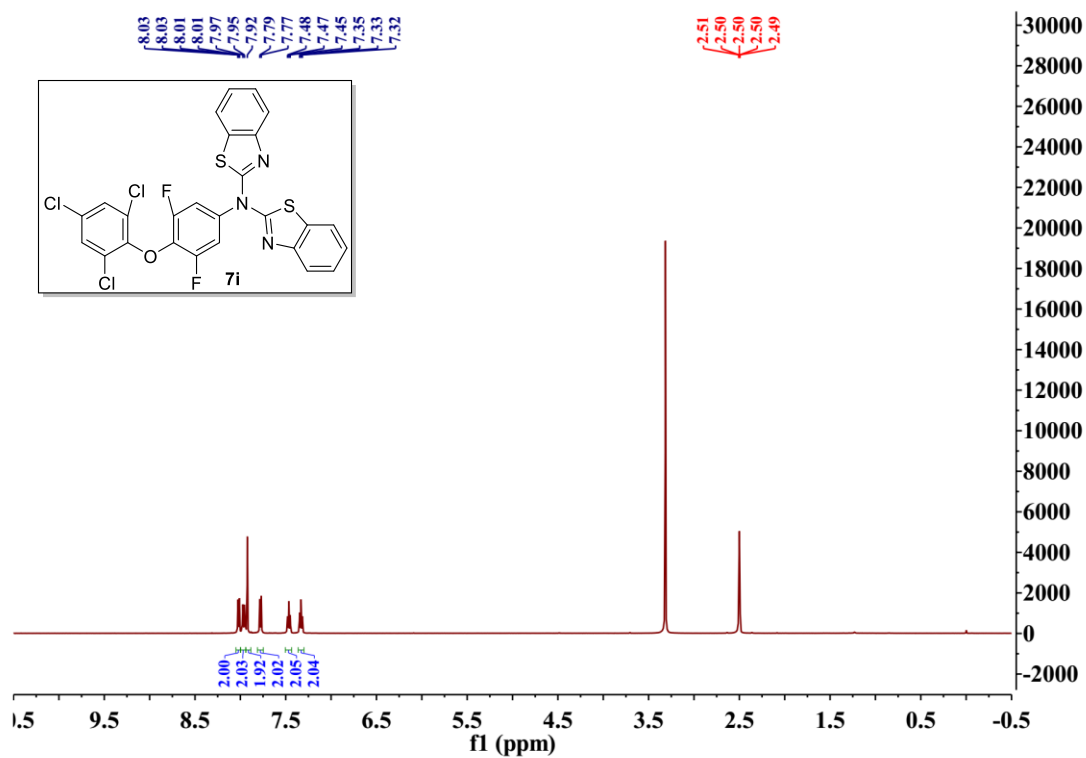

➤ <sup>13</sup>C NMR spectrum for **7i**

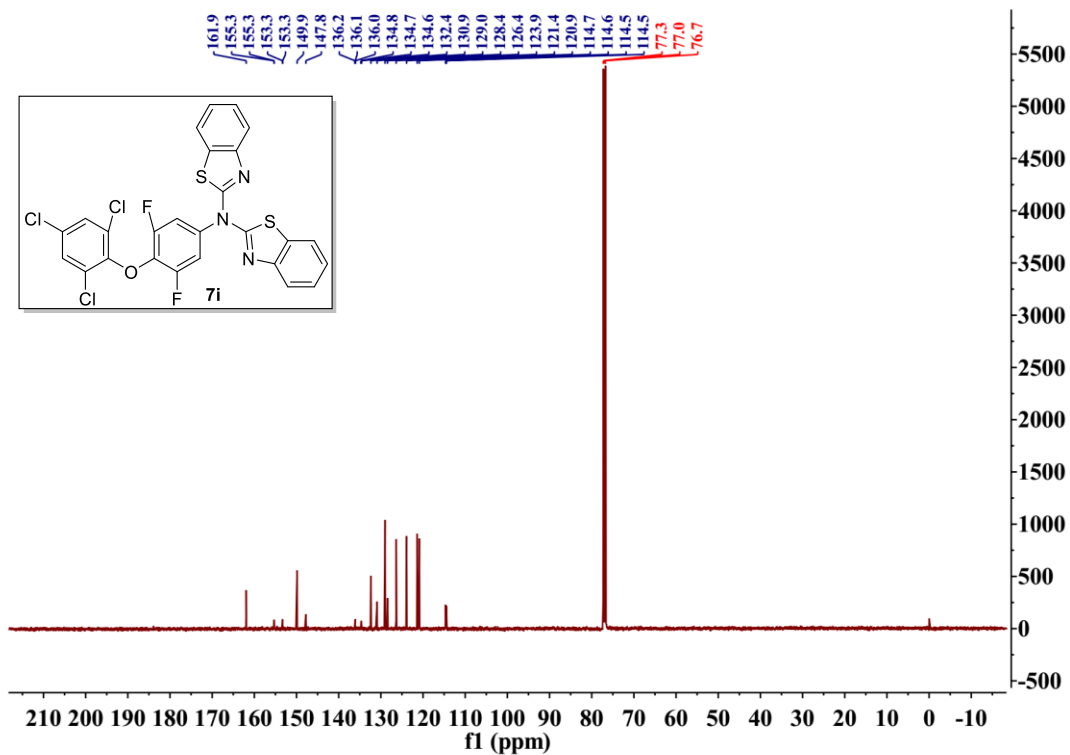

➤ HRMS spectrum for **7i**

W-C-181 #19 RT: 0.21 AV: 1 SB: 6 0.52-0.65 NL: 2.12E7  
T: FTMS +c APCI corona Full ms [60.0000-900.0000]

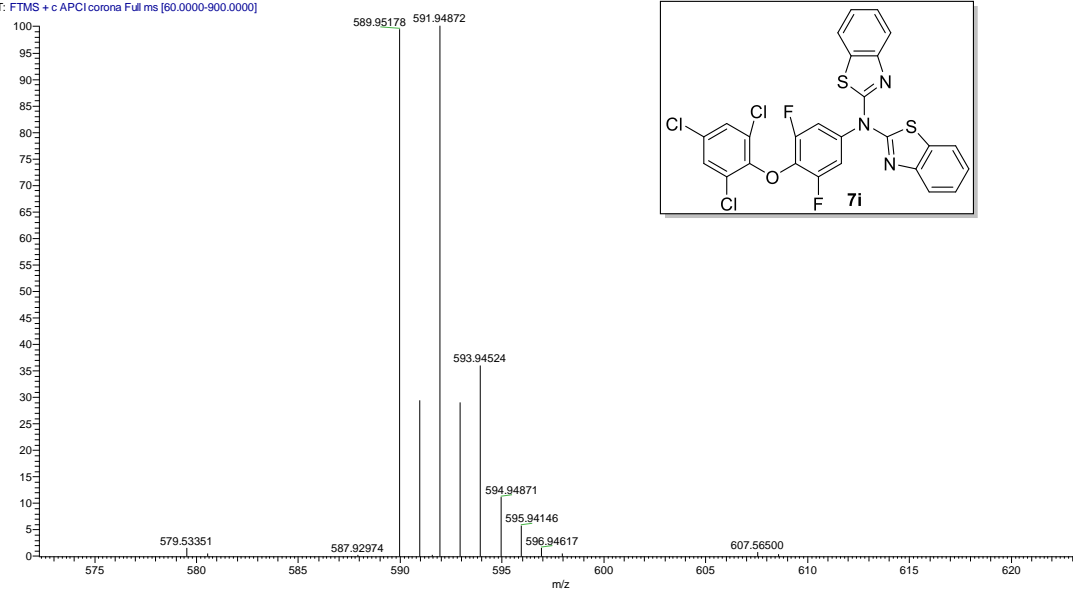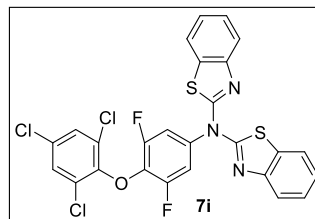

➤ <sup>1</sup>H NMR spectrum for **7j**

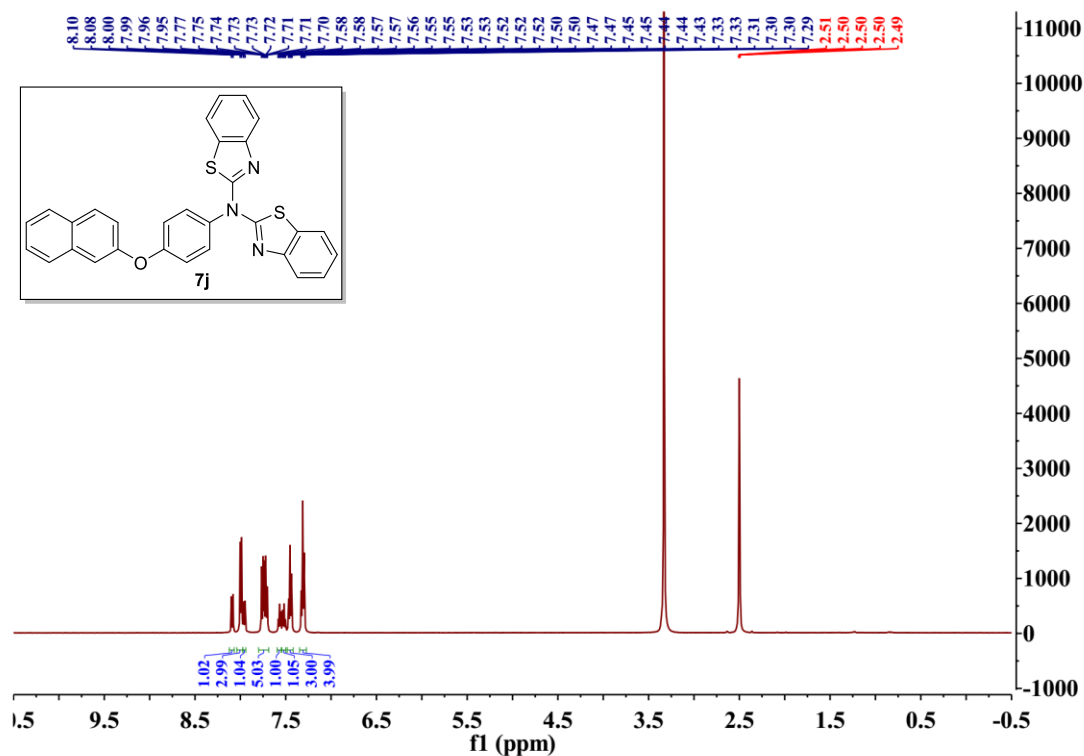

➤ <sup>13</sup>C NMR spectrum for **7j**

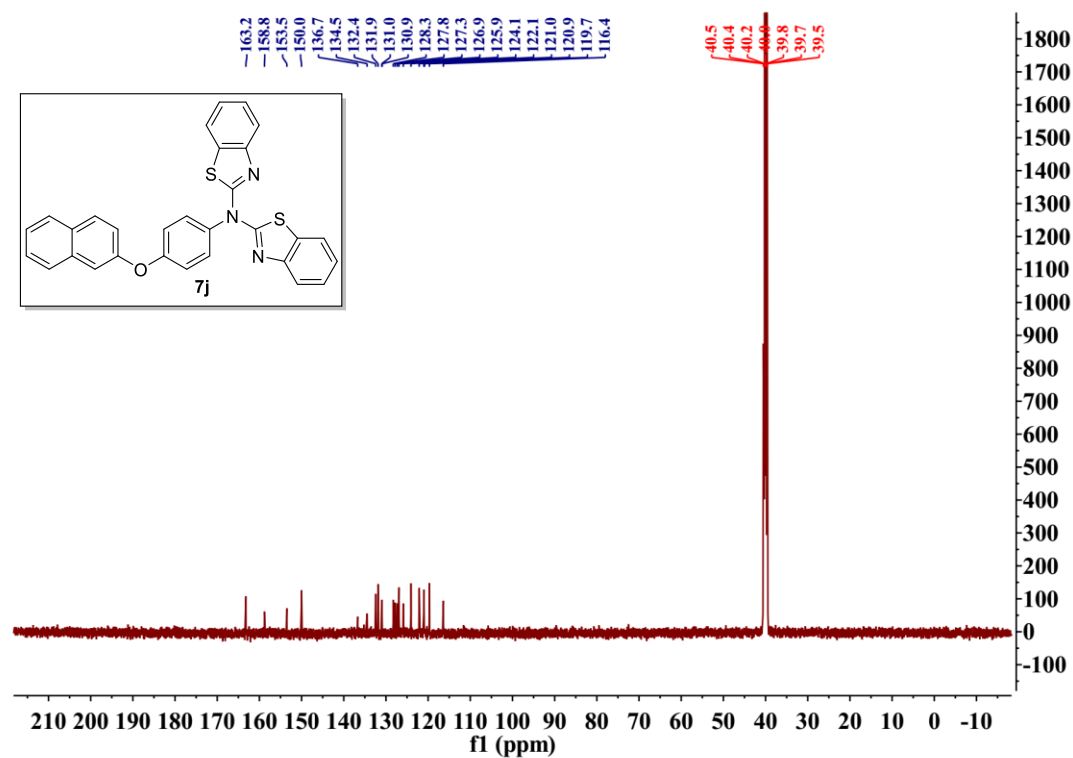



➤ HRMS spectrum for **7j**

W.C-198 #21 RT: 0.24 AV: 1 SB: 7 0.56-0.71 NL: 4.67E7  
T: FTMS + c APCI/corona Full.ms [60.0000-900.0000]

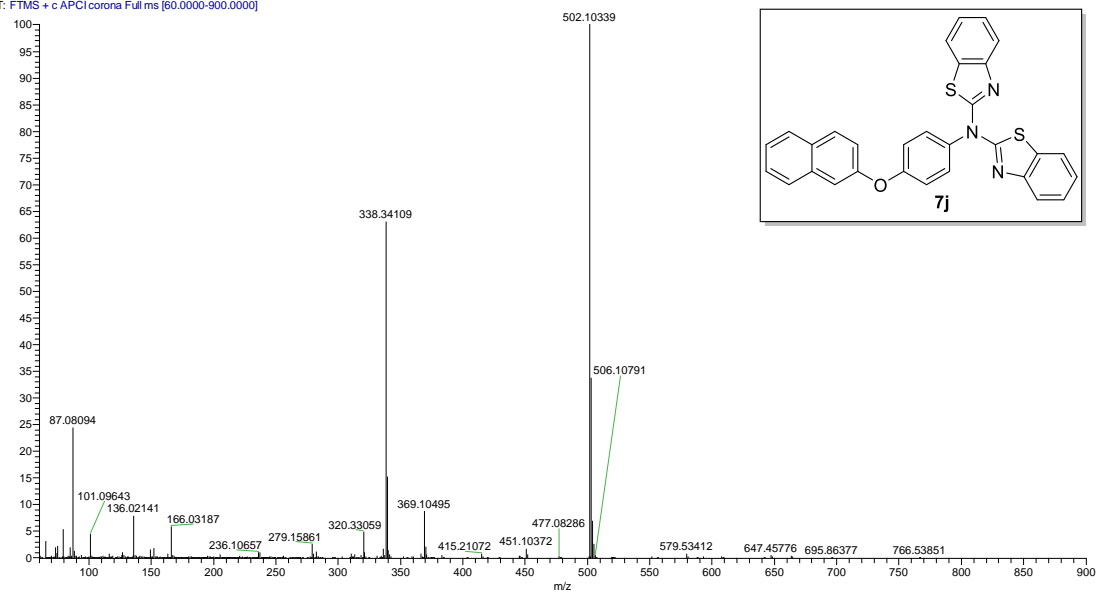

➤ <sup>1</sup>H NMR spectrum for **7k**

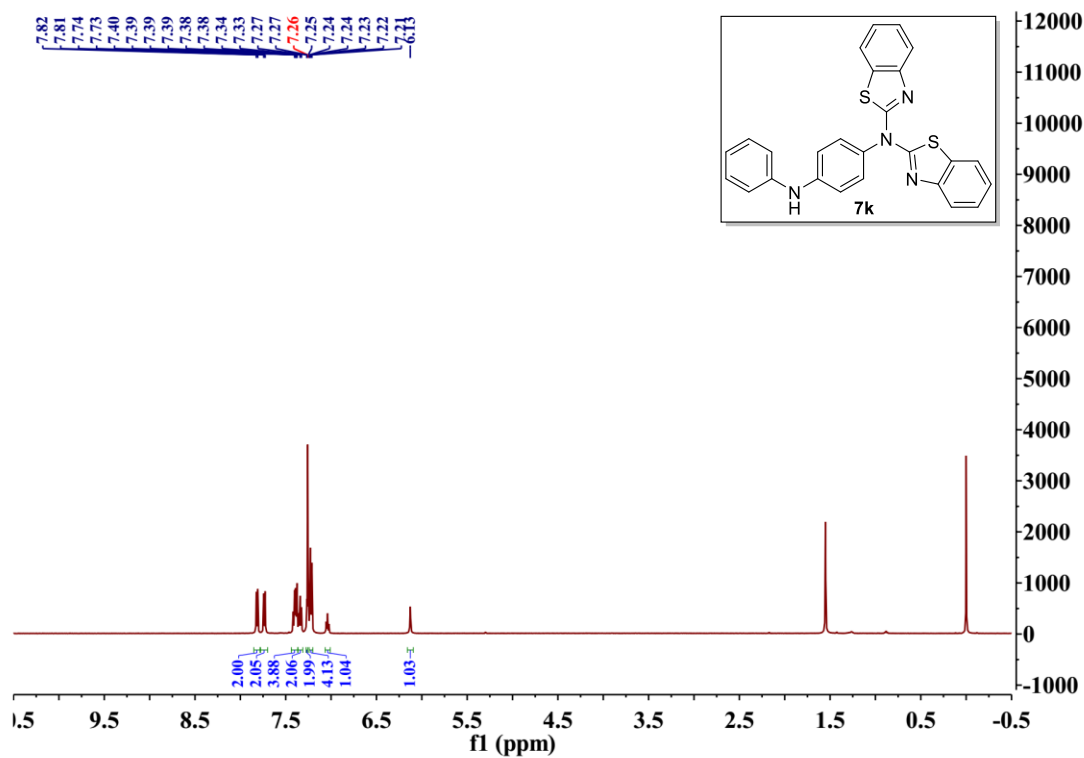

➤ <sup>13</sup>C NMR spectrum for **7k**

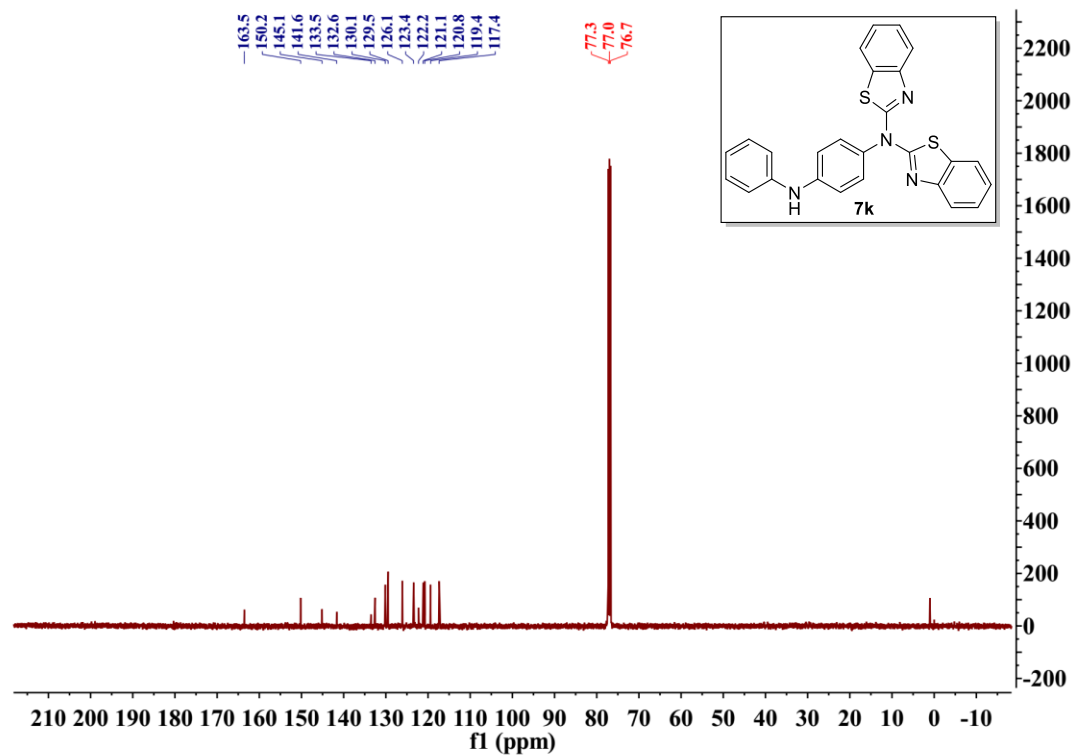

➤ HRMS spectrum for **7k**

W.C: 196 #17 RT: 0.19 AV: 1 SB: 7 0.51-0.66 NL: 2.74E8  
T: FTMS + c APCI/corona Full ms [60.0000-900.0000]

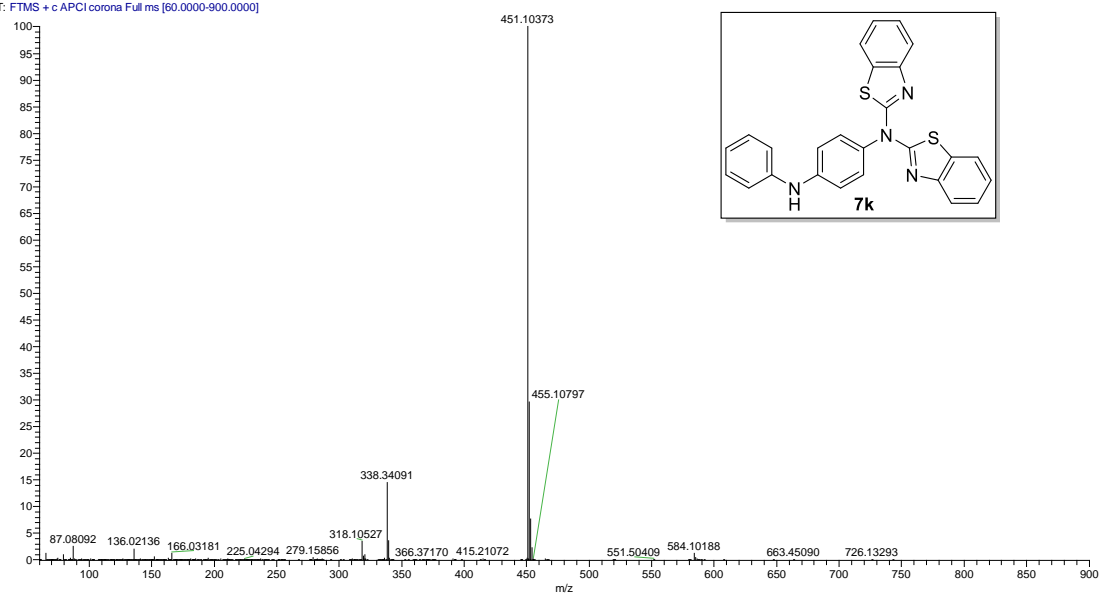

➤ <sup>1</sup>H NMR spectrum for **9**

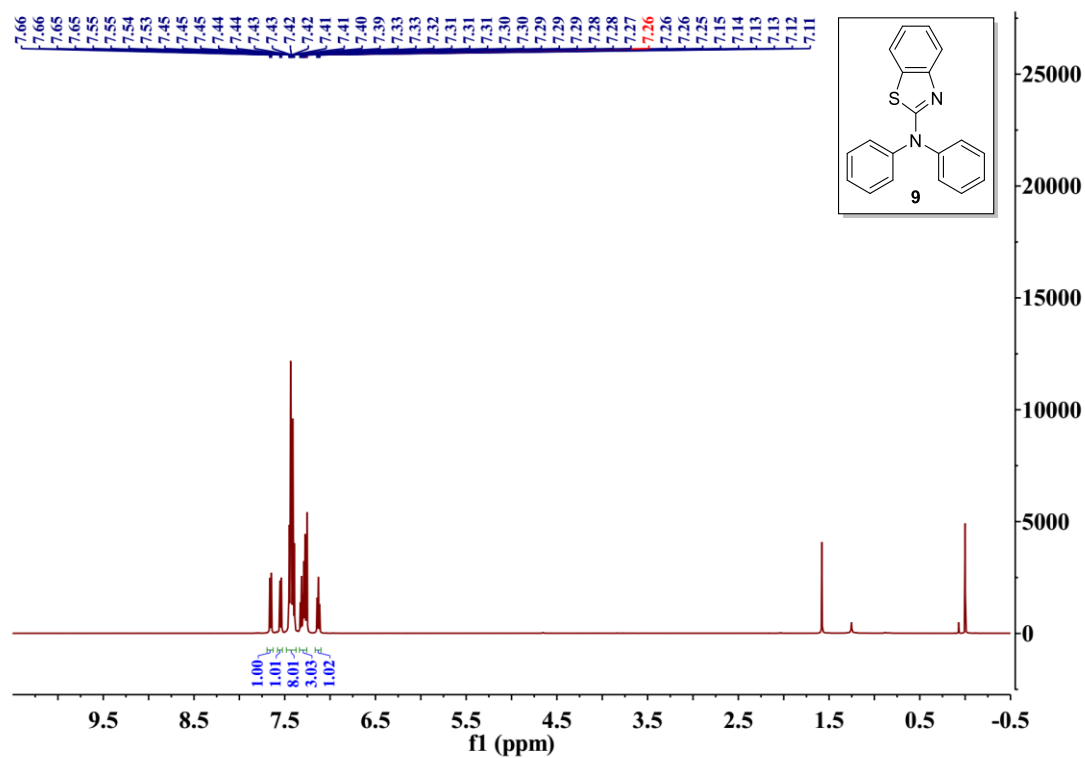

➤ <sup>13</sup>C NMR spectrum for **9**

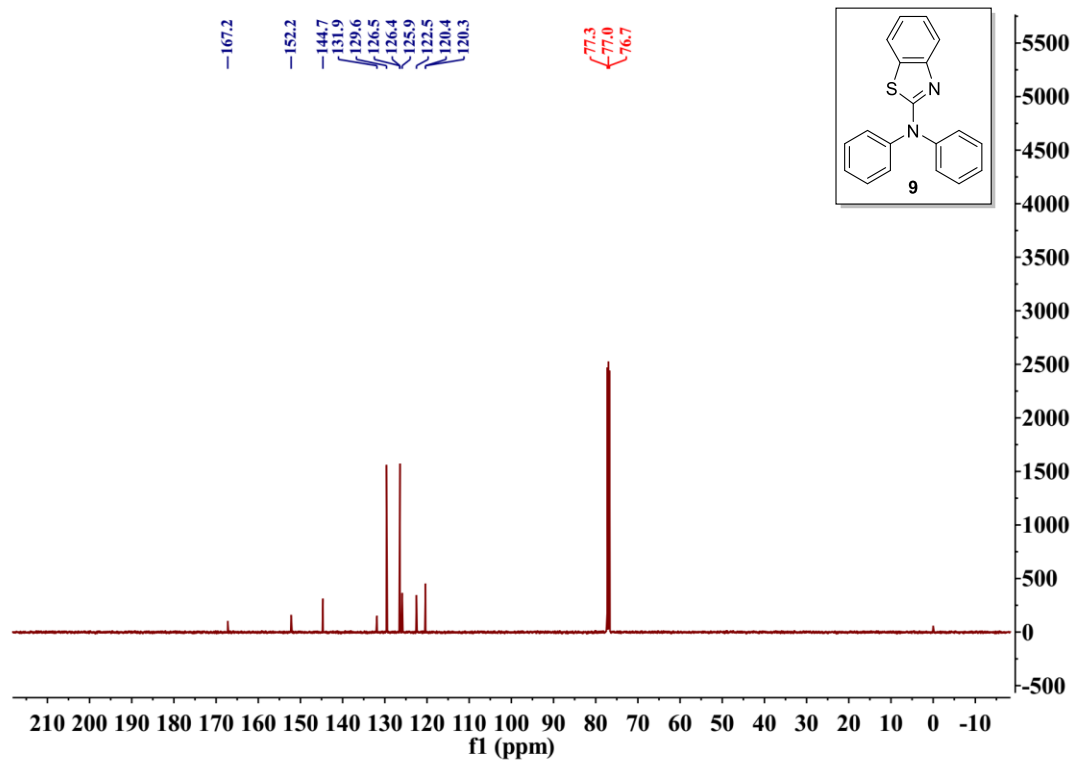

➤ HRMS spectrum for **9**

W-C-122 #19 RT: 0.21 AV: 1 SB: 9 0.44-0.64 NL: 1.19E9  
T: FTMS + c APCl corona Full ms [60.0000-900.0000]

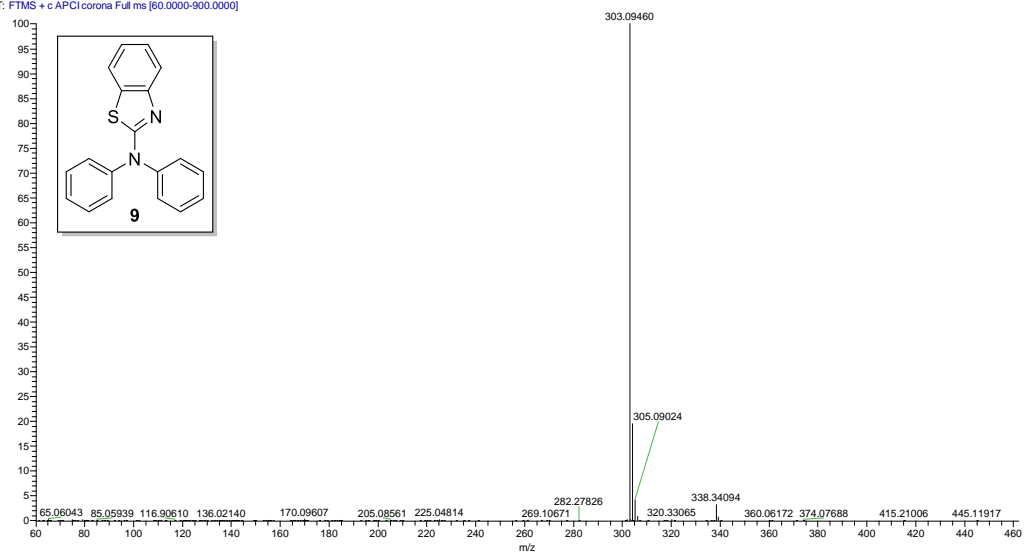

Supplement: d0qo00361a1.pdf [file d0qo00361a1.pdf]
